# Supplementary material for: Longitudinal plasma metabolomics of aging and sex
Source: Aging (Albany NY). 2019 Feb 24;11(4):1262–82. doi: 10.18632/aging.101837 (PMC6402508; doi:10.18632/aging.101837)
Supplement: Supplementary Table S1 [file aging-11-101837-s003.xlsx]

## Sheet: Results
compID	h2	SE_h2	p_h2	Hr2	BIOCHEMICAL	SUPER.PATHWAY	SUB.PATHWAY	CAS	PUBCHEM	KEGG	HMDB	B_age	SE_age	p_age	B_sex	SE_sex	p_sex	B_age_F	SE_age_F	p_age_F	B_age_M	SE_age_M	p_age_M	B_age_BySex	SE_age_BySex	p_age_BySex
1105	0.292531	0.121955	0.5	0.178403	linoleate (18:2n6)	Lipid	Polyunsaturated Fatty Acid (n3 and n6)	60-33-3	5280450	C01595	HMDB00673	0.002264	0.000659	0.000615194	0.09411	0.009225	1.8083e-23	0.002402	0.000795	0.00259654	0.002186	0.001184	0.0656363	-6e-05	0.00129	0.961371
1107	0.142629	0.105471	0.1845	0.147947	allantoin	Nucleotide	Purine Metabolism, (Hypo)Xanthine/Inosine containing	97-59-6	204	C02350	HMDB00462	0.001239	0.000279	9.64977e-06	-0.03063	0.003901	9.43665e-15	0.001744	0.000338	3.24638e-07	0.000168	0.000486	0.729988	0.001231	0.000548	0.024774
1110	0.317167	0.122653	0.01194	0.265621	arachidonate (20:4n6)	Lipid	Polyunsaturated Fatty Acid (n3 and n6)	506-32-1	444899	C00219	HMDB01043	7.6e-05	0.000592	0.898034	0.04565	0.00824	3.71708e-08	0.00042	0.000703	0.550741	-0.00054	0.001097	0.622341	0.000354	0.001142	0.75683
1114	0.256222	0.129405	0.07052	0.249219	deoxycholate	Lipid	Secondary Bile Acid Metabolism	83-44-3	222528	C04483	HMDB00626	-8e-05	0.00114	0.941412	-0.01756	0.01589	0.269331	0.000644	0.001344	0.631907	-0.0018	0.002159	0.404517	0.003108	0.002204	0.15873
1118	0.370587	0.122883	0.002957	0.335064	arachidate (20:0)	Lipid	Long Chain Fatty Acid	506-30-9	10467	C06425	HMDB02212	0.000504	0.000336	0.134364	-0.01094	0.004643	0.0186263	0.000656	0.000413	0.112521	0.000199	0.000588	0.735817	0.000461	0.000649	0.477735
1121	0.303012	0.122155	0.2162	0.18107	margarate (17:0)	Lipid	Long Chain Fatty Acid	506-12-7	10465		HMDB02259	0.003106	0.000643	1.56328e-06	0.04465	0.008997	8.00542e-07	0.004006	0.000789	4.74143e-07	0.001531	0.001103	0.16605	0.002827	0.001259	0.0248943
1123	0.254916	0.109577	0.00485	0.256905	inosine	Nucleotide	Purine Metabolism, (Hypo)Xanthine/Inosine containing	58-63-9	6021	C00294	HMDB00195	0.000596	0.001141	0.601666	0.02384	0.01577	0.130995	0.000172	0.001397	0.901787	0.001437	0.001975	0.467432	-0.00049	0.002202	0.82526
1124	0.054429	0.118559	0.5	0	myo-inositol	Lipid	Inositol Metabolism	87-89-8	892	C00137	HMDB00211	0.004965	0.000721	9.02306e-12	0.01373	0.01032	0.183755	0.005756	0.000898	2.6335e-10	0.003003	0.001222	0.0144167	0.003213	0.001373	0.0194032
1125	0.610595	0.111337	0.0001645	0.379808	isoleucine	Amino Acid	Leucine, Isoleucine and Valine Metabolism	73-32-5	6306	C00407	HMDB00172	-0.00032	0.00026	0.220745	-0.07596	0.003622	6.6417e-83	-0.0002	0.000321	0.534281	-0.00054	0.000446	0.229597	0.000269	0.000495	0.586725
1126	0.484605	0.122753	0.0008482	0.3761	alanine	Amino Acid	Alanine and Aspartate Metabolism	56-41-7	5950	C00041	HMDB00161	0.000138	0.000321	0.667521	-0.02369	0.004467	1.37481e-07	0.000225	0.000401	0.575112	-1e-05	0.000527	0.978396	0.000776	0.000615	0.207413
12017	0.819154	0.076169	0.5	0.288641	3-methoxytyrosine	Amino Acid	Tyrosine Metabolism	300-48-1	1670		HMDB01434	0.004126	0.000701	5.1292e-09	0.04848	0.009793	8.52504e-07	0.004991	0.000937	1.34525e-07	0.002865	0.000756	0.000176521	0.002144	0.001238	0.0834525
12129	0.250251	0.117985	0.03269	0.260828	beta-hydroxyisovalerate	Amino Acid	Leucine, Isoleucine and Valine Metabolism	625-08-1	69362		HMDB00754	0.000564	0.00052	0.278338	-0.09546	0.007189	1.62873e-37	0.000644	0.000617	0.297097	0.000623	0.000965	0.519168	0.000727	0.000994	0.464794
12261	0.450436	0.118452	0.01835	0.163393	taurodeoxycholate	Lipid	Secondary Bile Acid Metabolism	207737-97-1	2733768	C05463	HMDB00896	0.005131	0.002415	0.0338288	0.1523	0.03377	7.16436e-06	0.002762	0.00292	0.344519	0.01033	0.00424	0.0152734	-0.00837	0.004649	0.0719428
1284	0.28338	0.116386	0.007328	0.245478	threonine	Amino Acid	Glycine, Serine and Threonine Metabolism	72-19-5	6288	C00188	HMDB00167	-0.00151	0.000359	2.72768e-05	-0.01063	0.005021	0.0344543	-0.00158	0.000447	0.000419458	-0.00142	0.000591	0.0169055	-0.00056	0.000686	0.410204
1299	0.393534	0.123045	0.002063	0.452474	tyrosine	Amino Acid	Tyrosine Metabolism	60-18-4	6057	C00082	HMDB00158	0.000712	0.000318	0.0253153	-0.03027	0.00441	1.08804e-11	0.000872	0.000389	0.0250489	0.000319	0.000554	0.564797	0.000617	0.000598	0.30214
1301	0.821973	0.104962	1.197e-06	0.550022	lysine	Amino Acid	Lysine Metabolism	56-87-1	5962	C00047	HMDB00182	0.000156	0.000253	0.536788	-0.00275	0.003495	0.431359	0.000353	0.000311	0.255823	-0.00022	0.00044	0.614974	0.000633	0.000472	0.180244
1302	0.731227	0.119379	0.0001418	0.465919	methionine	Amino Acid	Methionine, Cysteine, SAM and Taurine Metabolism	63-68-3	6137	C00073	HMDB00696	-0.00051	0.000271	0.059706	-0.05132	0.003779	5.32219e-39	-0.00058	0.000327	0.0763048	-0.00023	0.000492	0.637877	-0.00024	0.000531	0.65807
1303	0.418984	0.117109	0.0001239	0.353534	malate	Energy	TCA Cycle	6915-15-7	525	C00149	HMDB00156	0.001796	0.000373	1.70012e-06	-0.02767	0.005156	9.69423e-08	0.002	0.000456	1.28502e-05	0.001552	0.000659	0.0191069	0.000411	0.000688	0.55088
1336	0.320154	0.12033	0.5	0.13961	palmitate (16:0)	Lipid	Long Chain Fatty Acid	57-10-3	985	C00249	HMDB00220	0.001802	0.000491	0.000255028	0.04801	0.0069	5.72748e-12	0.002108	0.000593	0.000398344	0.001301	0.000879	0.139725	0.001009	0.000963	0.295019
1356	0.156046	0.111486	0.1585	0.150748	nonadecanoate (19:0)	Lipid	Long Chain Fatty Acid	646-30-0	12591	C16535	HMDB00772	0.001664	0.000441	0.000167189	0.01455	0.006139	0.0179274	0.00202	0.000539	0.000192179	0.001034	0.000769	0.179838	0.000893	0.00086	0.299229
1358	0.439701	0.116546	0.04506	0.251087	stearate (18:0)	Lipid	Long Chain Fatty Acid	57-11-4	5281	C01530	HMDB00827	0.001449	0.000385	0.000177163	0.01641	0.005367	0.00228031	0.001827	0.00047	0.000108707	0.000722	0.000673	0.284072	0.001104	0.000747	0.140077
1361	0.083293	0.11289	0.4879	0.0491739	pentadecanoate (15:0)	Lipid	Long Chain Fatty Acid	1002-84-2;10002-84-2	13849	C16537	HMDB00826	0.001899	0.000486	0.000100596	0.0595	0.006853	1.28014e-17	0.002298	0.000596	0.000126243	0.001346	0.000852	0.115053	0.00127	0.000961	0.186302
1365	0.118609	0.11626	0.3693	0.103519	myristate (14:0)	Lipid	Long Chain Fatty Acid	544-63-8	11005	C06424	HMDB00806	0.002388	0.000732	0.0011444	0.1119	0.01033	4.31392e-26	0.002696	0.000882	0.0023283	0.002237	0.001329	0.0930568	0.000668	0.001445	0.64402
1417	0.542934	0.119923	0.0003258	0.421772	kynurenate	Amino Acid	Tryptophan Metabolism	492-27-3	3845	C01717	HMDB00715	0.001465	0.000627	0.0196781	-0.08236	0.008695	1.4572e-20	0.002082	0.000782	0.00794874	0.000802	0.00105	0.445739	0.000443	0.001169	0.704916
1418	0.1592	0.117194	0.3119	0.127612	5,6-dihydrothymine	Nucleotide	Pyrimidine Metabolism, Thymine containing	696-04-8	93556	C00906	HMDB00079	0.001926	0.000436	1.093e-05	-0.02792	0.006105	5.35938e-06	0.001623	0.000538	0.00263879	0.002736	0.000754	0.000329828	-0.0013	0.000859	0.129733
1419	0.364784	0.131445	0.01127	0.276375	5-methylthioadenosine (MTA)	Amino Acid	Polyamine Metabolism	2457-80-9	439176	C00170	HMDB01173	0.003031	0.00046	6.71725e-11	-0.01058	0.006386	0.0978685	0.003355	0.000568	5.17663e-09	0.002309	0.00079	0.00367243	0.001677	0.000868	0.0536847
1432				0.0966587	2-hydroxyphenylacetate	Amino Acid	Tyrosine Metabolism	614-75-5	11970	C05852	HMDB00669	0.000891	0.00125	0.476127	-0.16	0.01748	2.4018e-19	0.001201	0.001541	0.436079	0.000892	0.002143	0.677314	0.000257	0.002458	0.91671
1437	0.188571	0.129655	0.4078	0	succinate	Energy	TCA Cycle	110-15-6	1110	C00042	HMDB00254	0.001756	0.001385	0.205132	0.04218	0.01971	0.0325053	0.000306	0.001642	0.852393	0.003616	0.002539	0.155347	0.000342	0.002597	0.895339
1444	0.388428	0.12522	0.0155	0.204379	pipecolate	Amino Acid	Lysine Metabolism	4043-87-2	849	C00408	HMDB00070	0.000154	0.000942	0.869984	-0.05661	0.01308	1.6437e-05	-0.00021	0.001131	0.850578	0.001125	0.001691	0.506309	-0.00188	0.001844	0.308163
1493	0.508115	0.118802	0.0001282	0.440122	ornithine	Amino Acid	Urea cycle; Arginine and Proline Metabolism	3184-13-2	6262	C00077	HMDB03374	0.0016	0.000372	1.88376e-05	-0.00857	0.005129	0.094906	0.001887	0.000465	5.43705e-05	0.001051	0.000621	0.09161	0.001043	0.000686	0.128879
1494	0.49018	0.12261	0.0001586	0.523318	5-oxoproline	Amino Acid	Glutathione Metabolism	98-79-3	7405	C01879	HMDB00267	0.000739	0.000322	0.0218075	-0.02172	0.004439	1.13554e-06	0.000661	0.000394	0.093748	0.001107	0.000565	0.0509432	-0.00016	0.000595	0.784709
1496	0.01494	0.105043	0.5	0	methylmalonate (MMA)	Lipid	Fatty Acid Metabolism (also BCAA Metabolism)	516-05-2	487	C02170	HMDB00202	0.00174	0.002009	0.386782	0.004095	0.02853	0.885907	3.1e-05	0.002408	0.989781	0.00392	0.003612	0.278529	-0.00545	0.003852	0.157689
1498	0.403563	0.110487	0.01361	0.329635	N6,N6,N6-trimethyllysine	Amino Acid	Lysine Metabolism	23284-33-5	440120	C03793	HMDB01325	0.001755	0.000623	0.00493205	-0.09224	0.008592	1.08078e-25	0.002251	0.000763	0.00325064	0.001064	0.001077	0.323606	0.001744	0.001202	0.147014
1505	0.553188	0.127026	0.0002489	0.4987	orotate	Nucleotide	Pyrimidine Metabolism, Orotate containing	50887-69-9	967	C00295	HMDB00226	0.003557	0.000699	4.19511e-07	-0.03374	0.009579	0.000444328	0.00199	0.000736	0.00699066	0.007196	0.001516	2.92772e-06	-0.00489	0.001198	4.72208e-05
1508				0.233327	pantothenate	Cofactors and Vitamins	Pantothenate and CoA Metabolism	137-08-6	6613	C00864	HMDB00210	0.004123	0.0009	5.16665e-06	0.02464	0.01267	0.0520354	0.004153	0.001121	0.000225752	0.003783	0.001524	0.0135114	0.00034	0.001703	0.841812
15122	0.227241	0.121434	0.3238	0.173585	glycerol	Lipid	Glycerolipid Metabolism	56-81-5	753	C00116	HMDB00131	0.003218	0.00068	2.53319e-06	0.21	0.009589	3.16416e-89	0.003392	0.000844	6.48651e-05	0.003343	0.001156	0.00405993	0.000566	0.001348	0.674439
15140	0.591056	0.105881	2.852e-05	0.466154	kynurenine	Amino Acid	Tryptophan Metabolism	2922-83-0	161166	C00328	HMDB00684	0.001525	0.000424	0.00033025	-0.02848	0.005841	1.23593e-06	0.001948	0.000529	0.00024389	0.0007	0.000695	0.314357	0.00125	0.000787	0.112393
1515	0.161312	0.123774	0.2122	0.115423	salicylate	Xenobiotics	Drug - Topical Agents	69-72-7	338	C00805	HMDB01895	0.007628	0.002585	0.00323592	0.009808	0.03617	0.786305	0.003267	0.003183	0.305108	0.01633	0.004547	0.000378176	-0.0147	0.005076	0.00384812
1516	0.428848	0.123483	0.003784	0.406019	sarcosine	Amino Acid	Glycine, Serine and Threonine Metabolism	107-97-1	1088	C00213	HMDB00271	0.000115	0.000343	0.737047	-0.02888	0.004729	1.30061e-09	0.000915	0.00042	0.0294995	-0.00147	0.000593	0.0135606	0.002429	0.00067	0.000296405
15336	0.065394	0.111406	0.4668	0.0545856	tartarate	Xenobiotics	Food Component/Plant	87-69-4;6106-24-7	444305	C00898	HMDB00956	0.007758	0.001589	1.21877e-06	0.109	0.02235	1.22043e-06	0.008546	0.001884	6.69781e-06	0.006289	0.003013	0.0375915	0.001126	0.00315	0.720836
15443	0.125543	0.124552	0.5	0	glucuronate	Carbohydrate	Aminosugar Metabolism	207300-70-7	444791	C00191	HMDB00127	0.004983	0.001009	9.30751e-07	-0.00397	0.01433	0.782019	0.003926	0.001167	0.000803289	0.005859	0.001902	0.00223486	-0.00137	0.00197	0.487817
1549	0.111918	0.126614	0.4274	0	3-hydroxyisobutyrate	Amino Acid	Leucine, Isoleucine and Valine Metabolism	2068-83-9	87	C06001	HMDB00336	0.000286	0.000628	0.648997	-0.07869	0.008811	1.64426e-18	0.000462	0.000765	0.546261	-0.00027	0.001074	0.804548	0.000559	0.001243	0.652932
15500	0.719368	0.105478	2.627e-10	0.721474	carnitine	Lipid	Carnitine Metabolism	461-05-2	10917	C00318	HMDB00062	0.000512	0.000314	0.103109	-0.02215	0.004323	3.48709e-07	0.000813	0.000386	0.0353459	-0.00012	0.000534	0.824459	0.0013	0.00058	0.0249776
15506	0.200386	0.124305	0.2484	0.147073	choline	Lipid	Phospholipid Metabolism	67-48-1	305	C00114	HMDB00097	0.001611	0.000317	4.42214e-07	-0.02675	0.004437	2.2118e-09	0.001339	0.000402	0.000921981	0.001987	0.000501	9.0174e-05	-0.00086	0.00061	0.157555
1552	0.156203	0.115394	0.273	0.160726	erucate (22:1n9)	Lipid	Long Chain Fatty Acid	112-86-7	5281116	C08316	HMDB02068	0.004044	0.000844	1.90818e-06	-0.02709	0.01189	0.0228761	0.004597	0.001004	5.46937e-06	0.003377	0.001563	0.0314279	0.001538	0.001639	0.348056
1558	0.449889	0.112037	0.1074	0.262251	4-acetamidobutanoate	Amino Acid	Polyamine Metabolism	3025-96-5	18189	C02946	HMDB03681	0.005257	0.000729	1.01374e-12	0.02564	0.01014	0.0116133	0.006023	0.000876	1.31235e-11	0.003891	0.001315	0.00327711	0.002339	0.001391	0.0928148
15581	0.36797	0.13468	0.5	0	xylose	Carbohydrate	Pentose Metabolism	609-06-3	135191	C00181	HMDB00098	0.003061	0.001241	0.0138224	7.4e-05	0.01748	0.996634	0.003424	0.001515	0.0241148	0.002731	0.002254	0.226606	0.001555	0.002498	0.533708
15586	0.819484	0.09476	0.5	0.36392	maltose	Carbohydrate	Glycogen Metabolism	6363-53-7	10991489	C00208	HMDB00163	0.001709	0.002368	0.47051	0.009346	0.0327	0.775092	0.002485	0.002877	0.388004	0.002573	0.004198	0.540238	0.000888	0.004488	0.843166
1559	0.216693	0.126907	0.5	0.0417856	5,6-dihydrouracil	Nucleotide	Pyrimidine Metabolism, Uracil containing	504-07-4	649	C00429	HMDB00076	0.001779	0.001406	0.206043	0.002129	0.01986	0.914647	0.001562	0.001718	0.363636	0.002145	0.002557	0.4022	-0.00143	0.002828	0.613914
1561	0.19625	0.118105	0.2446	0.115009	alpha-tocopherol	Cofactors and Vitamins	Tocopherol Metabolism	59-02-9;10191-41-0	14985	C02477	HMDB01893	0.002039	0.000443	4.75823e-06	0.03126	0.006245	6.47124e-07	0.002281	0.000543	3.01208e-05	0.001789	0.000773	0.0211434	0.000499	0.00086	0.561957
1563	0.265041	0.122031	0.5	0.0261415	chenodeoxycholate	Lipid	Primary Bile Acid Metabolism	474-24-9;474-25-9	10133	C02528	HMDB00518	0.001996	0.001963	0.309642	-0.135	0.02778	1.34082e-06	0.001968	0.002316	0.395861	0.001437	0.003711	0.69885	-0.00057	0.003873	0.883587
1564	0.388624	0.122249	0.03089	0.223635	citrate	Energy	TCA Cycle	77-92-9	311	C00158	HMDB00094	0.001816	0.00023	8.18095e-15	0.009961	0.003236	0.00212985	0.001759	0.000281	6.8745e-10	0.002042	0.000404	7.06178e-07	-9e-05	0.000445	0.83864
15650	0.456579	0.116527	0.5	0.139291	N1-methyladenosine	Nucleotide	Purine Metabolism, Adenine containing	15763-06-1	27476	C02494	HMDB03331	0.001742	0.00031	2.39716e-08	-0.00614	0.004361	0.159266	0.00213	0.000388	5.4633e-08	0.000981	0.000509	0.054728	0.001343	0.000584	0.0216444
1566	0.540293	0.11977	1.156e-05	0.69945	3-aminoisobutyrate	Nucleotide	Pyrimidine Metabolism, Thymine containing	10569-72-9;214139-20-5	64956	C05145	HMDB03911	0.004902	0.000811	2.02174e-09	-0.03492	0.01123	0.00191833	0.004086	0.000956	2.16441e-05	0.00689	0.001505	6.34525e-06	-0.00146	0.001436	0.309954
1567	0.417301	0.115997	0.0263	0.305747	vanillylmandelate (VMA)	Amino Acid	Tyrosine Metabolism	55-10-7	1245	C05584	HMDB00291	0.006408	0.000582	7.39109e-27	0.01277	0.008111	0.115697	0.007229	0.000714	8.68626e-23	0.005176	0.001004	4.12284e-07	0.001621	0.001097	0.139665
15676	0.688584	0.10142	0.0009256	0.393264	3-methyl-2-oxovalerate	Amino Acid	Leucine, Isoleucine and Valine Metabolism	1460-34-0;51829-07-3	47	C00671	HMDB03736	-0.00136	0.000392	0.000551167	-0.09249	0.005442	5.57473e-58	-0.00099	0.000482	0.0407347	-0.00211	0.000677	0.00201318	0.000739	0.000732	0.313061
15677	0.377839	0.127395	0.4084	0.147342	3-methylhistidine	Amino Acid	Histidine Metabolism	368-16-1	64969	C01152	HMDB00479	0.004354	0.002054	0.0342965	-0.00543	0.02874	0.850255	0.005653	0.00257	0.0281745	0.001959	0.003458	0.571357	0.003338	0.004058	0.410956
15679	0.464769	0.124003	0.0004382	0.460706	xanthurenate	Amino Acid	Tryptophan Metabolism	59-007	5699	C02470	HMDB00881	-0.00488	0.001419	0.000604338	-0.2424	0.01966	6.25154e-33	-0.00468	0.001857	0.0118916	-0.00408	0.00203	0.0449949	-0.00038	0.002703	0.889516
15681	0.536788	0.113908	0.0001923	0.493157	4-guanidinobutanoate	Amino Acid	Guanidino and Acetamido Metabolism	463-003;463-00-3	500	C01035	HMDB03464	6.3e-05	0.001237	0.959567	-0.3137	0.01708	2.60269e-66	0.00069	0.001549	0.656175	-0.0009	0.002032	0.656749	0.003585	0.002318	0.122115
15685	0.240059	0.12064	0.1272	0.125062	5-hydroxylysine	Amino Acid	Lysine Metabolism	13204-98-3	1029	C16741	HMDB00450	0.002431	0.000896	0.00675941	0.08266	0.01256	6.88141e-11	0.002965	0.001046	0.00470086	0.001616	0.001697	0.341535	0.001003	0.001649	0.543333
15705	0.171932	0.123514	0.5	0.0079735	cystathionine	Amino Acid	Methionine, Cysteine, SAM and Taurine Metabolism	535-34-2	439258	C02291	HMDB00099	0.006449	0.001414	5.87245e-06	-0.01998	0.01999	0.317861	0.007747	0.001756	1.20074e-05	0.004636	0.002431	0.0573198	0.004544	0.002769	0.101043
15716	0.720397	0.091855	3.949e-08	0.607134	imidazole lactate	Amino Acid	Histidine Metabolism	14403-45-3	440129	C05568	HMDB02320	-3e-05	0.000615	0.965846	-0.06057	0.008483	1.63192e-12	-1e-05	0.000731	0.986374	4.1e-05	0.001142	0.971575	0.001673	0.001025	0.102895
1572	0.196981	0.123659	0.2281	0.130775	glycerate	Carbohydrate	Glycolysis, Gluconeogenesis, and Pyruvate Metabolism	600-19-1	752	C00258	HMDB00139	0.002387	0.0005	2.02801e-06	0.03356	0.007028	2.02569e-06	0.003005	0.000608	9.47845e-07	0.001242	0.000868	0.153391	0.00092	0.000965	0.340217
15720	0.414668	0.113516	0.5	0	N-acetylglutamate	Amino Acid	Glutamate Metabolism	1430871	70914	C00624	HMDB01138	0.002779	0.002072	0.180167	0.02585	0.02988	0.387188	0.000926	0.002561	0.717836	0.006275	0.003633	0.0849444	-0.00524	0.003551	0.139812
15736	0.148578	0.116635	0.4504	0.119412	4-acetamidophenylglucuronide	Xenobiotics	Drug - Analgesics, Anesthetics	120595-80-4	83944		HMDB10316	0.003557	0.004302	0.408433	0.2253	0.06044	0.000202646	0.000974	0.005518	0.859935	0.01066	0.006844	0.120141	-0.00579	0.008452	0.493437
15745	0.214056	0.157636	0.5	0	methylsuccinate	Amino Acid	Leucine, Isoleucine and Valine Metabolism	498-21-5	10349		HMDB01844	0.003594	0.000767	3.12537e-06	0.005533	0.01095	0.613369	0.003266	0.000872	0.000193837	0.0034	0.001497	0.0237046	0.001275	0.001523	0.402498
15749	0.451794	0.120427	0.001018	0.406206	3-phenylpropionate (hydrocinnamate)	Xenobiotics	Benzoate Metabolism	501-52-0	107	C05629	HMDB00764	0.001478	0.002391	0.536478	0.02177	0.03335	0.51412	-0.00131	0.002931	0.656106	0.008243	0.004146	0.0475614	-0.00658	0.004561	0.149215
15753	0.380733	0.118135	0.0008376	0.359963	hippurate	Xenobiotics	Benzoate Metabolism	495-69-2	464	C01586	HMDB00714	0.005124	0.001416	0.000310123	-0.00279	0.01965	0.887302	0.00416	0.001692	0.0141377	0.007984	0.00259	0.00221045	-0.00303	0.00273	0.267017
15765	0.685627	0.113085	6.71e-08	0.575168	ethylmalonate	Amino Acid	Leucine, Isoleucine and Valine Metabolism	601-75-2	11756		HMDB00622	0.003517	0.000833	2.62689e-05	0.01795	0.01153	0.119667	0.004263	0.001031	3.89365e-05	0.001663	0.00139	0.232259	0.002458	0.00134	0.066867
15772	0.415479	0.136796	0.01357	0.287738	ribitol	Carbohydrate	Pentose Metabolism	488-81-3	6912	C00474	HMDB00508	0.00133	0.000553	0.0162906	-0.00712	0.007659	0.352549	0.002048	0.000714	0.0042292	2.7e-05	0.000815	0.97403	0.002213	0.001051	0.0354649
15778	0.313726	0.115143	0.5	0	benzoate	Xenobiotics	Benzoate Metabolism	65-85-0	243	C00180	HMDB01870	0.000373	0.001022	0.715082	0.03966	0.01435	0.00581347	0.000929	0.001245	0.4556	-0.00062	0.001822	0.735038	0.00132	0.002037	0.517057
1584	0.170566	0.115992	0.1289	0.171041	methyl indole-3-acetate	Xenobiotics	Food Component/Plant	1912-33-0	74706		HMDB29738	0.008773	0.00154	1.58231e-08	-0.1062	0.02169	1.10905e-06	0.01082	0.0019	1.85459e-08	0.006006	0.002615	0.0222209	0.005447	0.002982	0.0679388
1585	0.400033	0.117326	0.0001574	0.359617	N-acetylalanine	Amino Acid	Alanine and Aspartate Metabolism	97-69-8	88064	C02847	HMDB00766	0.001982	0.000286	7.04644e-12	-0.00823	0.003981	0.03892	0.002212	0.000349	3.81633e-10	0.001389	0.000498	0.00553564	0.000359	0.00053	0.498243
1587	0.328471	0.115522	0.02176	0.239903	N-acetylleucine	Amino Acid	Leucine, Isoleucine and Valine Metabolism	1188-21-2	70912	C02710	HMDB11756	0.001147	0.000722	0.112771	-0.07217	0.01002	1.08093e-12	0.001187	0.000888	0.181695	0.001279	0.001268	0.313991	0.000591	0.0014	0.672817
1589	0.532309	0.111057	9.556e-06	0.458365	N-acetylmethionine	Amino Acid	Methionine, Cysteine, SAM and Taurine Metabolism	65-82-7	448580	C02712	HMDB11745	0.002758	0.000481	1.28368e-08	0.001899	0.006689	0.776515	0.002814	0.000605	3.86569e-06	0.002578	0.000791	0.00122572	-0.00048	0.000902	0.591907
1591	0.29656	0.115968	0.005006	0.267722	N-acetylvaline	Amino Acid	Leucine, Isoleucine and Valine Metabolism	96-81-1	66789		HMDB11757	0.002308	0.000341	2.03592e-11	-0.01357	0.004755	0.00439979	0.002483	0.000418	4.26104e-09	0.002184	0.000596	0.00028829	0.000507	0.000667	0.446984
15990	0.325586	0.129187	0.5	0	glycerophosphorylcholine (GPC)	Lipid	Phospholipid Metabolism	28319-77-9	71920	C00670	HMDB00086	-0.00018	0.000558	0.740716	0.02097	0.00792	0.00821821	0.000384	0.000693	0.579375	-0.00129	0.000959	0.180474	0.001394	0.001115	0.211575
1600				0.432505	phosphoethanolamine	Lipid	Phospholipid Metabolism	1071-23-4	1015	C00346	HMDB00224	-0.0008	0.000814	0.327072	0.0601	0.01121	1.00722e-07	-0.00037	0.000974	0.70193	-0.00174	0.001498	0.245657	0.001822	0.001558	0.242246
1604	0.393447	0.113958	8.633e-05	0.34967	urate	Nucleotide	Purine Metabolism, (Hypo)Xanthine/Inosine containing	69-93-2;120K5305	1175	C00366	HMDB00289	0.000955	0.000372	0.0103208	-0.08497	0.005182	1.2227e-54	0.001372	0.000465	0.00327793	0.000161	0.00061	0.792567	0.000977	0.000678	0.150178
1638	0.375594	0.114053	0.001626	0.305899	arginine	Amino Acid	Urea cycle; Arginine and Proline Metabolism	1119-34-2	232	C00062	HMDB00517	-0.00033	0.00035	0.348144	-0.01561	0.00489	0.00145493	-0.00027	0.00042	0.512974	-0.0005	0.000638	0.437778	0.000541	0.000656	0.409593
1642	0.163058	0.133539	0.5	0	caprate (10:0)	Lipid	Medium Chain Fatty Acid	112-37-8	2969	C01571	HMDB00511	0.001861	0.000725	0.0103895	0.08759	0.01027	4.42113e-17	0.002306	0.000933	0.0136899	0.001247	0.001147	0.277551	0.00199	0.001419	0.161039
1643	0.188725	0.144506	0.3061	0	fumarate	Energy	TCA Cycle	100-17-8	444972	C00122	HMDB00134	0.002397	0.000928	0.00995461	4.304e-06	0.01311	0.999738	0.001944	0.00105	0.0646662	0.003022	0.001886	0.109816	0.00123	0.001761	0.484942
1644	0.111562	0.114187	0.4272	0.0465106	heptanoate (7:0)	Lipid	Medium Chain Fatty Acid	111-14-8	8094	C17714	HMDB00666	0.002287	0.001184	0.0535982	0.01971	0.0167	0.238222	-9e-05	0.001426	0.949702	0.008341	0.002195	0.000169952	-0.00721	0.002353	0.00221393
1645	0.304924	0.125598	0.03463	0.281976	laurate (12:0)	Lipid	Medium Chain Fatty Acid	143-07-7	3893	C02679	HMDB00638	0.001692	0.000798	0.0341636	0.1309	0.01116	4.16242e-30	0.002322	0.000984	0.0185468	0.000676	0.001382	0.625154	0.001598	0.001542	0.300416
1648	0.608478	0.109661	5.924e-07	0.551571	serine	Amino Acid	Glycine, Serine and Threonine Metabolism	56-45-1	5951	C00065	HMDB00187	-0.00092	0.000349	0.00850819	0.02876	0.004853	4.05365e-09	-0.00093	0.000443	0.0349607	-0.00075	0.000553	0.173608	-0.0005	0.000634	0.43066
1649	0.34813	0.118543	0.002536	0.246269	valine	Amino Acid	Leucine, Isoleucine and Valine Metabolism	72-18-4	6287	C00183	HMDB00883	4.8e-05	0.000303	0.873265	-0.0582	0.004249	1.12725e-39	0.000219	0.000373	0.556958	-0.00037	0.000518	0.47258	0.000635	0.000584	0.277122
1669	0.347552	0.128409	0.01027	0.323105	4-hydroxyphenylpyruvate	Amino Acid	Tyrosine Metabolism	156-39-8	979	C01179	HMDB00707	-0.00121	0.000731	0.0982855	0.006128	0.0102	0.548108	-0.00118	0.000878	0.178797	-0.00074	0.001322	0.575803	0.000795	0.001434	0.579471
1670	0.301278	0.125516	0.1745	0.272885	urea	Amino Acid	Urea cycle; Arginine and Proline Metabolism	57-13-6	1176	C00086	HMDB00294	0.004105	0.000448	2.29128e-19	-0.03106	0.006242	7.433e-07	0.004512	0.000542	3.97924e-16	0.003206	0.000798	7.1709e-05	0.001742	0.000854	0.0414957
1712	0.273739	0.094239	0.0006774	0.350078	cortisol	Lipid	Corticosteroids	50-23-7	5754	C00735	HMDB00063	0.002147	0.000626	0.000623612	0.01936	0.008673	0.0257894	0.001842	0.000772	0.0172816	0.003262	0.001079	0.00268222	-0.00219	0.001215	0.0713167
1769	0.261893	0.097561	0.5	0.0903723	cortisone	Lipid	Corticosteroids	53-06-5	222786	C00762	HMDB02802	-0.00121	0.000537	0.0250385	-0.03947	0.007533	1.91356e-07	-0.00103	0.000674	0.128052	-0.00127	0.0009	0.158485	-0.00017	0.001063	0.869825
17747	0.587607	0.105295	4.097e-11	0.624414	sphingosine	Lipid	Sphingolipid Metabolism	123-78-4	5353955	C00319	HMDB00252	0.000552	0.001151	0.631624	0.003275	0.01566	0.834415	-2e-05	0.001435	0.986518	0.000887	0.001968	0.652604	0.000256	0.00211	0.903312
17769	0.696168	0.098322	3.546e-11	0.721672	sphinganine	Lipid	Sphingolipid Metabolism	3102-56-5	3126	C00836	HMDB00269	0.00047	0.001177	0.68981	0.04045	0.01608	0.0120353	-0.00042	0.001452	0.773371	0.001585	0.002032	0.435825	-0.00032	0.002134	0.880013
17805	0.182651	0.116661	0.1261	0.210902	dihomo-linoleate (20:2n6)	Lipid	Polyunsaturated Fatty Acid (n3 and n6)	2091-39-6	6439848	C16525	HMDB05060	0.00262	0.000774	0.000734068	0.05493	0.01081	4.39209e-07	0.002679	0.000938	0.00441516	0.002485	0.001368	0.0700569	-0.00015	0.001511	0.920705
17945	0.119777	0.139222	0.5	0	2-hydroxystearate	Lipid	Fatty Acid, Monohydroxy	629-22-1	69417	C03045		0.000626	0.000364	0.085629	0.02821	0.005108	4.13486e-08	0.000769	0.000449	0.0871211	0.000292	0.00064	0.648519	0.000181	0.000723	0.802702
1806	0.354193	0.121144	0.003076	0.4299	retinol (Vitamin A)	Cofactors and Vitamins	Vitamin A Metabolism	68-26-8	445354	C00473	HMDB00305	0.000188	0.000432	0.663664	-0.04339	0.006048	1.29991e-12	0.001074	0.000524	0.0407655	-0.00161	0.000752	0.0325965	0.003052	0.000787	0.000110217
18245	0.462875	0.117849	0.08686	0.240378	gamma-glutamylhistidine	Peptide	Gamma-glutamyl Amino Acid	37460-15-4	7017195			0.001052	0.000396	0.00805781	-0.02673	0.005532	1.54156e-06	0.000994	0.000487	0.0416686	0.00111	0.000673	0.100208	0.000264	0.00077	0.731398
18254	0.284828	0.102904	0.0006251	0.286887	paraxanthine	Xenobiotics	Xanthine Metabolism	611-59-6	4687	C13747	HMDB01860	-0.00378	0.0024	0.115895	-0.05579	0.03361	0.0971682	-0.00579	0.002876	0.0443368	-0.00046	0.004403	0.917085	-0.00668	0.00452	0.139878
18280	0.282977	0.121434	0.03622	0.209188	gentisate	Amino Acid	Tyrosine Metabolism	490-79-9	3469	C00628	HMDB00152	0.003796	0.001311	0.00388416	-0.0099	0.01844	0.591515	0.002231	0.001624	0.170079	0.007388	0.002281	0.0013223	-0.00393	0.002603	0.131229
18281	0.246531	0.126781	0.06941	0.197908	2-hydroxyhippurate (salicylurate)	Xenobiotics	Benzoate Metabolism	487-54-7	10253	C07588	HMDB00840	0.0132	0.002869	4.72634e-06	-0.02129	0.04002	0.594864	0.009085	0.00355	0.0106957	0.02114	0.004963	2.62639e-05	-0.01379	0.005614	0.0141523
18335	0.458212	0.11399	1.725e-05	0.424381	quinate	Xenobiotics	Food Component/Plant	77-95-2	6508	C00296	HMDB03072	0.008211	0.003401	0.0159104	0.1021	0.04761	0.0322262	0.00669	0.003991	0.0941447	0.0121	0.006433	0.0608486	-0.00023	0.005971	0.969813
18349	0.504672	0.111063	0.5	0.226494	indolelactate	Amino Acid	Tryptophan Metabolism	832-97-3	92904	C02043	HMDB00671	-0.00144	0.000558	0.00988144	-0.1163	0.00778	2.21464e-46	-0.0009	0.000683	0.189641	-0.00236	0.000985	0.0172784	0.001796	0.001061	0.0906419
18368	0.422653	0.110883	3.138e-06	0.49705	cys-gly, oxidized	Amino Acid	Glutathione Metabolism	7729-20-6	333293			-0.0009	0.001077	0.401266	-0.06887	0.015	4.9034e-06	0.00094	0.001339	0.482957	-0.00454	0.00179	0.0116188	0.006678	0.002027	0.00100841
18369	0.336314	0.109757	0.05795	0.173664	gamma-glutamylleucine	Peptide	Gamma-glutamyl Amino Acid	2566-39-4	151023		HMDB11171	0.001036	0.000411	0.0117827	-0.08927	0.005759	2.53343e-49	0.001169	0.000499	0.0195386	0.000827	0.000735	0.261236	0.000294	0.000813	0.717726
18374	0.471027	0.130561	0.002698	0.353432	methionine sulfoxide	Amino Acid	Methionine, Cysteine, SAM and Taurine Metabolism	3226-65-1	158980	C02989	HMDB02005	0.001607	0.000363	1.06481e-05	-0.00268	0.005063	0.596892	0.001674	0.000435	0.000129852	0.001739	0.000664	0.00921625	5.1e-05	0.000704	0.942723
18392	0.324783	0.106139	0.001494	0.32894	theobromine	Xenobiotics	Xanthine Metabolism	83-67-0	5429	C07480	HMDB02825	6.6e-05	0.001868	0.971974	0.04325	0.02606	0.0972822	0.00085	0.002218	0.701654	-0.00117	0.003462	0.735388	0.001561	0.003645	0.668548
18394	0.472632	0.098829	0.0003479	0.303362	theophylline	Xenobiotics	Xanthine Metabolism	58-55-9	2153	C07130	HMDB01889	-0.00579	0.002472	0.0192367	-0.00407	0.03472	0.906614	-0.00795	0.002949	0.00714327	-0.00142	0.004576	0.757085	-0.00599	0.004586	0.19196
18467	0.522076	0.120676	4.724e-05	0.454504	eicosapentaenoate (EPA; 20:5n3)	Lipid	Polyunsaturated Fatty Acid (n3 and n6)	10-2005-9;10417-94-4	446284	C06428	HMDB01999	0.005261	0.00121	1.49745e-05	0.08487	0.01691	5.94207e-07	0.006543	0.001474	1.02575e-05	0.003654	0.002101	0.082826	0.001758	0.002295	0.443779
18476	0.313211	0.12587	0.3461	0.174086	glycocholate	Lipid	Primary Bile Acid Metabolism	475-31-0;863-57-0	10140	C01921	HMDB00138	0.003958	0.00199	0.0469161	-0.05905	0.02796	0.0349431	0.004013	0.002485	0.106768	0.004302	0.00333	0.197287	-0.0015	0.003817	0.695078
18477	0.207383	0.119374	0.1669	0.104115	glycodeoxycholate	Lipid	Secondary Bile Acid Metabolism	360-65-6	3035026	C05464	HMDB00631	0.00553	0.002628	0.0356147	0.1232	0.03699	0.000891242	0.004119	0.003167	0.193732	0.008005	0.004739	0.0920645	-0.00571	0.005113	0.264183
18494	0.353699	0.13557	0.1168	0.25177	taurochenodeoxycholate	Lipid	Primary Bile Acid Metabolism	6009-98-9	387316	C05465	HMDB00951	0.005	0.002406	0.0379124	0.0452	0.0336	0.178877	0.00399	0.002971	0.179622	0.008784	0.004152	0.0350589	-0.00245	0.00463	0.596666
18497	0.227986	0.128817	0.3124	0.216479	taurocholate	Lipid	Primary Bile Acid Metabolism	145-42-6	6675	C05122	HMDB00036	0.007544	0.002959	0.010928	0.04138	0.04139	0.317606	0.007548	0.003659	0.0394841	0.008906	0.005051	0.078769	-0.00216	0.005604	0.700564
1868	0.087473	0.116932	0.3674	0.148646	cysteine	Amino Acid	Methionine, Cysteine, SAM and Taurine Metabolism	52-90-4;56-89-3	5862	C00097	HMDB00574	0.000837	0.000501	0.0951692	-0.00562	0.007144	0.431535	0.001583	0.000624	0.0114891	-0.00051	0.000845	0.546989	0.00279	0.000966	0.00391931
1898	0.75353	0.105635	1.96e-08	0.614846	proline	Amino Acid	Urea cycle; Arginine and Proline Metabolism	147-85-3	145742	C00148	HMDB00162	-0.00061	0.000436	0.162298	-0.05613	0.005999	4.08397e-20	-1e-05	0.000547	0.979294	-0.00138	0.000699	0.0497806	0.0021	0.000803	0.00897222
1899	0.308831	0.119851	0.004019	0.231964	quinolinate	Cofactors and Vitamins	Nicotinate and Nicotinamide Metabolism	89-00-9	1066	C03722	HMDB00232	0.004897	0.000795	9.96966e-10	0.001651	0.01115	0.882364	0.00501	0.001003	7.30106e-07	0.004774	0.001283	0.000227239	0.000463	0.001525	0.761311
19130	0.543495	0.116434	0.01482	0.334257	1,2-dipalmitoyl-GPC (16:0/16:0)	Lipid	Phosphatidylcholine (PC)	63-89-8	452110		HMDB00564	0.001304	0.000291	8.22424e-06	0.00067	0.004067	0.869194	0.001298	0.000352	0.000243646	0.001405	0.000516	0.0067992	-0.0002	0.000549	0.722262
19258	0.246319	0.130627	0.4499	0.17226	1-myristoyl-2-palmitoyl-GPC (14:0/16:0)	Lipid	Phosphatidylcholine (PC)	69525-80-0	129657		HMDB07869	0.000477	0.000866	0.581875	0.03628	0.01216	0.00291011	0.001408	0.001036	0.174491	-0.00147	0.001592	0.356294	0.003475	0.001686	0.0395261
19263	0.510566	0.118268	5.529e-05	0.557834	1-palmitoyl-2-oleoyl-GPE (16:0/18:1)	Lipid	Phosphatidylethanolamine (PE)	26662-94-2	5283496		HMDB05320	-0.00194	0.001005	0.0533279	0.01694	0.01386	0.221827	-0.0007	0.001199	0.559177	-0.00417	0.001843	0.0242322	0.003331	0.001852	0.0722245
19324	0.218045	0.128918	0.3769	0.0028263	1-stearoyl-GPI (18:0)	Lipid	Lysophospholipid	796963-93-4			HMDB61696	-0.00072	0.000806	0.373868	0.0862	0.01131	5.27921e-14	-0.00086	0.000978	0.378761	-0.00083	0.001448	0.568224	-0.00085	0.001593	0.594739
19503	0.364659	0.13128	0.009159	0.240534	stearoyl sphingomyelin (d18:1/18:0)	Lipid	Sphingolipid Metabolism	85187-10-6;85187-10-6	6453725	C00550	HMDB01348	0.001379	0.000364	0.000156802	0.04712	0.005107	1.27951e-19	0.001789	0.000451	7.97828e-05	0.000575	0.000618	0.353337	0.001241	0.000693	0.0734401
20675	0.517434	0.102612	1.593e-08	0.592547	1,5-anhydroglucitol (1,5-AG)	Carbohydrate	Glycolysis, Gluconeogenesis, and Pyruvate Metabolism	154-58-5	64960	C07326	HMDB02712	-0.00087	0.000848	0.305439	-0.04843	0.01181	4.37187e-05	-0.00087	0.001015	0.390598	-0.00147	0.001509	0.329603	-0.00053	0.001499	0.72151
20676	0.335073	0.1236	0.06479	0.194777	maleate	Lipid	Fatty Acid, Dicarboxylate	110-16-7	444266	C01384	HMDB00176	0.003356	0.000865	0.000111926	-0.00302	0.01199	0.801323	0.00288	0.001018	0.00479254	0.004456	0.001626	0.00647878	-0.00061	0.001639	0.709588
20693	0.229636	0.128832	0.1086	0.173143	tartronate (hydroxymalonate)	Xenobiotics	Bacterial/Fungal	80-69-3	45	C02287	HMDB35227	0.002643	0.00092	0.00415035	0.05932	0.01292	4.86932e-06	0.002859	0.001114	0.0104742	0.002681	0.001614	0.097659	-0.00012	0.001758	0.945614
20694	0.397852	0.1197	0.0006339	0.410313	oxalate (ethanedioate)	Cofactors and Vitamins	Ascorbate and Aldarate Metabolism	144-62-7	971	C00209	HMDB02329	0.002476	0.000667	0.000216209	0.06724	0.009322	9.80782e-13	0.003119	0.000805	0.000116976	0.001428	0.001177	0.225952	0.001598	0.001263	0.205889
20699	0.302702	0.124398	0.01885	0.265398	erythritol	Xenobiotics	Food Component/Plant	149-32-6	222285	C00503	HMDB02994	0.004834	0.000836	9.62758e-09	0.01513	0.01152	0.189274	0.004926	0.001056	3.66972e-06	0.004598	0.001326	0.000593763	0.001173	0.001614	0.467605
21025	0.780967	0.103586	0.03247	0.351166	iminodiacetate (IDA)	Xenobiotics	Chemical	142-73-4	8897	C19911	HMDB11753	0.000361	0.000348	0.300139	-0.00382	0.00483	0.429531	0.001138	0.000445	0.0107922	-0.00118	0.000534	0.0277984	0.002224	0.000687	0.00124061
21151	0.211095	0.117611	0.1004	0.149642	saccharin	Xenobiotics	Food Component/Plant	81-07-2	5143	D01085	HMDB29723	0.004624	0.002609	0.0766085	0.04174	0.03631	0.250597	0.001997	0.003194	0.531867	0.008101	0.004558	0.076375	-0.00863	0.005046	0.0873291
21184	0.164938	0.113339	0.1147	0.154757	1-oleoylglycerol (18:1)	Lipid	Monoacylglycerol	111-03-5	5283468		HMDB11567	-0.00027	0.001033	0.792844	0.01057	0.01448	0.465445	0.000469	0.001255	0.708597	-0.00187	0.001794	0.298884	0.003365	0.002055	0.101756
2125	0.415424	0.110828	1.611e-05	0.353714	taurine	Amino Acid	Methionine, Cysteine, SAM and Taurine Metabolism	107-35-7	1123	C00245	HMDB00251	0.000895	0.000462	0.05261	0.04084	0.006384	2.29347e-10	0.001298	0.000571	0.0232326	0.000211	0.000788	0.789315	0.001276	0.000885	0.149364
2132	0.415201	0.108992	9.134e-05	0.452495	citrulline	Amino Acid	Urea cycle; Arginine and Proline Metabolism	372-75-8	9750	C00327	HMDB00904	0.001662	0.000351	2.39888e-06	0.002332	0.004881	0.632935	0.00202	0.000443	6.01091e-06	0.001081	0.000563	0.0554766	0.001131	0.000661	0.0874548
2137	0.671411	0.104884	2.017e-07	0.579171	biliverdin	Cofactors and Vitamins	Hemoglobin and Porphyrin Metabolism	55482-27-4;55482-27-4	5353439	C00500	HMDB01008	0.003442	0.000788	1.35018e-05	-0.1275	0.01088	4.75514e-30	0.00359	0.000942	0.000148437	0.003131	0.001461	0.0327255	-1e-05	0.001452	0.992157
22001	0.273687	0.120364	0.03738	0.211626	3-hydroxyoctanoate	Lipid	Fatty Acid, Monohydroxy	88930-08-9	26613		HMDB01954	0.003331	0.000757	1.20036e-05	-0.01366	0.01063	0.199025	0.002789	0.000902	0.00207688	0.003988	0.001396	0.00452194	-0.00178	0.001477	0.227528
22036	0.281906	0.133406	0.08691	0.304956	2-hydroxyoctanoate	Lipid	Fatty Acid, Monohydroxy	617-73-2	94180		HMDB02264	-0.00124	0.001144	0.278972	0.003495	0.016	0.827114	-0.00115	0.001419	0.418698	-0.00178	0.001939	0.359946	0.001419	0.002255	0.529262
22053	0.279716	0.123301	0.08195	0.19953	3-hydroxydecanoate	Lipid	Fatty Acid, Monohydroxy	5561-87-5	26612		HMDB02203	0.004024	0.000797	5.26531e-07	0.01249	0.01125	0.267181	0.004162	0.00096	1.6567e-05	0.003736	0.001446	0.0101576	0.000252	0.001559	0.871731
22116	0.371037	0.122516	0.00171	0.342168	4-methyl-2-oxopentanoate	Amino Acid	Leucine, Isoleucine and Valine Metabolism	816-66-0	70	C00233	HMDB00695	-0.00177	0.000396	8.14707e-06	-0.09514	0.005501	8.4138e-60	-0.00143	0.000484	0.00328268	-0.00263	0.000695	0.000177068	0.000698	0.000744	0.348504
22130	0.688866	0.101942	0.5	0.312645	phenyllactate (PLA)	Amino Acid	Phenylalanine Metabolism	828-01-3	3848	C05607	HMDB00779	-0.00049	0.000575	0.39136	-0.1306	0.00797	2.06785e-54	8.4e-05	0.000693	0.904072	-0.00109	0.001039	0.296353	0.001401	0.001064	0.188276
22132	0.249236	0.133991	0.3267	0.120183	alpha-hydroxyisocaproate	Amino Acid	Leucine, Isoleucine and Valine Metabolism	10303-64-7	83697	C03264	HMDB00746	-0.00182	0.00055	0.00093879	-0.1522	0.007708	9.93687e-75	-0.00116	0.000658	0.0776583	-0.00327	0.000994	0.00111475	0.002097	0.001062	0.0484486
22137	0.703641	0.107834	1.163e-08	0.750956	homoarginine	Amino Acid	Urea cycle; Arginine and Proline Metabolism	156-86-5	9085	C01924	HMDB00670	-0.00321	0.000677	2.2739e-06	-0.1127	0.009375	1.61439e-31	-0.00347	0.000846	4.45965e-05	-0.00232	0.001116	0.0382574	-0.00044	0.001231	0.719861
22138	0.258341	0.112319	0.01336	0.243465	homocitrulline	Amino Acid	Urea cycle; Arginine and Proline Metabolism	1190-49-4	65072	C02427	HMDB00679	0.004271	0.001219	0.000479483	0.00378	0.01692	0.823248	0.005572	0.001489	0.000196708	0.002409	0.002128	0.258443	0.002959	0.002385	0.214989
22163	0.407172	0.114158	0.2317	0.476213	EDTA	Xenobiotics	Chemical	60-00-4	6049	C00284	HMDB15109	-0.0001	0.000191	0.614137	-0.02564	0.002632	1.3674e-21	5.7e-05	0.000229	0.803167	-0.00038	0.000347	0.277502	0.000468	0.000368	0.203454
22176	0.467681	0.114712	3.496e-05	0.472795	cysteine s-sulfate	Amino Acid	Methionine, Cysteine, SAM and Taurine Metabolism	1637-71-4	115015	C05824	HMDB00731	0.002229	0.000722	0.0020655	-0.01268	0.009907	0.200982	0.002748	0.000899	0.00230822	0.001257	0.001214	0.301006	0.002113	0.001386	0.127717
22185	0.304199	0.112499	0.001977	0.289026	N-acetylaspartate (NAA)	Amino Acid	Alanine and Aspartate Metabolism	997-55-7;997-55-7	65065	C01042	HMDB00812	0.001575	0.000268	5.38646e-09	0.02584	0.003725	6.63272e-12	0.001745	0.000332	1.90255e-07	0.001173	0.000446	0.0089283	-2e-05	0.000519	0.964318
22842	0.48124	0.120832	0.01319	0.266762	cholate	Lipid	Primary Bile Acid Metabolism	81-25-4	221493	C00695	HMDB00619	0.005275	0.002545	0.0384412	-0.1823	0.03559	3.49521e-07	0.005066	0.003057	0.0978482	0.005972	0.004635	0.198358	-0.00099	0.004936	0.840847
2342	0.284903	0.105997	0.0007003	0.370863	serotonin	Amino Acid	Tryptophan Metabolism	153-98-0	5202	C00780	HMDB00259	-0.00298	0.002547	0.242148	0.01757	0.03511	0.616795	-0.00291	0.003167	0.359246	-0.00202	0.004322	0.640208	0.000152	0.004864	0.975087
2730	0.504298	0.114612	0.001132	0.298164	gamma-glutamylglutamine	Peptide	Gamma-glutamyl Amino Acid	10148-81-9	150914	C05283	HMDB11738	0.001118	0.000386	0.00381029	-0.00612	0.005388	0.256285	0.001511	0.000453	0.000898519	6.5e-05	0.000714	0.928012	0.001188	0.000744	0.110606
2734	0.253179	0.117305	0.2523	0.13641	gamma-glutamyltyrosine	Peptide	Gamma-glutamyl Amino Acid	7432-23-7	94340		HMDB11741	0.002362	0.00053	9.33213e-06	-0.03759	0.007362	3.83041e-07	0.002727	0.000665	4.56615e-05	0.001797	0.000873	0.0402333	0.001255	0.001026	0.221243
27447	0.356507	0.119512	0.5	0.0568182	1-linoleoylglycerol (18:2)	Lipid	Monoacylglycerol	2277-28-3	5283469			0.00232	0.000839	0.00576694	0.03971	0.01176	0.000753411	0.003601	0.000986	0.00027897	-0.00056	0.001555	0.716976	0.003963	0.00165	0.0164791
27513	0.309066	0.117176	0.009849	0.318843	indoleacetate	Amino Acid	Tryptophan Metabolism	6505-45-9	802	C00954	HMDB00197	0.000202	0.000826	0.80671	-0.0699	0.01159	2.18594e-09	0.000648	0.001024	0.526884	-0.00056	0.001417	0.691737	0.001154	0.001595	0.469456
2761	0.772851	0.098277	2.005e-05	0.543488	thyroxine	Amino Acid	Tyrosine Metabolism	51-48-9	5819	C01829	HMDB01918	0.000605	0.000404	0.134102	0.05964	0.005611	2.82838e-25	0.000773	0.000486	0.112014	0.0004	0.00073	0.584162	0.000565	0.000741	0.446049
27665	0.03428	0.111253	0.5	0.0138957	1-methylnicotinamide	Cofactors and Vitamins	Nicotinate and Nicotinamide Metabolism	1005-24-9	10129985	C02918	HMDB00699	-0.00188	0.000902	0.0374838	-0.0139	0.01286	0.279921	-0.00213	0.001038	0.0407144	-0.00161	0.001851	0.384205	-0.00021	0.001802	0.905392
27672	0.590496	0.114758	0.5	0.0287849	3-indoxyl sulfate	Amino Acid	Tryptophan Metabolism	2642-37-7	10258		HMDB00682	0.000303	0.000933	0.745458	-0.00922	0.01313	0.482525	6.9e-05	0.001184	0.953791	0.00055	0.001537	0.72089	-0.00011	0.001792	0.952314
27710	0.54241	0.123571	0.02697	0.218442	N-acetylglycine	Amino Acid	Glycine, Serine and Threonine Metabolism	543-24-8	10972		HMDB00532	0.002194	0.000897	0.0146211	0.1176	0.01246	2.06957e-20	0.002548	0.001175	0.0304254	0.001848	0.001272	0.147016	-0.00015	0.001673	0.928668
27718	0.761279	0.103897	0.0005822	0.457874	creatine	Amino Acid	Creatine Metabolism	57-00-1	586	C00300	HMDB00064	0.001179	0.000731	0.107285	0.1707	0.01014	4.29157e-57	0.001938	0.000887	0.0292426	-0.00076	0.001259	0.546702	0.001876	0.001308	0.151621
27719	0.286154	0.120458	0.5	0.0634417	galactonate	Carbohydrate	Fructose, Mannose and Galactose Metabolism	299-28-5	128869	C00880	HMDB00565	0.008819	0.002565	0.000610576	-0.05107	0.03614	0.157937	0.009037	0.003152	0.00426518	0.0101	0.004476	0.0246961	0.00316	0.005105	0.535958
27731	0.287478	0.114273	0.00674	0.269788	ribonate	Carbohydrate	Pentose Metabolism	1255190	5460677	C01685	HMDB00867	0.003314	0.000518	2.30463e-10	0.02288	0.007255	0.00165072	0.004116	0.000642	2.6205e-10	0.001707	0.000868	0.0501659	0.002311	0.001009	0.0221227
27738	0.324793	0.119126	0.1369	0.258027	threonate	Cofactors and Vitamins	Ascorbate and Aldarate Metabolism	70753-61-6	151152	C01620	HMDB00943	0.002506	0.00074	0.000732487	0.05025	0.01041	1.56265e-06	0.003043	0.000904	0.000799188	0.001449	0.001294	0.263615	0.001502	0.001461	0.303969
2829	0.359683	0.116496	0.05051	0.249588	N-formylmethionine	Amino Acid	Methionine, Cysteine, SAM and Taurine Metabolism	4289-98-9	439750	C03145	HMDB01015	0.00203	0.000376	8.37784e-08	-0.00653	0.005247	0.213778	0.002089	0.000459	6.2832e-06	0.001906	0.000661	0.00413562	9e-05	0.000708	0.898703
30460	0.274912	0.100197	0.04955	0.224223	1-methylhistidine	Amino Acid	Histidine Metabolism	332-80-9	92105	C01152	HMDB00001	0.004642	0.000815	1.58091e-08	-0.01671	0.01127	0.138283	0.006141	0.001004	1.48621e-09	0.001995	0.001376	0.147972	0.004829	0.001534	0.00167763
3127	0.766753	0.10164	1.724e-12	0.701928	hypoxanthine	Nucleotide	Purine Metabolism, (Hypo)Xanthine/Inosine containing	68-94-0	790	C00262	HMDB00157	-0.00041	0.000918	0.657666	-0.02148	0.01259	0.0882464	-0.00016	0.001126	0.88796	-0.0008	0.001603	0.61985	0.00083	0.001731	0.631603
3141	0.459438	0.111923	0.03877	0.32579	betaine	Amino Acid	Glycine, Serine and Threonine Metabolism	107-43-7	247	C00719	HMDB00043	0.000249	0.000367	0.497407	-0.04762	0.005116	6.08389e-20	0.000125	0.00046	0.786383	0.000271	0.000594	0.648145	-0.00028	0.000688	0.688
3147	0.578965	0.118159	0.5	0.301044	xanthine	Nucleotide	Purine Metabolism, (Hypo)Xanthine/Inosine containing	69-89-6	1188	C00385	HMDB00292	0.000492	0.000658	0.454182	-0.04992	0.009187	6.67081e-08	8.5e-05	0.000737	0.907988	0.001514	0.001375	0.271938	-0.0023	0.001232	0.0618309
31536	0.398626	0.120857	0.008612	0.267441	N-(2-furoyl)glycine	Xenobiotics	Food Component/Plant	5657-19-2;5657-19-2	21863		HMDB00439	0.004529	0.001941	0.0198027	-0.1778	0.02692	6.19551e-11	0.00412	0.002417	0.0886228	0.005288	0.003217	0.101114	-0.00044	0.003717	0.90672
3155	0.181817	0.108686	0.4727	0.151843	3-ureidopropionate	Nucleotide	Pyrimidine Metabolism, Uracil containing	462-88-4	111	C02642	HMDB00026	0.002933	0.000787	0.000202917	-0.09963	0.01113	1.36756e-18	0.001386	0.000956	0.147446	0.005787	0.001405	4.71619e-05	-0.0041	0.0015	0.00630438
31555	0.53862	0.115154	0.001366	0.382919	pyridoxate	Cofactors and Vitamins	Vitamin B6 Metabolism	82-82-6	6723	C00847	HMDB00017	0.004809	0.001269	0.000158262	-0.01443	0.01761	0.412666	0.00458	0.001586	0.00399097	0.005421	0.002111	0.0106674	-0.00157	0.002429	0.519225
31591	0.334868	0.111643	0.001722	0.362155	androsterone sulfate	Lipid	Androgenic Steroids	2479-86-9	159663		HMDB02759	-0.01478	0.001816	9.79884e-16	-0.2272	0.02557	2.27758e-18	-0.01694	0.002403	3.84301e-12	-0.01041	0.00245	2.6983e-05	-0.00664	0.002972	0.0256028
31787	0.320386	0.121687	0.0143	0.376337	3-carboxy-4-methyl-5-propyl-2-furanpropanoate (CMPF)	Lipid	Fatty Acid, Dicarboxylate	86879-39-2	123979		HMDB61112	0.01949	0.002432	2.71054e-15	0.004436	0.03402	0.896287	0.02054	0.002958	7.8742e-12	0.01796	0.004253	3.04717e-05	-0.00021	0.004478	0.963152
31912	0.505247	0.115774	0.263	0.240064	glycolithocholate	Lipid	Secondary Bile Acid Metabolism	474-74-8	115245	C15557	HMDB00698	0.003441	0.001796	0.0556792	0.1123	0.02515	8.79633e-06	0.001767	0.002255	0.433601	0.007154	0.002935	0.0152904	-0.00479	0.003486	0.169821
31932	0.264819	0.121401	0.03325	0.231321	propionylglycine	Lipid	Fatty Acid Metabolism (also BCAA Metabolism)	21709-90-0	98681		HMDB00783	0.002833	0.001383	0.0406782	0.08845	0.01929	5.04385e-06	0.004014	0.001709	0.0190731	0.000616	0.002355	0.793923	0.001515	0.002665	0.569831
31938	0.281209	0.119846	0.02541	0.167435	5-hydroxyhexanoate	Lipid	Fatty Acid, Monohydroxy	44843-89-2	170748		HMDB00525	0.006472	0.001749	0.000224878	0.005076	0.02442	0.835367	0.003722	0.002168	0.0865206	0.01239	0.002947	3.30725e-05	-0.00924	0.003373	0.00624023
31943	0.423553	0.132493	0.004605	0.256565	3-hydroxysebacate	Lipid	Fatty Acid, Monohydroxy	73141-46-5	3017884		HMDB00350	0.009746	0.001703	1.34389e-08	-0.02367	0.02365	0.317178	0.00748	0.002086	0.000358834	0.01319	0.002951	1.06816e-05	-0.00645	0.003299	0.0506763
32197				0.255424	3-(4-hydroxyphenyl)lactate	Amino Acid	Tyrosine Metabolism	6482-98-0	9378	C03672	HMDB00755	-8.96e-06	0.00056	0.987244	-0.1187	0.007764	3.22408e-48	0.000526	0.000683	0.441143	-0.00087	0.000979	0.375495	0.002329	0.001044	0.0258324
32198	0.148855	0.121836	0.5	0.0419711	acetylcarnitine (C2)	Lipid	Fatty Acid Metabolism(Acyl Carnitine)	5080-50-2	1	C02571	HMDB00201	0.002678	0.000487	4.61523e-08	0.01435	0.006945	0.03905	0.003156	0.0006	1.98011e-07	0.001809	0.000855	0.0351906	0.001299	0.000968	0.179854
32306	0.42892	0.120989	0.006685	0.357575	trans-4-hydroxyproline	Amino Acid	Urea cycle; Arginine and Proline Metabolism	51-35-4	5810	C01157	HMDB00725	0.001458	0.000573	0.011115	-0.03937	0.007971	8.99956e-07	0.001703	0.000689	0.0136302	0.001508	0.001019	0.139989	0.000701	0.001124	0.532869
32328	0.539677	0.124624	6.514e-05	0.485763	hexanoylcarnitine (C6)	Lipid	Fatty Acid Metabolism(Acyl Carnitine)	6920-35-0	6426853		HMDB00705	0.004734	0.000866	5.50195e-08	0.04914	0.01192	4.00118e-05	0.005709	0.001095	2.32746e-07	0.002755	0.001348	0.0417297	0.004336	0.001584	0.00626964
32342	0.585504	0.11091	1.513e-08	0.698697	adenosine 5'-monophosphate (AMP)	Nucleotide	Purine Metabolism, Adenine containing	149022-20-8	6083	C00020	HMDB00045	0.000688	0.001804	0.703237	0.04277	0.02477	0.0844718	0.002282	0.002169	0.293231	-0.00123	0.003264	0.707121	0.004769	0.00338	0.158487
32346	0.283208	0.134777	0.5	0.105522	glycochenodeoxycholate	Lipid	Primary Bile Acid Metabolism	16564-43-5	12544	C05466	HMDB00637	0.00347	0.001743	0.0468072	-0.03971	0.02454	0.10587	0.002692	0.002196	0.22072	0.005184	0.0028	0.0649402	-0.00333	0.003358	0.321437
32350				0.392435	1-methyl-4-imidazoleacetate	Amino Acid	Histidine Metabolism	2625-49-2	75810	C05828	HMDB02820	0.005844	0.000584	1.13014e-22	-0.00638	0.008098	0.430935	0.005882	0.000716	8.55019e-16	0.005687	0.000997	2.35629e-08	-0.00033	0.001055	0.752505
32377	0.402659	0.116402	0.5	0.142336	N-acetylneuraminate	Carbohydrate	Aminosugar Metabolism	131-48-6	439197	C00270	HMDB00230	0.002472	0.000487	4.58711e-07	0.02962	0.006822	1.53821e-05	0.002226	0.000607	0.000258494	0.002517	0.000797	0.00171605	-4.29e-06	0.00093	0.996323
32388	0.392666	0.126422	0.001336	0.37291	dodecanedioate (C12-DC)	Lipid	Fatty Acid, Dicarboxylate	693-23-2	12736	C02678	HMDB00623	0.004765	0.001022	3.52258e-06	0.03299	0.0142	0.0203518	0.004784	0.001223	9.93184e-05	0.004392	0.001858	0.0185966	-0.00055	0.001962	0.781062
32390	0.436323	0.123762	0.5	0.0974362	N-acetyltyrosine	Amino Acid	Tyrosine Metabolism	537-55-3	68310		HMDB00866	0.002177	0.0012	0.069924	-0.06597	0.01671	8.31071e-05	0.002615	0.001469	0.0754091	0.001838	0.00211	0.384389	0.002149	0.002316	0.353583
32391	0.412126	0.107115	0.001345	0.257263	1,3-dimethylurate	Xenobiotics	Xanthine Metabolism	944-73-0	70346		HMDB01857	-0.0026	0.002191	0.234766	-0.03451	0.0307	0.261142	-0.00371	0.002623	0.157118	-0.00039	0.004022	0.923203	-0.00488	0.004116	0.235624
32397	0.113416	0.113494	0.3447	0	3-hydroxy-2-ethylpropionate	Amino Acid	Leucine, Isoleucine and Valine Metabolism	4374-62-3	188979		HMDB00396	0.001795	0.000522	0.000614712	-0.04991	0.007372	2.02925e-11	0.002033	0.000646	0.00173053	0.00141	0.000889	0.113806	0.000825	0.001019	0.418252
32401	0.491671	0.108588	9.461e-06	0.364774	trigonelline (N'-methylnicotinate)	Cofactors and Vitamins	Nicotinate and Nicotinamide Metabolism	535-83-1	5570	C01004	HMDB00875	0.00656	0.001822	0.000331073	0.03848	0.0254	0.130074	0.004809	0.002239	0.0319827	0.01041	0.003146	0.00102157	-0.00107	0.003315	0.747555
32405	0.419606	0.116586	0.0009972	0.504615	indolepropionate	Amino Acid	Tryptophan Metabolism	830-96-6	3744		HMDB02302	0.000538	0.001475	0.71511	-0.01324	0.02058	0.520055	-0.00093	0.00185	0.614652	0.003887	0.002382	0.103599	-0.00565	0.002823	0.0453803
32412	0.688424	0.108066	2.914e-09	0.618147	butyrylcarnitine (C4)	Lipid	Fatty Acid Metabolism (also BCAA Metabolism)	25576-40-3	439829	C02862	HMDB02013	0.003041	0.000839	0.00030073	-0.0068	0.01158	0.557136	0.00425	0.001038	4.67363e-05	0.000322	0.0014	0.818358	0.005105	0.001425	0.000350851
32415	0.16367	0.119383	0.2146	0.161665	docosadienoate (22:2n6)	Lipid	Polyunsaturated Fatty Acid (n3 and n6)	7370-49-2	5282807	C16533	HMDB61714	0.002974	0.00071	3.04079e-05	0.01411	0.00996	0.156707	0.002948	0.00085	0.000551075	0.003022	0.001297	0.0203453	-0.00073	0.001385	0.600532
32418	0.235005	0.126721	0.2731	0.188667	myristoleate (14:1n5)	Lipid	Long Chain Fatty Acid	544-64-9	5281119	C08322	HMDB02000	0.002523	0.000919	0.0061783	0.2321	0.01291	5.07562e-64	0.002646	0.00113	0.0194582	0.002575	0.001591	0.10652	0.000144	0.001788	0.935705
32425	0.457925	0.102708	1.812e-07	0.619775	dehydroisoandrosterone sulfate (DHEA-S)	Lipid	Androgenic Steroids	651-48-9	12594	C04555	HMDB01032	-0.01477	0.001276	1.78067e-29	-0.1938	0.01783	2.5575e-26	-0.01456	0.001631	2.75206e-18	-0.01606	0.001987	8.66872e-15	0.000989	0.002099	0.637498
32426	0.3288	0.110234	0.02969	0.338011	I-urobilinogen	Cofactors and Vitamins	Hemoglobin and Porphyrin Metabolism	14684-37-8	26818	C05790	HMDB04157	0.002165	0.001991	0.277051	-0.0553	0.02783	0.0471509	0.004067	0.002329	0.0812671	-0.00134	0.003744	0.721501	0.006832	0.003818	0.0737279
32445	0.306199	0.102047	0.001529	0.242889	3-methylxanthine	Xenobiotics	Xanthine Metabolism	1076-22-8	70639	C16357	HMDB01886	0.000605	0.001724	0.725584	0.06375	0.02402	0.00807161	0.000466	0.002106	0.824902	0.001373	0.003012	0.648747	0.000589	0.003355	0.860789
32446	0.343232	0.125505	0.2569	0.28332	guanidinosuccinate	Amino Acid	Guanidino and Acetamido Metabolism	6133-30-8	97856	C03139	HMDB03157	0.009181	0.001807	4.43025e-07	0.02267	0.02536	0.371606	0.0104	0.002232	3.67482e-06	0.008003	0.00312	0.0107159	0.003351	0.003321	0.313118
32452	0.271626	0.118632	0.02664	0.226159	propionylcarnitine (C3)	Lipid	Fatty Acid Metabolism (also BCAA Metabolism)	17298-37-2	107738	C03017	HMDB00824	0.00145	0.000528	0.00613209	-0.07407	0.00736	6.6947e-23	0.001839	0.000647	0.0046135	0.000929	0.000917	0.31162	0.001763	0.000996	0.076968
32457	0.445288	0.124964	0.1333	0.214465	3-hydroxylaurate	Lipid	Fatty Acid, Monohydroxy	53941-38-1	94216		HMDB00387	0.004793	0.000918	2.1255e-07	0.03908	0.0129	0.00250926	0.005242	0.001096	2.07801e-06	0.004038	0.001692	0.0174947	0.001142	0.001792	0.52411
32489	0.125817	0.121701	0.4162	0.0175095	caproate (6:0)	Lipid	Medium Chain Fatty Acid	142-62-1	8892	C01585	HMDB00535	0.000113	0.000642	0.860342	0.02815	0.008924	0.00165111	-3e-05	0.000801	0.973315	0.001017	0.001048	0.332508	0.000134	0.001262	0.915146
32492				0.174264	caprylate (8:0)	Lipid	Medium Chain Fatty Acid	124-07-2	379	C06423	HMDB00482	0.000758	0.001166	0.515761	0.06404	0.01626	8.63935e-05	0.001585	0.00146	0.278087	-0.00022	0.001913	0.910155	0.002561	0.002289	0.263318
32497	0.582613	0.120104	0.002808	0.372081	10-undecenoate (11:1n1)	Lipid	Medium Chain Fatty Acid	1333-28-4	14891	C13910	HMDB33724	0.001594	0.000761	0.0363986	0.006024	0.01055	0.568178	0.002163	0.000902	0.0167488	0.000318	0.001404	0.820865	0.001944	0.001444	0.178481
32504	0.383651	0.122337	0.007565	0.319841	docosapentaenoate (n3 DPA; 22:5n3)	Lipid	Polyunsaturated Fatty Acid (n3 and n6)	2234-74-4	6441454	C16513	HMDB06528	0.004601	0.000967	2.19878e-06	0.1078	0.01352	3.57063e-15	0.0057	0.001199	2.3613e-06	0.002725	0.001617	0.0926831	0.002559	0.00185	0.166949
32506	0.333546	0.126686	0.2746	0.184848	2-linoleoylglycerol (18:2)	Lipid	Monoacylglycerol	3443-82-1	5365676		HMDB11538	0.002153	0.001862	0.24792	0.03381	0.02591	0.192254	0.002277	0.002293	0.321068	0.001524	0.003202	0.634322	0.002109	0.003669	0.565471
32553	0.311754	0.120678	0.1728	0.149089	phenol sulfate	Amino Acid	Tyrosine Metabolism	937-34-8	74426	C02180	HMDB60015	0.002474	0.001227	0.0440963	0.01488	0.01722	0.387637	0.004995	0.001491	0.00085014	-0.00274	0.002156	0.20414	0.006908	0.002387	0.00386242
32562	0.611163	0.101367	1.619e-06	0.599966	pregnen-diol disulfate C21H34O8S2*	Lipid	Pregnenolone Steroids					-0.00722	0.001319	5.30354e-08	-0.2847	0.01828	6.18966e-50	-0.00862	0.00169	4.21281e-07	-0.00503	0.001999	0.0122111	-0.00425	0.002373	0.07365
32578	0.432191	0.125871	0.04496	0.100844	X - 11261	Unknown						0.00302	0.000936	0.00129039	-0.00709	0.01306	0.587357	0.003923	0.001163	0.000776339	0.000726	0.001564	0.642755	0.002533	0.001767	0.151818
32586	0.714709	0.10199	1.363e-05	0.566472	bilirubin (E,E)*	Cofactors and Vitamins	Hemoglobin and Porphyrin Metabolism	114-25-0	5315454			0.003394	0.000923	0.000248555	-0.08732	0.01277	1.29468e-11	0.003299	0.001129	0.00356414	0.003408	0.001622	0.0363072	-0.00127	0.001701	0.454337
32619	0.529075	0.103116	2.869e-06	0.545349	pregn steroid monosulfate C21H34O5S*	Lipid	Pregnenolone Steroids	1247-64-9				-0.00871	0.001162	1.24791e-13	-0.2589	0.01623	4.30982e-52	-0.00934	0.001476	4.0308e-10	-0.0076	0.001793	2.82683e-05	-0.00143	0.002015	0.478296
32620	0.246108	0.122271	0.2042	0.200187	glycolithocholate sulfate*	Lipid	Secondary Bile Acid Metabolism	15324-64-8	72222	C11301	HMDB02639	0.002915	0.001469	0.0474949	0.01487	0.0206	0.470344	0.001131	0.001847	0.540318	0.006518	0.002388	0.00666268	-0.0061	0.002856	0.0327708
32807	0.807903	0.098901	0.0001436	0.464938	taurocholenate sulfate	Lipid	Secondary Bile Acid Metabolism					0.000702	0.001121	0.531076	0.001472	0.0156	0.924881	0.00036	0.001347	0.789435	0.001511	0.002021	0.455091	-0.00146	0.002136	0.493697
32827	0.534787	0.126153	0.0001697	0.363445	andro steroid monosulfate C19H28O6S (1)*	Lipid	Androgenic Steroids			C04555	HMDB02759	-0.01099	0.001962	2.66459e-08	-0.206	0.02742	1.125e-13	-0.01092	0.002475	1.17138e-05	-0.0127	0.003139	6.43919e-05	0.001417	0.003432	0.679685
32980	0.402416	0.125406	0.00258	0.309791	adrenate (22:4n6)	Lipid	Polyunsaturated Fatty Acid (n3 and n6)	2091-25-0	5497181	C16527	HMDB02226	0.000667	0.000905	0.461601	0.05051	0.01259	6.40929e-05	0.001469	0.001089	0.177622	-0.00119	0.001654	0.472371	0.002724	0.001779	0.125898
33009	0.625955	0.093116	5.807e-05	0.48634	homostachydrine*	Xenobiotics	Food Component/Plant	1195-94-4	441447	C08283	HMDB33433	0.002719	0.001219	0.0258589	0.005934	0.01682	0.724356	0.003488	0.001488	0.0193049	0.001146	0.002139	0.592248	0.002303	0.00235	0.327234
33132	0.418079	0.13335	0.006352	0.393937	X - 11787	Unknown						0.001996	0.00034	5.82964e-09	-0.02321	0.004736	1.08818e-06	0.002406	0.000425	2.12934e-08	0.000993	0.000559	0.0765869	0.001564	0.000619	0.0116891
33140	0.588194	0.127607	0.003982	0.386569	X - 11795	Unknown						0.001601	0.001146	0.16268	-0.1293	0.01578	6.79053e-16	0.002173	0.001395	0.119751	0.000507	0.002006	0.80061	0.000565	0.002127	0.790508
33173	0.251616	0.120287	0.5	0.1175	2-hydroxyacetaminophen sulfate*	Xenobiotics	Drug - Analgesics, Anesthetics		86290013			0.001208	0.003828	0.752473	0.2073	0.0539	0.000126258	-0.003	0.0049	0.540097	0.01154	0.006128	0.06061	-0.01039	0.007549	0.168894
33228	0.365287	0.1235	0.004834	0.39026	1-arachidonoyl-GPC (20:4n6)*	Lipid	Lysophospholipid			C05208	HMDB10395	-9e-05	0.000601	0.876548	0.01927	0.008396	0.0219372	0.000702	0.000742	0.344772	-0.00174	0.001021	0.0888675	0.002412	0.001065	0.0236213
33230	0.506528	0.123843	0.01873	0.330712	1-palmitoleoyl-GPC (16:1)*	Lipid	Lysophospholipid		24779461		HMDB10383	6.7e-05	0.000546	0.901809	0.03692	0.007595	1.32487e-06	0.000802	0.000651	0.217985	-0.00156	0.000997	0.118184	0.002548	0.001021	0.0126952
33364	0.571538	0.108581	0.04804	0.330743	gamma-glutamylthreonine	Peptide	Gamma-glutamyl Amino Acid	5652-48-2	76078708		HMDB29159	0.000645	0.000486	0.1852	-0.00859	0.006772	0.204676	0.000818	0.000595	0.169551	0.000549	0.000842	0.515014	0.000747	0.000948	0.430896
33384	0.363727	0.128121	0.08477	0.207913	salicyluric glucuronide*	Xenobiotics	Drug - Analgesics, Anesthetics					0.02079	0.004067	3.79812e-07	-0.07241	0.05682	0.202802	0.0138	0.004964	0.00557462	0.03421	0.007044	1.76893e-06	-0.01946	0.007863	0.0134611
33422	0.166585	0.120815	0.5	0.0351271	gamma-glutamylphenylalanine	Peptide	Gamma-glutamyl Amino Acid	7432-24-8	111299		HMDB00594	0.00281	0.000453	7.67078e-10	-0.04393	0.006346	7.27204e-12	0.003395	0.000556	1.72264e-09	0.001675	0.00078	0.0324422	0.001545	0.000885	0.0811569
33441	0.592152	0.105442	0.2588	0.36094	isobutyrylcarnitine (C4)	Amino Acid	Leucine, Isoleucine and Valine Metabolism	25518-49-4	168379		HMDB00736	0.0027	0.000908	0.00301646	-0.02955	0.01257	0.0188491	0.003295	0.001103	0.00290058	0.001625	0.001608	0.312993	0.002018	0.001688	0.232235
33442	0.387436	0.123371	0.001885	0.306436	pseudouridine	Nucleotide	Pyrimidine Metabolism, Uracil containing	1445-07-4	15047	C02067	HMDB00767	0.002531	0.000372	1.54192e-11	-0.00677	0.005162	0.189961	0.002628	0.000464	2.07969e-08	0.002292	0.000599	0.000153947	0.000159	0.0007	0.82031
33447	0.286673	0.121215	0.2369	0.204323	palmitoleate (16:1n7)	Lipid	Long Chain Fatty Acid	373-49-9	445638	C08362	HMDB03229	0.003057	0.001029	0.00303185	0.2162	0.01446	2.38541e-46	0.002703	0.001209	0.0256647	0.004093	0.001921	0.0337547	-0.00182	0.00201	0.365506
33487	0.051453	0.125913	0.5	0	glutamate, gamma-methyl ester	Amino Acid	Glutamate Metabolism	1499-55-4;1499-55-4	68662		HMDB61715	0.001637	0.001042	0.11662	-0.03512	0.01467	0.0168392	0.001119	0.001268	0.377933	0.003084	0.001878	0.10155	-0.00157	0.002094	0.452262
33587	0.251868	0.118914	0.4049	0.182758	eicosenoate (20:1)	Lipid	Long Chain Fatty Acid		5282768	C16526	HMDB02231	0.003618	0.000815	9.89547e-06	0.0468	0.01138	4.16365e-05	0.003632	0.000974	0.000204416	0.003666	0.00148	0.0136779	-0.00032	0.001587	0.838776
33904	0.612527	0.124043	0.003817	0.322829	X - 12459	Unknown						0.004156	0.001095	0.000154294	0.02887	0.01506	0.0555359	0.005654	0.001415	6.97989e-05	0.001211	0.0016	0.449471	0.006326	0.002001	0.00159983
33934	0.462649	0.12221	0.0004193	0.429388	gamma-glutamyl-epsilon-lysine	Peptide	Gamma-glutamyl Amino Acid	17105-15-6	7015685		HMDB03869	0.001694	0.000532	0.00150635	-0.01635	0.007385	0.0270091	0.002178	0.000662	0.00105329	0.000357	0.000902	0.692327	0.002025	0.001043	0.0524207
33935	0.163263	0.12891	0.5	0.0292548	piperine	Xenobiotics	Food Component/Plant	94-62-2	638024	C03882	HMDB29377	0.001096	0.002101	0.602216	-0.1563	0.02952	1.43657e-07	0.001197	0.002579	0.642678	0.002404	0.003624	0.507466	-0.00264	0.004076	0.517499
33936	0.700599	0.141305	0.5	0.44054	octanoylcarnitine (C8)	Lipid	Fatty Acid Metabolism(Acyl Carnitine)	3671-77-0	123701	C02838	HMDB00791	0.004634	0.001022	6.41617e-06	0.05711	0.01407	5.25567e-05	0.005672	0.001309	1.64244e-05	0.002446	0.001555	0.116597	0.004034	0.001857	0.0299988
33937	0.160837	0.134418	0.2866	0.101491	alpha-hydroxyisovalerate	Amino Acid	Leucine, Isoleucine and Valine Metabolism	600-37-3	99823		HMDB00407	-0.00112	0.000841	0.181138	-0.1117	0.01176	1.20276e-20	-0.00019	0.001011	0.850346	-0.00255	0.001515	0.0931069	0.003972	0.001501	0.0082389
33939	0.328355	0.122835	0.007612	0.262162	N-acetylthreonine	Amino Acid	Glycine, Serine and Threonine Metabolism	17093-74-2	152204			0.002315	0.000366	3.84244e-10	-0.00258	0.005116	0.614034	0.002613	0.000463	2.31822e-08	0.001846	0.000576	0.00148893	0.000616	0.000696	0.376327
33941	0.728964	0.147954	0.5	0.382996	decanoylcarnitine (C10)	Lipid	Fatty Acid Metabolism(Acyl Carnitine)	1492-27-9	10245190		HMDB00651	0.004791	0.001027	3.41175e-06	0.05758	0.01413	4.9334e-05	0.006131	0.001291	2.41425e-06	0.002051	0.001645	0.213347	0.004236	0.001897	0.0256671
33942	0.03813	0.119628	0.5	0	N-acetylasparagine	Amino Acid	Alanine and Aspartate Metabolism	4033-40-3	99715		HMDB06028	0.001697	0.000569	0.00291348	0.01831	0.008102	0.0239889	0.001968	0.000667	0.0032653	0.000906	0.001091	0.406826	0.000422	0.00115	0.713318
33943	0.598351	0.112401	2.533e-06	0.55488	N-acetylglutamine	Amino Acid	Glutamate Metabolism	2490-97-3	182230	C02716	HMDB06029	0.002771	0.000803	0.000576395	-0.00508	0.01108	0.646923	0.002172	0.000966	0.0248598	0.004397	0.001438	0.00238849	-0.00113	0.001415	0.424459
33946				0.4008	N-acetylhistidine	Amino Acid	Histidine Metabolism	39145-52-3	75619	C02997	HMDB32055	0.002096	0.000765	0.00620571	-0.02487	0.01059	0.0189932	0.00204	0.000947	0.0315691	0.002012	0.001276	0.115612	2.274e-06	0.001389	0.998694
33947	0.621905	0.098358	0.5	0.170611	gamma-glutamyltryptophan	Peptide	Gamma-glutamyl Amino Acid	66471-20-3	3989307		HMDB29160	0.002614	0.000938	0.00541328	-0.03397	0.0131	0.00961064	0.003658	0.001133	0.00129557	0.000641	0.001697	0.705871	0.002237	0.001809	0.216315
33949	0.61882	0.118645	2.568e-06	0.623409	gamma-glutamylglycine	Peptide	Gamma-glutamyl Amino Acid	1948-29-4	165527		HMDB11667	0.002207	0.000617	0.000365299	0.09147	0.008526	1.11856e-25	0.00276	0.0008	0.000587577	0.001439	0.000907	0.113482	0.000912	0.001137	0.422314
33950	0.34307	0.126528	0.01622	0.254002	N-acetylphenylalanine	Amino Acid	Phenylalanine Metabolism	2018-61-3	74839	C03519	HMDB00512	0.001966	0.000739	0.00787988	-0.1029	0.01024	7.63255e-23	0.001423	0.000885	0.108422	0.003947	0.00133	0.00318438	-0.00123	0.001365	0.368448
33952	0.41595	0.143268	0.09862	0.194252	myristoylcarnitine (C14)	Lipid	Fatty Acid Metabolism(Acyl Carnitine)	18822-89-4	6426854		HMDB05066	0.004887	0.000667	4.68525e-13	-0.00645	0.009258	0.486413	0.006113	0.000802	7.23122e-14	0.002432	0.001186	0.0411222	0.004121	0.001255	0.00104878
33953	0.606597	0.114814	1.677e-07	0.529333	N-acetylarginine	Amino Acid	Urea cycle; Arginine and Proline Metabolism	155-84-0	67427	C02562	HMDB04620	0.002998	0.000714	2.87972e-05	0.005236	0.009913	0.597503	0.002934	0.00086	0.000676078	0.003818	0.001279	0.00302283	-0.0001	0.001246	0.937406
33955	0.365785	0.12207	0.02234	0.283793	1-palmitoyl-GPC (16:0)	Lipid	Lysophospholipid	17364-16-8	86554		HMDB10382	0.000104	0.000295	0.724415	0.00019	0.004104	0.963055	0.000662	0.000354	0.0616987	-0.00106	0.000528	0.0451852	0.001936	0.00056	0.000562025
33959	0.526519	0.114704	0.001125	0.353707	N-acetyltryptophan	Amino Acid	Tryptophan Metabolism	1218-34-4	700653	C03137	HMDB13713	0.001809	0.000779	0.0203605	-0.1443	0.01078	4.35557e-38	0.001374	0.000968	0.156315	0.003255	0.001314	0.0137359	-0.00173	0.001482	0.242464
33961	0.186325	0.120208	0.1143	0.149502	1-stearoyl-GPC (18:0)	Lipid	Lysophospholipid	19420-57-6	497299		HMDB10384	0.000171	0.000334	0.610152	0.02675	0.004693	1.50638e-08	0.000989	0.000414	0.0172534	-0.00153	0.000553	0.00596076	0.002631	0.000636	3.72385e-05
33963				0.204312	acetoacetate	Lipid	Ketone Bodies	578486	96	C00164	HMDB00060	0.004369	0.001967	0.0265368	-0.05302	0.02748	0.0539334	0.003748	0.002426	0.122787	0.00479	0.003391	0.158676	-0.00249	0.003821	0.515344
33967	0.275337	0.122223	0.1527	0.0878345	N-acetylisoleucine	Amino Acid	Leucine, Isoleucine and Valine Metabolism	3077-46-1	2802421		HMDB61684	0.002632	0.000638	3.98604e-05	-0.05385	0.008936	2.23504e-09	0.002828	0.000792	0.000378704	0.002468	0.001087	0.0237569	0.000647	0.001257	0.60688
33968	0.170025	0.128636	0.3388	0.135784	5-dodecenoate (12:1n7)	Lipid	Medium Chain Fatty Acid	2430-94-6	5312378		HMDB00529	0.002254	0.000938	0.0163742	0.2009	0.01319	5.7647e-48	0.002844	0.001185	0.0166847	0.001179	0.001516	0.437035	0.001332	0.001818	0.463859
33969	0.511035	0.116211	0.000428	0.398054	stearidonate (18:4n3)	Lipid	Polyunsaturated Fatty Acid (n3 and n6)	111174-40-4	5312508	C16300	HMDB06547	0.003948	0.001104	0.000365792	0.1774	0.01543	4.85312e-29	0.005827	0.001344	1.6321e-05	0.000376	0.001922	0.844796	0.004686	0.00212	0.0272158
33971	0.279711	0.124234	0.1422	0.167547	10-heptadecenoate (17:1n7)	Lipid	Long Chain Fatty Acid	29743-97-3	5312435		HMDB60038	0.003546	0.000865	4.44112e-05	0.1415	0.01214	8.66031e-30	0.004058	0.001036	9.71058e-05	0.002846	0.001559	0.0686647	0.001282	0.001692	0.448641
33972	0.22127	0.120922	0.3377	0.147243	10-nonadecenoate (19:1n9)	Lipid	Long Chain Fatty Acid	73033-09-7	5312513		HMDB13622	0.003246	0.000815	7.32203e-05	0.08385	0.01145	4.45699e-13	0.003956	0.000991	7.17545e-05	0.002021	0.001426	0.157461	0.00246	0.001602	0.124989
33973	0.350554	0.11106	0.001582	0.36008	epiandrosterone sulfate	Lipid	Androgenic Steroids	22229-22-7	9929317			-0.01382	0.001791	2.51061e-14	-0.3098	0.0252	8.32367e-33	-0.01651	0.002373	7.15517e-12	-0.00824	0.002398	0.000653622	-0.00697	0.002922	0.0171514
33983	0.386856	0.120349	0.001029	0.364085	tauro-beta-muricholate	Lipid	Primary Bile Acid Metabolism	25696-60-0	168408		HMDB00932	0.005924	0.002017	0.00337895	0.1565	0.02821	3.57308e-08	0.00543	0.002607	0.0376172	0.007849	0.003069	0.0109662	-0.00426	0.003854	0.26931
34035	0.169478	0.11915	0.2609	0.192482	linolenate [alpha or gamma; (18:3n3 or 6)]	Lipid	Polyunsaturated Fatty Acid (n3 and n6)		5280934	C06426	HMDB03073	0.003402	0.000868	9.48464e-05	0.1292	0.01218	3.66765e-25	0.003757	0.001057	0.00040272	0.003196	0.001541	0.0388081	-0.00022	0.001707	0.899564
34214	0.249425	0.128902	0.5	0.0104875	1-arachidonoyl-GPI (20:4)*	Lipid	Lysophospholipid				HMDB61690	-0.00053	0.00059	0.370341	0.05046	0.0083	1.64521e-09	-0.00029	0.000718	0.685786	-0.00115	0.001063	0.280412	-0.0001	0.001167	0.928726
34384	0.282922	0.115917	0.01544	0.251638	stachydrine	Xenobiotics	Food Component/Plant	4136-37-2	115244	C10172	HMDB04827	0.01265	0.002424	2.16264e-07	-0.05529	0.03379	0.102117	0.01488	0.002871	2.84906e-07	0.008417	0.004536	0.0643311	0.004827	0.004707	0.305327
34389	0.288625	0.104482	0.0006557	0.283247	1-methylxanthine	Xenobiotics	Xanthine Metabolism	6136-37-4	80220	C16358	HMDB10738	-0.00375	0.002543	0.140935	-0.06967	0.03563	0.0507537	-0.00637	0.003065	0.0380372	0.00174	0.00461	0.705987	-0.00754	0.004778	0.114905
34390	0.220237	0.103331	0.03525	0.165883	7-methylxanthine	Xenobiotics	Xanthine Metabolism	552-62-5	68374	C16353	HMDB01991	0.001067	0.002026	0.598586	0.01223	0.02833	0.666048	0.001715	0.00246	0.485904	-0.00024	0.003619	0.948241	0.003068	0.00397	0.439831
34395	0.381498	0.115824	0.0003165	0.329845	1-methylurate	Xenobiotics	Xanthine Metabolism	708-79-2	69726	C16359	HMDB03099	-0.00139	0.002343	0.552682	-0.09736	0.03273	0.00299441	-0.002	0.002792	0.474534	-0.00108	0.00435	0.803766	-0.0024	0.004403	0.586104
34396	0.288568	0.110044	0.04868	0.172655	choline phosphate	Lipid	Phospholipid Metabolism	72556-74-2	1014	C00588	HMDB01565	-0.00231	0.000731	0.00160065	0.03531	0.01019	0.000548727	-0.00119	0.000854	0.162762	-0.00422	0.001385	0.00251776	0.003917	0.001412	0.00560321
34397	0.293266	0.121299	0.2777	0.177907	1-arachidonylglycerol (20:4)	Lipid	Monoacylglycerol	35474-99-8	5282281	C13857	HMDB11549	0.002873	0.001431	0.0448442	0.2047	0.02017	2.95478e-23	0.005512	0.001759	0.00179738	-0.00206	0.002467	0.405088	0.006287	0.002814	0.0256229
34399	0.402437	0.107369	0.1446	0.123176	3,7-dimethylurate	Xenobiotics	Xanthine Metabolism	13087-49-5	83126	C16360	HMDB01982	0.001096	0.001952	0.574693	0.02307	0.0273	0.398281	0.00079	0.002358	0.737752	0.001481	0.003442	0.667244	-0.00035	0.003831	0.926282
34400	0.460328	0.098293	0.003093	0.263598	1,7-dimethylurate	Xenobiotics	Xanthine Metabolism	33868-03-0	91611	C16356	HMDB11103	-0.00083	0.002303	0.718975	-0.0203	0.03238	0.530683	-0.00208	0.002765	0.452503	0.001597	0.004213	0.704831	-0.00518	0.00433	0.23143
34401	0.464533	0.11162	9.428e-05	0.410692	5-acetylamino-6-formylamino-3-methyluracil	Xenobiotics	Xanthine Metabolism	85438-96-6	108214	C16365	HMDB11105	-0.00564	0.002915	0.053393	-0.08953	0.04052	0.0273145	-0.00725	0.003556	0.0419168	-0.0024	0.005092	0.637119	-0.00656	0.005373	0.222452
34404	0.366104	0.114426	0.0333	0.180893	1,3,7-trimethylurate	Xenobiotics	Xanthine Metabolism	5415-44-1	79437	C16361	HMDB02123	-0.00044	0.002514	0.86259	-0.04519	0.0353	0.200682	-0.00111	0.003038	0.713963	0.001934	0.004565	0.672065	-0.00482	0.004778	0.313576
34407	0.092499	0.116805	0.357	0.0887798	isovalerylcarnitine (C5)	Amino Acid	Leucine, Isoleucine and Valine Metabolism	31023-24-2	6426851		HMDB00688	0.00048	0.000695	0.489969	-0.1189	0.009742	2.52333e-32	0.000762	0.000886	0.390026	-0.00047	0.001102	0.667625	0.001338	0.001345	0.319771
34409	0.377068	0.130159	0.01893	0.201771	stearoylcarnitine (C18)	Lipid	Fatty Acid Metabolism(Acyl Carnitine)	18822-91-8	6426855		HMDB00848	0.002591	0.000534	1.43313e-06	-0.0558	0.007532	2.45674e-13	0.003639	0.000664	5.86031e-08	0.000695	0.000905	0.442977	0.003606	0.00102	0.000419106
34419				0.241287	1-linoleoyl-GPC (18:2)	Lipid	Lysophospholipid		11988421	C04100	HMDB10386	-3e-05	0.000428	0.946186	-0.00135	0.005996	0.822205	0.000288	0.000538	0.592173	-0.00092	0.000676	0.174164	0.001388	0.000805	0.0850731
34424	0.259902	0.106205	0.003097	0.283756	5-acetylamino-6-amino-3-methyluracil	Xenobiotics	Xanthine Metabolism	1196153-01-1	88299	C16366	HMDB04400	-0.00257	0.002546	0.313641	0.007631	0.03568	0.830675	-0.00341	0.003039	0.261965	-0.00155	0.004654	0.739316	-0.00465	0.004716	0.323876
34445	0.742246	0.066872	3.188e-07	0.552776	sphingosine 1-phosphate	Lipid	Sphingolipid Metabolism	26993-30-6	5283560	C06124	HMDB00277	-0.00165	0.000486	0.000689719	0.004729	0.006584	0.472767	-0.00151	0.0006	0.0122811	-0.00206	0.000864	0.0178027	0.001002	0.0009	0.265667
34457	0.254496	0.111942	0.04583	0.153157	gamma-glutamylisoleucine*	Peptide	Gamma-glutamyl Amino Acid		14253342		HMDB11170	0.003107	0.000618	5.95029e-07	-0.09762	0.008621	3.20078e-28	0.003378	0.000771	1.35709e-05	0.003126	0.001012	0.002176	0.000702	0.001213	0.563198
34534	0.607487	0.116598	0.3704	0.25718	laurylcarnitine (C12)	Lipid	Fatty Acid Metabolism(Acyl Carnitine)	25518-54-1	10427569		HMDB02250	0.005218	0.000877	3.55677e-09	0.01182	0.01215	0.330773	0.006757	0.001069	4.42405e-10	0.002147	0.001499	0.152753	0.004461	0.001653	0.00703305
35101	0.088507	0.111406	0.5	0.0172778	beta-guanidinopropanoate	Xenobiotics	Food Component/Plant	353-09-3	67701	C03065	HMDB13222	0.000424	0.002598	0.870512	-0.1244	0.03626	0.000625236	3.1e-05	0.003107	0.992063	-0.00046	0.00476	0.922927	0.002236	0.005074	0.65951
35107	0.270831	0.112839	0.0276	0.262119	isovalerylglycine	Amino Acid	Leucine, Isoleucine and Valine Metabolism	16284-60-9	546304		HMDB00678	0.002153	0.001779	0.226448	0.07834	0.02486	0.00166638	0.002566	0.002184	0.240318	0.001948	0.003057	0.524366	-0.00083	0.003449	0.809046
35114	0.395417	0.13176	0.005981	0.325536	7-methylguanine	Nucleotide	Purine Metabolism, Guanine containing	578-76-7	11361	C02242	HMDB00897	0.001315	0.000327	6.04207e-05	-0.03231	0.00453	1.72555e-12	0.001214	0.000412	0.00328981	0.001434	0.000529	0.00698346	-0.00011	0.000607	0.856067
35126	0.355293	0.120038	0.06037	0.1686	phenylacetylglutamine	Peptide	Acetylated Peptides	28047-15-6	92258	C04148	HMDB06344	0.006936	0.001029	2.57397e-11	0.05955	0.01438	3.73143e-05	0.005961	0.001243	1.93668e-06	0.009371	0.001867	8.3854e-07	-0.00292	0.001975	0.139557
35127	0.407203	0.117736	0.07428	0.268248	pro-hydroxy-pro	Amino Acid	Urea cycle; Arginine and Proline Metabolism	18684-24-7	11673055		HMDB06695	0.001392	0.000666	0.0368162	0.05322	0.009234	1.06191e-08	0.00144	0.000814	0.077078	0.00158	0.001183	0.182652	-0.00015	0.001256	0.903049
35130	0.495805	0.113461	0.08737	0.212517	N4-acetylcytidine	Nucleotide	Pyrimidine Metabolism, Cytidine containing	3768-18-1	107461		HMDB05923	0.003339	0.001217	0.00615005	-0.01292	0.01697	0.446786	0.003948	0.00148	0.0077978	0.001902	0.002127	0.371895	0.002141	0.002283	0.348454
35132	0.648488	0.126653	0.0009966	0.320622	3-methylcytidine	Nucleotide	Pyrimidine Metabolism, Cytidine containing	21028-20-6	159649			-7.17e-06	0.000684	0.991633	-0.0853	0.009391	4.58733e-19	0.000779	0.000865	0.368032	-0.00195	0.001099	0.0770125	0.002461	0.001304	0.0593542
35136	0.30752	0.108879	0.004957	0.230755	5-methyluridine (ribothymidine)	Nucleotide	Pyrimidine Metabolism, Uracil containing	1463-10-1	445408		HMDB00884	-0.00013	0.0004	0.745045	-0.03287	0.005619	6.41705e-09	0.000583	0.000487	0.231545	-0.00125	0.000697	0.0728506	0.001739	0.000788	0.0275069
35137	0.900143	0.069201	0.0008152	0.515064	N2,N2-dimethylguanosine	Nucleotide	Purine Metabolism, Guanine containing	2140-67-2	92919		HMDB04824	0.003391	0.000401	7.87413e-17	-0.0129	0.005557	0.0204624	0.003805	0.000504	1.09327e-13	0.002546	0.000653	0.000114185	0.000722	0.000712	0.310766
35157	0.46176	0.108184	0.00529	0.212911	N6-carbamoylthreonyladenosine	Nucleotide	Purine Metabolism, Adenine containing	24719-82-2	161466		HMDB41623	0.002699	0.000474	1.55736e-08	-0.03442	0.006632	2.48298e-07	0.002811	0.000596	2.8402e-06	0.002739	0.000776	0.000473749	0.000475	0.000924	0.607559
35159	0.603531	0.112775	0.0001623	0.431447	cysteine-glutathione disulfide	Amino Acid	Glutathione Metabolism	13081-14-6	4247235		HMDB00656	0.001539	0.001367	0.260196	0.06617	0.01912	0.000559559	0.002142	0.001644	0.192867	-0.00111	0.002463	0.652649	0.002217	0.002585	0.391153
35160	0.223421	0.127975	0.09566	0.174587	oleoylcarnitine (C18:1)	Lipid	Fatty Acid Metabolism(Acyl Carnitine)	38677-66-6	6441392		HMDB05065	0.003205	0.000495	1.43329e-10	-0.009	0.006948	0.195476	0.003855	0.000594	1.55097e-10	0.001743	0.000896	0.0524967	0.001926	0.000953	0.043544
35172	0.341765	0.130276	0.313	0.107844	orotidine	Nucleotide	Pyrimidine Metabolism, Orotate containing	314-50-1	92751		HMDB00788	0.005351	0.000991	8.14914e-08	-0.07154	0.01377	2.38102e-07	0.004097	0.001084	0.00016841	0.008222	0.002036	6.49092e-05	-0.00308	0.001666	0.0647874
35186	0.578892	0.121432	0.04453	0.261503	1-arachidonoyl-GPE (20:4n6)*	Lipid	Lysophospholipid		42607465		HMDB11517	-0.00035	0.000466	0.446466	0.01054	0.006535	0.106906	0.00021	0.00057	0.713325	-0.00162	0.000825	0.0502656	0.002093	0.000881	0.0175983
35253	0.047019	0.124005	0.5	0	2-palmitoyl-GPC (16:0)*	Lipid	Lysophospholipid		15061532		HMDB61702	-0.00068	0.00043	0.116609	-0.00894	0.006059	0.140188	-0.00026	0.000517	0.617179	-0.00128	0.000791	0.107756	0.001047	0.000855	0.221236
35305	0.377193	0.126033	0.5	0.0366068	1-palmitoyl-GPI (16:0)	Lipid	Lysophospholipid				HMDB61695	-0.00169	0.001278	0.186596	0.1211	0.01802	2.89135e-11	-0.00085	0.001505	0.571174	-0.00371	0.00246	0.132035	0.001852	0.002536	0.465326
35320	0.44874	0.111265	4.198e-06	0.422288	catechol sulfate	Xenobiotics	Benzoate Metabolism	4918-96-1	3083879		HMDB59724	0.001512	0.001142	0.185754	-0.01461	0.0158	0.355353	0.001252	0.001413	0.376146	0.002392	0.001936	0.217403	-0.00048	0.002167	0.823801
35322	0.321095	0.117027	0.004824	0.274313	hydroquinone sulfate	Xenobiotics	Drug - Topical Agents	123-31-9	161220	C00530	HMDB02434	0.000739	0.001871	0.692861	-0.02823	0.026	0.277822	0.003026	0.002273	0.183584	-0.00456	0.00326	0.162869	0.00614	0.003635	0.0914437
35436	0.524854	0.116137	0.1594	0.159554	hexanoylglycine	Lipid	Fatty Acid Metabolism(Acyl Glycine)	24003-67-6	99463		HMDB00701	0.008714	0.00191	5.6063e-06	0.2448	0.0267	2.05742e-19	0.009989	0.002436	4.55379e-05	0.006856	0.003001	0.0229246	0.001998	0.003679	0.587105
35527	0.284475	0.118591	0.05442	0.207669	4-hydroxyhippurate	Xenobiotics	Benzoate Metabolism	2482-25-9	151012		HMDB13678	0.003928	0.001164	0.000763357	0.091	0.0163	2.94168e-08	0.004421	0.001387	0.00149941	0.003185	0.002172	0.14331	0.000172	0.002283	0.940003
35628	0.543239	0.131863	0.0002752	0.430378	1-oleoyl-GPE (18:1)	Lipid	Lysophospholipid	89576-29-4	9547071		HMDB11506	-0.00129	0.000657	0.0492483	-0.03262	0.00908	0.000341787	-0.00083	0.000826	0.312887	-0.00211	0.001061	0.0473226	0.001427	0.001258	0.256537
35631	0.520702	0.12162	0.0003112	0.555362	1-palmitoyl-GPE (16:0)	Lipid	Lysophospholipid	53862-35-4	9547069		HMDB11503	0.001688	0.000542	0.00190538	0.03975	0.0075	1.38286e-07	0.001924	0.000666	0.00399074	0.001018	0.000937	0.277854	0.001341	0.001021	0.18913
35635	0.511368	0.126398	0.0002654	0.431319	3-(3-hydroxyphenyl)propionate	Xenobiotics	Benzoate Metabolism	621-54-5	91	C11457	HMDB00375	-0.00119	0.002823	0.673708	0.02407	0.03898	0.536985	-0.00109	0.003456	0.751724	-0.001	0.004925	0.839048	0.000867	0.005463	0.873978
35637	0.336614	0.12855	0.01041	0.28841	cysteinylglycine	Amino Acid	Glutathione Metabolism	19246-18-5	439498	C01419	HMDB00078	-0.00358	0.001062	0.000767542	-0.05727	0.01477	0.00011109	-0.00196	0.001339	0.142898	-0.00656	0.001737	0.000184394	0.005111	0.002022	0.0115851
35651	0.355724	0.123983	0.06544	0.213277	ectoine	Xenobiotics	Chemical	96702-03-3	126041	C06231		0.001205	0.001683	0.474373	-0.0909	0.0235	0.000116209	0.002907	0.002108	0.168377	-0.00207	0.002772	0.456076	0.005431	0.003336	0.103754
35669	0.360142	0.121153	0.000899	0.326921	tetradecanedioate (C14-DC)	Lipid	Fatty Acid, Dicarboxylate	821-38-5	13185		HMDB00872	0.003542	0.001041	0.000689719	-0.00103	0.01447	0.943362	0.003387	0.001238	0.00638462	0.00343	0.001922	0.0751526	-0.00043	0.001984	0.827872
35675	0.160166	0.125334	0.2247	0.165129	2-hydroxypalmitate	Lipid	Fatty Acid, Monohydroxy	764-67-0	92836		HMDB31057	0.001472	0.000381	0.000116743	0.02271	0.005296	1.94204e-05	0.001465	0.000467	0.00177431	0.001394	0.000655	0.034133	-0.00058	0.000748	0.4361
35678	0.311338	0.123841	0.03723	0.242142	hexadecanedioate (C16-DC)	Lipid	Fatty Acid, Dicarboxylate	505-54-4	10459	C19615	HMDB00672	0.004216	0.000909	3.93747e-06	-0.00122	0.01266	0.923013	0.004462	0.0011	5.43558e-05	0.003468	0.00161	0.0318995	0.000495	0.001736	0.775725
35718	0.152637	0.117437	0.2441	0.108344	dihomo-linolenate (20:3n3 or n6)	Lipid	Polyunsaturated Fatty Acid (n3 and n6)	17046-59-2	5280581	C03242	HMDB02925	0.000693	0.000599	0.24769	0.06144	0.008446	6.36956e-13	0.001673	0.000732	0.0224724	-0.00131	0.001054	0.214378	0.002585	0.001174	0.0277568
36095	0.262216	0.122932	0.09086	0.2389	thymol sulfate	Xenobiotics	Food Component/Plant	89-83-8		C09908	HMDB01878	-0.00535	0.003045	0.0794016	-0.2276	0.04253	1.04221e-07	-0.00158	0.003681	0.668566	-0.01361	0.005463	0.013208	0.01139	0.005959	0.0561777
36098	0.39607	0.116877	0.0003208	0.458466	4-vinylphenol sulfate	Xenobiotics	Benzoate Metabolism	2628-17-3	6426766	C05627	HMDB04072	-0.00502	0.001705	0.00327766	-0.1302	0.02357	4.06702e-08	-0.00649	0.002118	0.00227158	-0.00248	0.002869	0.387686	-0.0039	0.003304	0.238541
36099	0.341091	0.131026	0.02244	0.284843	4-ethylphenylsulfate	Xenobiotics	Benzoate Metabolism	123-07-9		C13637		-0.00149	0.002075	0.471806	-0.01644	0.02875	0.567569	-0.003	0.002603	0.249591	0.003003	0.003313	0.365394	-0.0074	0.004033	0.066695
36103	0.320729	0.122127	0.08035	0.213631	p-cresol sulfate	Xenobiotics	Benzoate Metabolism	3233-57-7	4615423		HMDB11635	0.004631	0.001365	0.000719062	0.06796	0.01915	0.000404011	0.002784	0.001708	0.103535	0.009311	0.00225	4.32838e-05	-0.00609	0.00263	0.0208394
36594	0.409919	0.119745	0.5	0.0437317	1-linoleoyl-GPI (18:2)*	Lipid	Lysophospholipid					-0.00098	0.000685	0.152261	0.05162	0.009608	9.37997e-08	-0.00064	0.000826	0.435203	-0.00209	0.00124	0.0924627	-1e-05	0.001343	0.991174
36600	0.264366	0.12728	0.06864	0.181749	1-linoleoyl-GPE (18:2)*	Lipid	Lysophospholipid		52925130		HMDB11507	-0.00069	0.000576	0.232612	-0.02226	0.00805	0.00577134	-0.00023	0.000711	0.748622	-0.00186	0.000986	0.0604148	0.001806	0.00111	0.104045
36602	0.360255	0.123419	0.3314	0.0366386	1-oleoyl-GPI (18:1)*	Lipid	Lysophospholipid					-0.00296	0.001117	0.00817282	0.04341	0.01576	0.00595848	-0.00241	0.001355	0.0755433	-0.0041	0.002019	0.0429834	0.000317	0.002219	0.8866
36738	0.644414	0.113614	1.742e-07	0.495147	gamma-glutamylglutamate	Peptide	Gamma-glutamyl Amino Acid	1116-22-9	92865	C05282	HMDB11737	0.004542	0.000776	6.23239e-09	-0.08412	0.01075	1.12293e-14	0.00545	0.001003	7.33851e-08	0.002383	0.00115	0.0390468	0.003025	0.001488	0.0422975
36746	0.581044	0.118971	0.5	0.118202	2-hydroxy-3-methylvalerate	Amino Acid	Leucine, Isoleucine and Valine Metabolism	488-15-3	164623		HMDB00317	-0.00067	0.000745	0.369757	-0.1449	0.01036	4.29701e-41	0.000384	0.00091	0.673396	-0.00238	0.001294	0.0667286	0.003077	0.001391	0.027133
36747	0.538005	0.116835	1.38e-06	0.536258	deoxycarnitine	Lipid	Carnitine Metabolism	6249-56-5	134	C01181	HMDB01161	0.000782	0.000355	0.0276219	-0.0887	0.004903	9.75661e-65	0.001184	0.000441	0.00746921	0.000106	0.000598	0.858856	0.00112	0.000643	0.0814658
36751	0.59815	0.120562	6.506e-06	0.554237	N2-acetyllysine	Amino Acid	Lysine Metabolism	1946-82-3	92907	C12989	HMDB00446	0.00469	0.001986	0.018358	0.03758	0.0275	0.172086	0.006121	0.002427	0.0118586	0.001893	0.003429	0.581339	0.007017	0.003475	0.0435911
36752	0.223207	0.116467	0.05035	0.135506	N6-acetyllysine	Amino Acid	Lysine Metabolism	692-04-6	92832	C02727	HMDB00206	0.002142	0.000428	6.704e-07	-0.00202	0.006033	0.737983	0.002179	0.000527	3.87895e-05	0.002223	0.000746	0.00306318	-0.00022	0.000806	0.786553
36754	0.119071	0.102441	0.1941	0.137208	octadecanedioate (C18-DC)	Lipid	Fatty Acid, Dicarboxylate	871-70-5	70095		HMDB00782	0.005022	0.001313	0.000138454	-0.00684	0.01826	0.707899	0.003902	0.001519	0.010392	0.00728	0.00251	0.00395436	-0.00364	0.002563	0.155714
36776	0.311707	0.120628	0.008455	0.226252	7-alpha-hydroxy-3-oxo-4-cholestenoate (7-Hoca)	Lipid	Sterol	115538-85-7	3081085	C17337	HMDB12458	0.002036	0.000491	3.70493e-05	-0.02766	0.006879	6.1656e-05	0.00242	0.000582	3.63213e-05	0.001102	0.000907	0.225033	0.001499	0.000944	0.112361
36808	0.209956	0.121268	0.2426	0.0400887	dimethylarginine (SDMA + ADMA)	Amino Acid	Urea cycle; Arginine and Proline Metabolism	102783-24-4	123831	C03626	HMDB01539	0.001661	0.000379	1.29369e-05	-0.01117	0.005366	0.0375727	0.002066	0.000452	5.56643e-06	0.00098	0.000706	0.165513	0.001573	0.000732	0.031776
36845	0.406209	0.118669	0.5	0.0966883	o-cresol sulfate	Xenobiotics	Benzoate Metabolism		11615528			-0.00121	0.002041	0.553008	-0.1224	0.02875	2.23892e-05	-0.00143	0.002458	0.561524	-0.0004	0.003696	0.914333	0.002394	0.00399	0.548528
36850	0.624823	0.108735	3.723e-06	0.478635	taurolithocholate 3-sulfate	Lipid	Secondary Bile Acid Metabolism	64936-83-0	440071	C03642	HMDB02580	0.001981	0.001758	0.260125	0.06708	0.02431	0.00589204	-0.00058	0.002143	0.786717	0.007856	0.002989	0.00894106	-0.00841	0.003365	0.0125875
37058	0.68955	0.100675	0.001496	0.497587	succinylcarnitine (C4-DC)	Energy	TCA Cycle	256928-74-2	71464481		HMDB61717	0.002642	0.000512	2.94938e-07	-0.0479	0.00711	2.50908e-11	0.003349	0.000618	7.88961e-08	0.001189	0.000918	0.196166	0.002663	0.000934	0.00442087
37059	0.190677	0.122206	0.1866	0.130166	malonylcarnitine	Lipid	Fatty Acid Synthesis	853728-01-5	22833583		HMDB02095	0.004225	0.0013	0.0011931	-0.1557	0.01826	4.57063e-17	0.005083	0.0016	0.00155244	0.001856	0.002257	0.411593	0.001348	0.002549	0.596997
37063	0.497747	0.125606	9.261e-05	0.373099	gamma-glutamylalanine	Peptide	Gamma-glutamyl Amino Acid	5875-41-2	440103		HMDB29142	0.000524	0.000924	0.57072	-0.04999	0.01278	9.73567e-05	0.000705	0.001173	0.548272	-0.0004	0.001445	0.784554	0.001578	0.0018	0.380802
37076	0.541554	0.112273	8.933e-05	0.413683	N-acetylserine	Amino Acid	Glycine, Serine and Threonine Metabolism	97-14-3	65249		HMDB02931	0.002842	0.000372	4.33578e-14	-0.00215	0.005168	0.678145	0.003066	0.000469	1.07751e-10	0.002359	0.000595	8.89039e-05	0.000134	0.000684	0.845188
37097	0.587597	0.114661	8.195e-05	0.357754	tryptophan betaine	Amino Acid	Tryptophan Metabolism	20671-76-5	442106	C09213	HMDB61115	-0.00407	0.001928	0.0348453	-0.03476	0.02675	0.194019	-0.00787	0.002248	0.000491135	0.003494	0.003616	0.334504	-0.01164	0.0035	0.000901915
37112	0.567112	0.118719	0.008795	0.460822	chiro-inositol	Lipid	Inositol Metabolism	643-12-9		C19891	HMDB34220	0.006632	0.001876	0.000423387	-0.01781	0.02567	0.487803	0.007926	0.002273	0.000512755	0.005006	0.003426	0.1449	0.00356	0.003626	0.32629
37181	0.116791	0.117598	0.5	0.0250096	4-allylphenol sulfate	Xenobiotics	Food Component/Plant					0.003688	0.001663	0.0267549	-0.05051	0.02322	0.0298449	0.006215	0.002053	0.00256026	-0.00163	0.002775	0.557765	0.004239	0.003252	0.192539
37183	0.427296	0.117902	0.0001305	0.439434	5alpha-androstan-3alpha,17alpha-diol monosulfate	Lipid	Androgenic Steroids					-0.0068	0.001389	1.10183e-06	-0.2264	0.01937	5.66814e-30	-0.00792	0.001574	6.12835e-07	-0.00422	0.002764	0.127392	-0.00312	0.002531	0.218094
37184	0.44036	0.112379	1.441e-05	0.521477	5alpha-androstan-3alpha,17beta-diol disulfate	Lipid	Androgenic Steroids					-0.00829	0.002441	0.000710033	-1.191	0.03384	5.69996e-185	-0.01279	0.002584	9.0557e-07	0.000973	0.005268	0.853546	-0.01401	0.004586	0.00229448
37185	0.423408	0.124691	0.0003762	0.35449	5alpha-androstan-3alpha,17beta-diol monosulfate (2)	Lipid	Androgenic Steroids					-0.00032	0.001692	0.850214	-1.2394	0.02374	0	-9e-05	0.000936	0.921374	-0.00053	0.004917	0.91442	0.000773	0.002923	0.791365
37186	0.398509	0.113445	0.0001261	0.416056	5alpha-androstan-3alpha,17beta-diol monosulfate (1)	Lipid	Androgenic Steroids					-0.01848	0.002264	8.54289e-16	-0.3248	0.03163	9.24945e-24	-0.01962	0.002917	3.33321e-11	-0.01628	0.003408	2.57966e-06	-0.00675	0.004002	0.0920025
37187	0.355558	0.116837	0.001199	0.337314	5alpha-androstan-3beta,17alpha-diol disulfate	Lipid	Androgenic Steroids					-0.00192	0.002424	0.42829	-0.4755	0.03378	9.94014e-42	-0.00565	0.003011	0.060797	0.006664	0.00404	0.0999235	-0.0135	0.004564	0.00315523
37190	0.411474	0.112959	0.000157	0.371454	5alpha-androstan-3beta,17beta-diol disulfate	Lipid	Androgenic Steroids	571-20-0	242332	C12525	HMDB00493	-0.01274	0.001986	2.05593e-10	-0.584	0.0278	1.63521e-83	-0.01727	0.002581	4.15902e-11	-0.00379	0.002775	0.173228	-0.01287	0.003564	0.00031353
37192	0.392471	0.11539	0.0002501	0.361175	5alpha-androstan-3beta,17beta-diol monosulfate (2)	Lipid	Androgenic Steroids					-0.01863	0.002109	3.60499e-18	-0.4396	0.02943	2.36055e-46	-0.02115	0.002618	2.37875e-15	-0.01391	0.003516	9.07611e-05	-0.00683	0.003768	0.0699681
37196	0.349471	0.123909	0.07798	0.177986	5alpha-pregnan-3beta,20beta-diol monosulfate (1)	Lipid	Progestin Steroids					-0.01341	0.001754	4.61597e-14	-0.00463	0.02471	0.851337	-0.01703	0.002266	1.60104e-13	-0.00598	0.0026	0.0219735	-0.01243	0.003255	0.000139535
37198	0.298974	0.125509	0.2058	0.122135	5alpha-pregnan-3beta,20alpha-diol disulfate	Lipid	Progestin Steroids					-0.00987	0.001813	6.69831e-08	-0.07543	0.02567	0.00336497	-0.01481	0.002381	8.45467e-10	-8e-05	0.002537	0.976198	-0.01529	0.003461	1.07021e-05
37200	0.206743	0.121466	0.1849	0.101221	5alpha-pregnan-3beta,20alpha-diol monosulfate (2)	Lipid	Progestin Steroids					-0.01311	0.001859	3.10327e-12	-0.02234	0.02615	0.393066	-0.01841	0.002426	9.3973e-14	-0.0018	0.002591	0.488893	-0.01638	0.003406	1.64157e-06
37202	0.482687	0.111884	6.297e-06	0.584824	androstenediol (3beta,17beta) disulfate (1)	Lipid	Androgenic Steroids		87120982	C04295	HMDB03818	-0.01173	0.001523	2.77885e-14	-0.3103	0.02118	8.74484e-45	-0.01227	0.001951	5.32816e-10	-0.0115	0.002337	1.3115e-06	-0.00291	0.002641	0.270916
37203	0.212463	0.105929	0.0259	0.294524	androstenediol (3beta,17beta) disulfate (2)	Lipid	Androgenic Steroids		87120982	C04295	HMDB03818	-0.00898	0.001242	8.78501e-13	-0.2624	0.01744	6.52304e-47	-0.01045	0.001631	2.53002e-10	-0.00644	0.001719	0.000206569	-0.00492	0.002319	0.0339201
37207	0.530705	0.115106	1.862e-06	0.552478	androstenediol (3alpha, 17alpha) monosulfate (2)	Lipid	Androgenic Steroids					-0.01245	0.001442	1.8982e-17	-0.2773	0.02001	1.32537e-40	-0.01346	0.001851	8.22868e-13	-0.01037	0.00219	3.093e-06	-0.00233	0.002591	0.368004
37209	0.55865	0.105613	0.0004255	0.480164	androstenediol (3alpha, 17alpha) monosulfate (3)	Lipid	Androgenic Steroids					-0.01052	0.001373	3.66433e-14	-0.3822	0.01926	5.62608e-76	-0.01224	0.001784	1.38016e-11	-0.00783	0.001993	0.000101093	-0.00511	0.002209	0.020817
37210	0.494661	0.112324	0.00374	0.410125	androstenediol (3beta,17beta) monosulfate (2)	Lipid	Androgenic Steroids					-0.01549	0.001691	2.16513e-19	-0.04763	0.02354	0.0432102	-0.0166	0.002133	2.20734e-14	-0.01335	0.002705	1.21142e-06	-0.00599	0.003076	0.0515533
37211	0.510469	0.105956	1.113e-06	0.596041	androstenediol (3beta,17beta) monosulfate (1)	Lipid	Androgenic Steroids	521-17-5	13847309		HMDB03818	-0.01723	0.001531	5.28568e-28	-0.2766	0.02129	3.58057e-36	-0.01691	0.001967	4.14144e-17	-0.01899	0.002344	7.36e-15	0.001382	0.002641	0.600865
37253	0.154703	0.121742	0.192	0.11707	2-hydroxyglutarate	Lipid	Fatty Acid, Dicarboxylate	40951-21-1	43	C02630	HMDB00606	0.001312	0.000743	0.0780118	-0.00194	0.01048	0.853048	0.001178	0.000925	0.20319	0.001485	0.001242	0.232595	0.000417	0.001454	0.774308
37431	0.439351	0.114327	0.04924	0.247857	N-methylproline	Amino Acid	Urea cycle; Arginine and Proline Metabolism	475-11-6	557			0.008365	0.001839	5.98419e-06	-0.02356	0.02559	0.357473	0.01091	0.002174	6.46295e-07	0.00374	0.003466	0.281184	0.006639	0.003565	0.0628025
37432	0.513064	0.117892	0.5	0.139601	N-acetyl-beta-alanine	Nucleotide	Pyrimidine Metabolism, Uracil containing	3025-95-4	76406	C01073		0.000332	0.0006	0.579473	-0.06029	0.008366	1.07004e-12	0.000104	0.000746	0.889005	0.001217	0.001027	0.236874	-0.00023	0.001183	0.847706
37443	0.354562	0.124505	0.007439	0.307747	cysteine sulfinic acid	Amino Acid	Methionine, Cysteine, SAM and Taurine Metabolism	207121-48-0	109	C00606	HMDB00996	0.001498	0.001316	0.25526	0.0192	0.01839	0.296744	0.002438	0.001608	0.13	-0.00068	0.002307	0.766786	0.004646	0.002502	0.0634957
37445	0.239412	0.121937	0.05306	0.187932	4-hydroxycoumarin	Xenobiotics	Drug - Cardiovascular	1076-38-6	54682930	C20414		0.00599	0.001981	0.00255123	-0.07341	0.02751	0.00772992	0.00667	0.0024	0.00558741	0.006463	0.003533	0.0682364	0.001769	0.00386	0.646815
37455	0.101807	0.120386	0.3502	0.0839681	glycerophosphoethanolamine	Lipid	Phospholipid Metabolism	33049-08-0	123874	C01233	HMDB00114	0.001067	0.001276	0.40318	0.03551	0.01819	0.0510793	0.002765	0.001554	0.075557	-0.00331	0.00225	0.14255	0.00381	0.002368	0.107753
37459	0.719288	0.102973	0.0002671	0.42605	ergothioneine	Xenobiotics	Food Component/Plant	58511-63-0	3032311	C05570	HMDB03045	-0.00065	0.001069	0.546254	-0.06617	0.01502	1.14707e-05	-0.00022	0.001326	0.866701	-0.002	0.001794	0.265612	0.001044	0.001778	0.557032
37475	0.251658	0.119776	0.5	0.123171	4-acetaminophen sulfate	Xenobiotics	Drug - Analgesics, Anesthetics	10066-90-7;32113-41-0	83939	C06804	HMDB59911	0.003054	0.004571	0.504255	0.2585	0.06419	6.02309e-05	-0.00054	0.00583	0.92684	0.01258	0.007362	0.0883934	-0.01004	0.008991	0.264227
37478	0.520746	0.12684	0.000726	0.414024	docosapentaenoate (n6 DPA; 22:5n6)	Lipid	Polyunsaturated Fatty Acid (n3 and n6)	25182-74-5	6441454	C16513	HMDB01976	-0.00277	0.00125	0.0266943	0.02271	0.01728	0.188995	-0.0018	0.001601	0.262263	-0.00457	0.001908	0.0171226	0.003115	0.002356	0.18636
37496	0.652143	0.093782	0.01799	0.384835	N-acetylputrescine	Amino Acid	Polyamine Metabolism	18233-70-0	122356	C02714	HMDB02064	0.002403	0.00047	3.71604e-07	0.01	0.00656	0.127521	0.002309	0.000584	8.25692e-05	0.002689	0.000795	0.000797889	0.000171	0.00086	0.842881
37506				0.346814	palmitoyl sphingomyelin (d18:1/16:0)	Lipid	Sphingolipid Metabolism	6254-89-3	9939941			0.00094	0.000217	1.56556e-05	0.02672	0.003014	2.77385e-18	0.000983	0.000267	0.00024664	0.00077	0.000368	0.0371451	0.000567	0.000402	0.158133
37529	0.319175	0.123826	0.008572	0.305821	sphingomyelin (d18:1/18:1, d18:2/18:0)	Lipid	Sphingolipid Metabolism	108392-10-5	6443882		HMDB12101	0.001476	0.000374	8.4255e-05	0.08194	0.005258	6.974e-50	0.002012	0.000466	1.81169e-05	0.00041	0.000626	0.512193	0.001497	0.000701	0.0329614
37752	0.049294	0.126343	0.5	0	13-HODE + 9-HODE	Lipid	Fatty Acid, Monohydroxy		43013			0.001717	0.00093	0.0649643	0.1159	0.01324	6.80433e-18	0.002011	0.001067	0.0598863	0.00153	0.001858	0.410812	0.000795	0.001878	0.672084
38100	0.170348	0.122426	0.5	0.0373087	betonicine	Xenobiotics	Food Component/Plant	515-25-3	164642	C08269	HMDB29412	-0.00054	0.003582	0.879608	0.05856	0.05018	0.243483	-0.00322	0.004386	0.463412	0.006121	0.006374	0.337619	-0.00495	0.00714	0.488192
38102	0.456829	0.104302	0.5	0.182749	oleoyl ethanolamide	Lipid	Endocannabinoid	11-58-0;111-58-0	5283454		HMDB02088	0.00279	0.000716	0.000103691	0.08414	0.009971	9.16676e-17	0.003737	0.00083	7.77934e-06	0.000973	0.001387	0.483577	0.001648	0.001388	0.235225
38116	0.319076	0.122173	0.03263	0.201171	indole-3-carboxylic acid	Amino Acid	Tryptophan Metabolism	771-50-6	69867	C19837	HMDB03320	0.001447	0.001028	0.159603	-0.01984	0.01428	0.165091	0.002758	0.001248	0.0273194	-7e-05	0.00182	0.96911	0.001869	0.001975	0.344165
38125	0.121216	0.118834	0.5	0.0145406	4-cholesten-3-one	Lipid	Sterol	601-57-0	91477	C00599	HMDB00921	-0.00027	0.001366	0.842868	0.05621	0.01927	0.00361104	0.002407	0.001626	0.139236	-0.00493	0.002495	0.0489177	0.008488	0.002703	0.00172691
38127	0.333753	0.120874	0.04693	0.189459	S-methylmethionine	Amino Acid	Methionine, Cysteine, SAM and Taurine Metabolism	582174	458	C05319	HMDB38670	0.002925	0.002228	0.189602	0.001536	0.03128	0.960828	0.00705	0.002661	0.00823966	-0.00568	0.004047	0.161623	0.01052	0.004416	0.0173372
38165	0.217535	0.120203	0.06032	0.247311	palmitoyl ethanolamide	Lipid	Endocannabinoid	544-31-0	4671	C16512	HMDB02100	0.001709	0.000408	3.0688e-05	0.0434	0.005721	6.64956e-14	0.002481	0.000498	7.69938e-07	0.000306	0.00071	0.666688	0.002514	0.00078	0.00129275
38168	0.592844	0.113554	2.498e-07	0.600607	16a-hydroxy DHEA 3-sulfate	Lipid	Androgenic Steroids					-0.00753	0.001705	1.08354e-05	-0.1859	0.02377	1.13899e-14	-0.00803	0.002184	0.000249696	-0.00779	0.002624	0.00318421	-0.00131	0.00286	0.645807
38170	0.367165	0.111868	0.0003158	0.412016	pregnenolone sulfate	Lipid	Pregnenolone Steroids	1247-64-9	105074		HMDB00774	-0.01103	0.001651	3.57051e-11	-0.2792	0.02302	5.35504e-32	-0.01247	0.002085	3.34419e-09	-0.00792	0.002627	0.00273233	-0.00348	0.002938	0.236685
38178				0.480127	cis-4-decenoylcarnitine (C10:1)	Lipid	Fatty Acid Metabolism(Acyl Carnitine)	98930-66-6				0.004173	0.000863	1.50741e-06	0.04021	0.01187	0.000728925	0.004947	0.001084	5.81083e-06	0.00229	0.001396	0.101851	0.002411	0.001584	0.128312
38276	0.47341	0.115314	0.5	0.216268	2,3-dihydroxyisovalerate	Xenobiotics	Food Component/Plant	1756-18-9	677	C04039	HMDB12141	0.008363	0.002019	3.70038e-05	-0.1409	0.02804	5.88562e-07	0.007677	0.002504	0.0022501	0.01007	0.003423	0.00347677	-0.0008	0.003904	0.837974
38296	0.115367	0.124313	0.5	0.0147603	17-methylstearate (i19:0)	Lipid	Fatty Acid, Branched	2724-59-6	3083779		HMDB37397	0.002158	0.000605	0.000382634	0.03177	0.008526	0.000203667	0.002744	0.000731	0.000189617	0.001345	0.001089	0.217691	0.001086	0.001189	0.361572
38395	0.218996	0.125432	0.5	0.122581	12,13-DiHOME	Lipid	Fatty Acid, Dihydroxy	263399-35-5	10236635	C14829	HMDB04705	0.001035	0.001457	0.477847	0.09914	0.02038	1.30163e-06	-0.00017	0.001794	0.924389	0.003265	0.002479	0.18872	-0.00366	0.002881	0.204731
38399	0.354865	0.124136	0.1788	0.242867	9,10-DiHOME	Lipid	Fatty Acid, Dihydroxy	263399-34-4	9966640	C14828	HMDB04704	0.000688	0.001441	0.633334	0.04817	0.02023	0.0174442	-0.0013	0.001766	0.463247	0.004693	0.002417	0.0530049	-0.00587	0.002837	0.0385624
38625	0.205198	0.121859	0.08983	0.20566	stearoyl ethanolamide	Lipid	Endocannabinoid	111-57-9	27902		HMDB13078	0.003259	0.000576	1.94203e-08	0.09092	0.008097	7.15801e-28	0.00438	0.000699	6.24125e-10	0.00126	0.001007	0.211992	0.003544	0.001118	0.00156122
38637	0.441032	0.117471	0.008402	0.351354	cinnamoylglycine	Xenobiotics	Food Component/Plant	16534-24-0	709625		HMDB11621	0.009257	0.002862	0.00125189	0.2044	0.03988	3.50635e-07	0.007899	0.003489	0.023845	0.01316	0.005066	0.00976078	-0.00575	0.00543	0.289724
38768	0.002184	0.119266	0.5	0	15-methylpalmitate (i17:0)	Lipid	Fatty Acid, Branched		17903417			0.000625	0.00142	0.659983	0.06267	0.01962	0.00144364	0.002426	0.001714	0.157298	-0.00256	0.002503	0.307897	0.004657	0.002722	0.0873738
39270	0.334602	0.124213	0.3849	0.154721	1-(1-enyl-palmitoyl)-GPE (P-16:0)*	Lipid	Lysoplasmalogen					0.000401	0.00058	0.488861	0.007259	0.008058	0.367864	0.000897	0.000686	0.191661	-0.00044	0.001076	0.683698	0.001706	0.001131	0.131514
39271	0.143048	0.126883	0.5	0	1-(1-enyl-stearoyl)-GPE (P-18:0)*	Lipid	Lysoplasmalogen					0.000188	0.000805	0.815057	0.02642	0.01132	0.0197519	0.000765	0.000973	0.4319	-0.00058	0.001458	0.689553	0.001726	0.001607	0.283143
39346	0.110676	0.129838	0.5	0.141894	alpha-CEHC glucuronide*	Cofactors and Vitamins	Tocopherol Metabolism	477200-36-5				0.01554	0.002261	1.13124e-11	0.02612	0.03189	0.412863	0.01594	0.002713	6.51267e-09	0.01588	0.004049	0.000105073	0.001665	0.004281	0.697468
39378	0.379447	0.126079	0.5	0.0532216	tauroursodeoxycholate	Lipid	Secondary Bile Acid Metabolism	14605-22-2	9848818		HMDB00874	0.004924	0.001551	0.00153275	0.06328	0.02212	0.00430406	0.005142	0.001957	0.00875322	0.004964	0.002585	0.055687	-0.00032	0.003082	0.918589
39379	0.028317	0.120189	0.5	0	glycoursodeoxycholate	Lipid	Secondary Bile Acid Metabolism	64480-66-6	12310288		HMDB00708	0.001693	0.002023	0.402915	0.02215	0.02891	0.443813	0.002985	0.002489	0.230799	-0.00127	0.003545	0.719534	0.002185	0.003949	0.580093
39592	0.281218	0.125726	0.2884	0.0546549	S-methylcysteine	Amino Acid	Methionine, Cysteine, SAM and Taurine Metabolism	1187-84-4	24417		HMDB02108	0.002073	0.000744	0.0054478	0.01584	0.01035	0.126417	0.002551	0.000917	0.0055357	0.001066	0.001283	0.406461	0.000809	0.001464	0.580924
39598	0.123129	0.117634	0.3619	0.0574205	7-methylurate	Xenobiotics	Xanthine Metabolism	612-37-3	69160	C16355	HMDB11107	0.008268	0.001664	7.9691e-07	0.1174	0.02356	7.16241e-07	0.01071	0.001991	1.01337e-07	0.002713	0.003072	0.377794	0.007765	0.003266	0.0175518
396	0.180527	0.124639	0.3126	0.132	glutarate (C5-DC)	Lipid	Fatty Acid, Dicarboxylate	110-94-1	743	C00489	HMDB00661	0.001821	0.00141	0.196712	-0.07116	0.0197	0.000315851	0.002914	0.001709	0.0884391	0.000261	0.002408	0.913666	0.00234	0.002729	0.391234
39600	0.448603	0.126293	0.0003345	0.37117	3-hydroxyhippurate	Xenobiotics	Benzoate Metabolism	1637-75-8	450268		HMDB06116	0.004455	0.001983	0.0249013	-0.01205	0.02742	0.660472	0.005017	0.002427	0.0390834	0.00354	0.003469	0.308128	0.003513	0.003833	0.359611
39603	0.466269	0.125454	0.05856	0.284086	ethyl glucuronide	Xenobiotics	Chemical	17685-04-0	152226		HMDB10325	0.001577	0.002761	0.567942	-0.05882	0.03829	0.124776	0.000974	0.003308	0.768425	0.0019	0.004953	0.701473	-0.00057	0.005096	0.910261
39609	0.103893	0.132848	0.5	0	16-hydroxypalmitate	Lipid	Fatty Acid, Monohydroxy	506-13-8	10466	C18218	HMDB06294	0.003168	0.000607	2.09916e-07	0.01376	0.008653	0.112029	0.003065	0.000731	3.12032e-05	0.003622	0.001157	0.00188473	-0.00073	0.001209	0.544974
39732	0.287198	0.128412	0.4705	0.103853	N-oleoyltaurine	Lipid	Endocannabinoid	52514-04-2	6437033			0.003279	0.001466	0.0254726	0.0731	0.02054	0.000386856	0.002976	0.001744	0.0884242	0.003577	0.002691	0.184516	-0.00129	0.002852	0.651096
39788	0.302897	0.12396	0.3526	0.302924	solanidine	Xenobiotics	Food Component/Plant	80-78-4	65727	C06543	HMDB03236	0.000749	0.002066	0.717157	-0.00875	0.02891	0.762204	-0.00128	0.002455	0.601251	0.003474	0.003801	0.361323	-0.00454	0.003869	0.240748
39831	0.13049	0.113774	0.3719	0.126172	eicosanodioate (C20-DC)	Lipid	Fatty Acid, Dicarboxylate	2424-92-2	75502			-0.00359	0.000761	2.81885e-06	-0.0762	0.01061	1.23559e-12	-0.00336	0.000951	0.00043146	-0.00438	0.001256	0.000560162	0.000321	0.001491	0.829278
39837	0.382749	0.122891	0.05903	0.354222	docosadioate (C22-DC)	Lipid	Fatty Acid, Dicarboxylate	505-56-6	244872	C19625		-0.00176	0.000786	0.025097	-0.05754	0.01086	1.40413e-07	-0.00125	0.000967	0.197189	-0.00331	0.001333	0.013484	0.001904	0.001528	0.213101
40007	0.541117	0.122336	0.03065	0.237214	carboxyethyl-GABA	Amino Acid	Glutamate Metabolism	908055	2572		HMDB02201	0.003182	0.000599	1.30318e-07	-0.00824	0.008363	0.324947	0.004429	0.000734	2.44731e-09	0.000293	0.001025	0.775328	0.002565	0.00117	0.0285228
40062	0.253897	0.121615	0.5	0	4-hydroxy-2-oxoglutaric acid	Lipid	Fatty Acid, Dicarboxylate	1187-99-1	599	C01127	HMDB02070	5.8e-05	0.002116	0.978032	0.008042	0.0305	0.792099	-0.00126	0.002571	0.623799	0.002224	0.003782	0.556888	0.00235	0.003671	0.5221
40097	0.248247	0.115362	0.02543	0.211595	X - 17299	Unknown						0.002489	0.000416	3.03693e-09	-0.09266	0.005825	8.78882e-52	0.002913	0.000523	3.46288e-08	0.001869	0.000674	0.0058107	0.001003	0.000781	0.1993
40173	0.463335	0.118014	0.0003332	0.392755	L-urobilin	Cofactors and Vitamins	Hemoglobin and Porphyrin Metabolism	34217-90-8	5280818	C05793	HMDB04159	0.01007	0.002337	1.78849e-05	-0.1395	0.03261	2.05662e-05	0.006372	0.002688	0.018032	0.01659	0.004539	0.000296706	-0.01122	0.004422	0.0112486
40406	0.341811	0.117809	0.003038	0.302514	trimethylamine N-oxide	Lipid	Phospholipid Metabolism	1184-78-7	1145	C01104	HMDB00925	0.006329	0.000972	1.16295e-10	0.02415	0.0135	0.0738856	0.006131	0.001203	4.37223e-07	0.006805	0.001645	4.40368e-05	-3e-05	0.001905	0.988574
40469	0.307362	0.113109	0.5	0.10329	N1-Methyl-2-pyridone-5-carboxamide	Cofactors and Vitamins	Nicotinate and Nicotinamide Metabolism	701-44-0	69698	C05842	HMDB04193	0.002057	0.000808	0.0110945	-0.01908	0.01146	0.0961879	0.00232	0.000955	0.0154015	0.002044	0.001549	0.187823	0.001126	0.001604	0.48307
40473	0.233796	0.117872	0.05139	0.203526	hydantoin-5-propionic acid	Amino Acid	Histidine Metabolism	5624-26-0	782	C05565	HMDB01212	0.003661	0.000985	0.000212539	-0.02003	0.01379	0.146669	0.0041	0.001202	0.000681163	0.002957	0.00172	0.086523	-0.00032	0.001871	0.862217
40479	0.331023	0.122184	0.006093	0.301602	2-oxindole-3-acetate	Xenobiotics	Food Component/Plant	2971-31-5	3080590		HMDB35514	0.005789	0.002137	0.00684094	0.04674	0.02959	0.114513	0.0075	0.002632	0.00448894	0.003606	0.003667	0.326154	0.003933	0.004119	0.33983
40481	0.234307	0.126061	0.05432	0.122987	dihydroferulic acid	Xenobiotics	Food Component/Plant	1135-23-5	14340			0.000938	0.001692	0.579389	-0.08383	0.0241	0.000523474	0.000865	0.001949	0.657418	0.000521	0.003418	0.878844	0.001436	0.003418	0.674439
40703	0.243621	0.120426	0.08529	0.245879	prolylglycine	Peptide	Dipeptide	2578-57-6	6426709		HMDB11178	0.003347	0.001258	0.00794204	-0.09043	0.01763	3.42704e-07	0.005301	0.001582	0.000844267	-0.00058	0.002041	0.775726	0.005127	0.00246	0.0373245
40708	0.352845	0.121199	0.1578	0.14476	pregnanediol-3-glucuronide	Lipid	Progestin Steroids	1852-49-9	123796		HMDB10318	-0.00928	0.001602	9.08996e-09	0.01448	0.02261	0.522126	-0.01337	0.002049	1.23199e-10	-0.00077	0.002406	0.749674	-0.01352	0.002951	4.94959e-06
40730	0.162312	0.118923	0.2721	0.10808	imidazole propionate	Amino Acid	Histidine Metabolism	1074-59-5	70630		HMDB02271	0.004125	0.001129	0.000270427	-0.1373	0.016	2.99685e-17	0.004382	0.001452	0.00263849	0.00339	0.001755	0.054167	0.001549	0.002197	0.480788
41220	0.537241	0.121276	0.2805	0.216103	2-stearoyl-GPE (18:0)*	Lipid	Lysophospholipid				HMDB11129	-0.00053	0.000585	0.360612	0.0474	0.008156	8.02346e-09	0.000284	0.000701	0.685004	-0.00195	0.001069	0.0687935	0.002595	0.001134	0.0222914
41494	0.361224	0.128747	0.01084	0.297934	alliin	Xenobiotics	Food Component/Plant	556-27-4	87310	C08265	HMDB33592	-0.00271	0.003012	0.369186	-0.05854	0.04156	0.159216	0.002701	0.00366	0.460758	-0.01295	0.005366	0.0162971	0.01401	0.005778	0.0154289
41754	0.621655	0.097584	0.0526	0.288389	heme	Cofactors and Vitamins	Hemoglobin and Porphyrin Metabolism	14875-96-8	26945	C00032	HMDB03178	0.001614	0.001882	0.391292	-0.08798	0.02597	0.000726494	0.003248	0.002297	0.157752	-0.00229	0.003324	0.491944	0.005022	0.003591	0.16212
41888	0.269641	0.119743	0.04686	0.214142	succinimide	Xenobiotics	Chemical	123-56-8	11439	C07273		0.000642	0.000651	0.324052	-0.1051	0.009117	3.06524e-29	0.00093	0.000796	0.243088	-0.00037	0.001133	0.743304	0.00074	0.001259	0.557143
42002	0.364209	0.128045	0.4816	0.278331	lanthionine	Xenobiotics	Chemical	468821	98504			0.006711	0.001631	4.18371e-05	-0.00056	0.02279	0.98035	0.007688	0.001967	0.0001011	0.00499	0.002938	0.0902895	0.000876	0.003144	0.780628
42087				0.304446	indoleacetylglutamine	Amino Acid	Tryptophan Metabolism		25200879		HMDB13240	0.004095	0.001773	0.021114	-0.1583	0.02476	2.35443e-10	0.007121	0.002153	0.000982822	-0.00091	0.003124	0.770447	0.008466	0.00331	0.0106366
42092	0.279535	0.124334	0.03155	0.216612	N-palmitoylglycine	Lipid	Fatty Acid Metabolism(Acyl Glycine)	2441-41-0	151008		HMDB13034	0.002295	0.000572	6.43677e-05	0.04819	0.007928	1.63927e-09	0.003047	0.00071	2.01115e-05	0.001314	0.000952	0.168319	0.001422	0.001106	0.198738
42109	0.535474	0.13102	0.3063	0.0734771	phosphate	Energy	Oxidative Phosphorylation	7664-38-2	1061	C00009	HMDB01429	5.1e-05	0.000381	0.894359	0.05111	0.005336	5.60399e-21	0.000546	0.000464	0.240043	-0.00076	0.000681	0.26398	0.000993	0.000759	0.190872
42370	0.388367	0.124431	0.00199	0.330422	S-1-pyrroline-5-carboxylate	Amino Acid	Glutamate Metabolism	2906-39-0	1196	C04322	HMDB01301	0.002005	0.000527	0.000149135	-0.0128	0.007296	0.0795937	0.00243	0.000633	0.000132796	0.001413	0.000953	0.138995	0.001005	0.001003	0.316475
42374	0.564662	0.109385	0.0003544	0.323894	2-aminobutyrate	Amino Acid	Glutathione Metabolism	1492-24-6	439691	C02261	HMDB00650	0.000648	0.000474	0.171799	-0.0189	0.006582	0.00416131	0.000604	0.000567	0.287004	0.000463	0.000862	0.591295	0.000235	0.000913	0.797195
42381				0.353351	gamma-CEHC glucuronide*	Cofactors and Vitamins	Tocopherol Metabolism					0.002967	0.001682	0.07805	0.06869	0.02352	0.00355906	0.005303	0.002007	0.00841565	-0.0027	0.003094	0.383122	0.006206	0.00322	0.0541244
42382	0.480886	0.111145	0.001224	0.431411	S-adenosylhomocysteine (SAH)	Amino Acid	Methionine, Cysteine, SAM and Taurine Metabolism	979-92-0	439155	C00021	HMDB00939	0.005682	0.001092	2.34302e-07	-0.08752	0.01514	9.47392e-09	0.007226	0.001357	1.30586e-07	0.002658	0.001826	0.146366	0.003475	0.002054	0.0908086
42398	0.562545	0.125199	0.0003944	0.509921	1-stearoyl-GPE (18:0)	Lipid	Lysophospholipid	69747-55-3	9547068		HMDB11130	0.0004	0.000528	0.449377	0.05583	0.007303	4.38718e-14	0.00119	0.00064	0.0633567	-0.00151	0.000935	0.107555	0.003377	0.000985	0.00062271
42420	0.484738	0.110471	0.0008172	0.309194	erythronate*	Carbohydrate	Aminosugar Metabolism	88759-55-1	2781043		HMDB00613	0.003301	0.000328	6.24593e-23	-0.00806	0.004574	0.0781607	0.003774	0.000407	1.82385e-19	0.002243	0.000539	3.91426e-05	0.001251	0.000614	0.0418289
42446	0.268803	0.113212	0.01032	0.335081	1-palmitoyl-2-linoleoyl-GPC (16:0/18:2)	Lipid	Phosphatidylcholine (PC)	40811-94-7	5287971		HMDB07973	-4e-05	0.000212	0.861953	0.01093	0.002948	0.000220001	0.000103	0.000255	0.68668	-0.00044	0.000383	0.248507	0.000535	0.000405	0.185982
42448	0.450493	0.115941	5.009e-05	0.518093	1-stearoyl-2-oleoyl-GPE (18:0/18:1)	Lipid	Phosphatidylethanolamine (PE)				HMDB08993	-0.00221	0.000887	0.0129357	0.01885	0.01224	0.123764	-0.00088	0.001049	0.40057	-0.00466	0.001647	0.00494122	0.004816	0.001643	0.00343262
42449	0.541318	0.11483	7.601e-06	0.580121	1-palmitoyl-2-linoleoyl-GPE (16:0/18:2)	Lipid	Phosphatidylethanolamine (PE)		9546747		HMDB05322	1.8e-05	0.000885	0.983873	0.04532	0.0122	0.000212071	0.000341	0.001074	0.750608	-0.00086	0.001578	0.587869	0.001377	0.001591	0.386826
42450	0.532324	0.123812	0.001595	0.309503	1-stearoyl-2-arachidonoyl-GPC (18:0/20:4)	Lipid	Phosphatidylcholine (PC)	35418-59-8	16219824		HMDB08048	-0.00062	0.000311	0.0460488	0.02981	0.004368	1.40633e-11	-3e-05	0.000378	0.928632	-0.00181	0.000551	0.00110158	0.001955	0.000565	0.000556296
42459	0.520372	0.120472	0.04646	0.356962	sphingomyelin (d18:2/16:0, d18:1/16:1)*	Lipid	Sphingolipid Metabolism					0.000894	0.000284	0.00167316	0.05497	0.004001	5.69624e-40	0.001026	0.000348	0.00328324	0.000593	0.000489	0.226296	0.000682	0.000531	0.199512
42463				0.375856	sphingomyelin (d18:1/14:0, d16:1/16:0)*	Lipid	Sphingolipid Metabolism		11433862		HMDB12097	0.001115	0.000347	0.00134074	0.04187	0.004804	9.55863e-18	0.001662	0.000414	6.65445e-05	9.3e-05	0.000617	0.879728	0.002282	0.000623	0.000257289
42489	0.245884	0.112371	0.01642	0.314848	2-hydroxydecanoate	Lipid	Fatty Acid, Monohydroxy	5393-81-7	21488			0.000743	0.000717	0.300553	-0.02537	0.01002	0.0115048	-7e-05	0.000877	0.933909	0.002624	0.001243	0.0355447	-0.00208	0.001402	0.137224
42574	0.421943	0.126767	0.1322	0.177483	glycohyocholate	Lipid	Secondary Bile Acid Metabolism					-0.00166	0.002166	0.44231	0.003789	0.03033	0.900602	-0.00191	0.002681	0.476322	-0.00061	0.003655	0.867889	-0.00137	0.004217	0.744769
42989	0.328585	0.126234	0.2367	0.147824	N-methyltaurine	Amino Acid	Methionine, Cysteine, SAM and Taurine Metabolism	107-68-6	7882			0.006466	0.002308	0.00516678	0.03547	0.03208	0.269012	0.009866	0.002856	0.000582819	-0.00018	0.003919	0.962655	0.008936	0.004508	0.0476634
43231	0.105933	0.12854	0.4914	0.0713595	6-oxopiperidine-2-carboxylate	Amino Acid	Lysine Metabolism	34622-39-4	3014237		HMDB61705	0.002813	0.001453	0.0532184	0.03489	0.02048	0.0887494	0.004751	0.001747	0.00669189	-0.00069	0.002692	0.797247	0.004969	0.002857	0.0822085
43239	0.259448	0.121675	0.03648	0.249295	S-allylcysteine	Xenobiotics	Food Component/Plant	21593-77-1	98280		HMDB34323	-0.00936	0.002612	0.000352579	-0.2098	0.03618	8.7271e-09	-0.00706	0.003242	0.0296904	-0.0121	0.004451	0.00691392	0.006864	0.00511	0.179425
43249	0.663868	0.111916	3.937e-07	0.532005	N-delta-acetylornithine	Amino Acid	Urea cycle; Arginine and Proline Metabolism		9920500			0.004328	0.000952	6.05747e-06	-0.01438	0.01317	0.275447	0.00521	0.001167	9.13449e-06	0.002069	0.001627	0.204322	0.00213	0.001694	0.208613
43255	0.586678	0.103797	4.918e-07	0.478466	N-acetyl-1-methylhistidine*	Amino Acid	Histidine Metabolism		193270			0.008748	0.001415	8.53806e-10	-0.04753	0.01961	0.0155251	0.01008	0.001736	9.02376e-09	0.007272	0.00244	0.00307005	0.002535	0.002579	0.325874
43256	0.314449	0.128655	0.2681	0.201337	N-acetyl-3-methylhistidine*	Amino Acid	Histidine Metabolism	37841-04-6	193270			0.007956	0.00215	0.000226462	-0.04343	0.03008	0.149039	0.01004	0.00259	0.000114015	0.004681	0.003915	0.232606	0.005389	0.004211	0.200872
43258	0.390979	0.118986	0.0006104	0.4065	acisoga	Amino Acid	Polyamine Metabolism	106692-36-8	129397			0.004421	0.001312	0.000777909	0.03211	0.01828	0.0793013	0.006344	0.001589	7.13815e-05	0.001088	0.002314	0.638554	0.004739	0.002469	0.0551712
43264	0.159849	0.114011	0.366	0.071129	3-hydroxybutyrylcarnitine (1)	Lipid	Fatty Acid Metabolism(Acyl Carnitine)		53481617		HMDB13127	0.007598	0.001612	2.76977e-06	0.0108	0.02284	0.636276	0.008022	0.00196	4.75943e-05	0.006366	0.00285	0.02611	0.000869	0.003178	0.784673
43266	0.543416	0.104371	0.03132	0.302233	2-aminophenol sulfate	Xenobiotics	Chemical		181670		HMDB61116	0.001071	0.001808	0.55364	-0.1496	0.02506	3.15069e-09	-0.00091	0.002285	0.689594	0.004561	0.002827	0.107568	-0.00492	0.003512	0.161466
43343	0.302922	0.123166	0.02081	0.439248	2-aminooctanoate	Lipid	Fatty Acid, Amino	644-90-6	69522		HMDB00991	0.001634	0.000978	0.0951125	-0.09599	0.01357	2.61498e-12	0.002116	0.00122	0.0831718	-2.48e-06	0.00164	0.998797	0.002556	0.001866	0.171041
43374	0.728858	0.084996	0.5	0.074267	indolin-2-one	Xenobiotics	Food Component/Plant	59-48-3	321710	C12312		0.003929	0.001499	0.0089032	0.03674	0.0212	0.0834235	0.003311	0.001804	0.0668748	0.005046	0.002765	0.0688045	-0.00235	0.002933	0.423945
43378	0.284659	0.120096	0.5	0.046658	S-methylcysteine sulfoxide	Amino Acid	Methionine, Cysteine, SAM and Taurine Metabolism	6853-87-8	82142		HMDB29432	0.003439	0.001008	0.000666316	0.07373	0.01407	1.88999e-07	0.004454	0.001243	0.000360068	0.001561	0.001735	0.368806	0.002435	0.001983	0.219546
43400	0.232548	0.129751	0.1255	0.25573	2-piperidinone	Xenobiotics	Food Component/Plant	675-20-7	12665		HMDB11749	-0.00044	0.001495	0.770691	-0.1421	0.02097	1.93875e-11	0.000731	0.001825	0.689013	-0.0031	0.002624	0.238536	0.002575	0.002914	0.377108
43424				0.132736	dimethyl sulfone	Xenobiotics	Chemical	67-71-0	6213	C11142	HMDB04983	0.007258	0.001926	0.000173471	0.01176	0.02715	0.664933	0.008736	0.002413	0.000313879	0.004484	0.003262	0.170078	0.00364	0.003774	0.335004
43488	0.362821	0.118893	0.002295	0.311706	N-acetylcarnosine	Amino Acid	Histidine Metabolism	56353-15-2	9903482		HMDB12881	-0.00119	0.000739	0.109073	-0.2596	0.01035	8.33492e-112	-0.0001	0.000904	0.913383	-0.00343	0.001284	0.00794913	0.003683	0.001361	0.00687089
43493	0.416361	0.133585	0.009793	0.266696	formiminoglutamate	Amino Acid	Histidine Metabolism	816-90-0	439233	C00439	HMDB00854	0.003707	0.001094	0.000728225	-0.1885	0.01518	2.42593e-33	0.003782	0.001378	0.00621152	0.004053	0.001768	0.0224393	-3e-05	0.002087	0.989601
43507	0.438011	0.122113	0.4231	0.184215	3b-hydroxy-5-cholenoic acid	Lipid	Secondary Bile Acid Metabolism	5255-17-4	92997		HMDB00308	0.001094	0.001278	0.392228	0.007598	0.01788	0.670993	0.00028	0.001577	0.85917	0.003126	0.00221	0.15807	-0.00281	0.002453	0.251856
43549	0.467965	0.117515	6.251e-05	0.411103	N-formylanthranilic acid	Amino Acid	Tryptophan Metabolism	3342-77-6	101399	C05653	HMDB04089	0.0019	0.001094	0.0828159	-0.04268	0.01512	0.0048346	0.001382	0.001355	0.307847	0.002845	0.001839	0.122796	-0.00145	0.002099	0.488384
43582	0.388316	0.119956	0.001704	0.343513	5-(galactosylhydroxy)-L-lysine	Amino Acid	Lysine Metabolism	32448-36-5				0.005946	0.000575	5.5251e-24	0.02037	0.008005	0.0110654	0.006372	0.000709	1.82812e-18	0.005123	0.00097	2.14144e-07	0.001271	0.00111	0.25242
43591	0.538771	0.105127	0.002232	0.400099	N2,N5-diacetylornithine	Amino Acid	Urea cycle; Arginine and Proline Metabolism	39825-23-5	10398396			0.009283	0.0012	2.23821e-14	-0.06531	0.01659	8.73387e-05	0.009976	0.001474	2.51967e-11	0.008607	0.002073	4.09458e-05	0.000756	0.002262	0.738208
43761	0.121181	0.12247	0.3996	0.11759	2-aminoheptanoate	Lipid	Fatty Acid, Amino	1115-90-8	227939			0.001606	0.000804	0.0459202	-0.03258	0.01129	0.00399115	0.001848	0.001	0.0651202	0.000617	0.001352	0.648244	0.001192	0.001576	0.449447
43802	0.234407	0.121722	0.09156	0.0624187	guanidinoacetate	Amino Acid	Creatine Metabolism	352-97-6	763	C00581	HMDB00128	-0.00097	0.000474	0.0409717	-0.09076	0.006685	4.2314e-39	-0.00062	0.000574	0.27999	-0.0016	0.00081	0.0494093	0.001305	0.000892	0.143458
43807	0.745513	0.09952	3.698e-09	0.697298	bilirubin (Z,Z)	Cofactors and Vitamins	Hemoglobin and Porphyrin Metabolism	635-65-4	5280352	C00486	HMDB00054	0.001883	0.000604	0.00185935	-0.08172	0.008328	6.6499e-22	0.001946	0.000727	0.00758002	0.001808	0.001109	0.103932	-0.00011	0.001096	0.92336
43829	0.577891	0.115764	2.282e-05	0.397266	gamma-glutamylvaline	Peptide	Gamma-glutamyl Amino Acid	2746-34-1	7015683		HMDB11172	0.003786	0.00069	5.11068e-08	-0.06545	0.009594	1.43253e-11	0.004877	0.000858	1.87901e-08	0.001829	0.001143	0.11041	0.00353	0.001317	0.00742157
43847	0.296726	0.104943	0.0003288	0.365086	glycerol 3-phosphate	Lipid	Glycerolipid Metabolism	29849-82-9	754	C00093	HMDB00126	0.000864	0.000794	0.276342	-0.00771	0.01094	0.480992	0.00282	0.000976	0.0039784	-0.00287	0.00135	0.0343893	0.005948	0.001531	0.000107481
443	0.6696	0.104946	1.276e-13	0.674171	aspartate	Amino Acid	Alanine and Aspartate Metabolism	56-84-8	5960	C00049	HMDB00191	-0.00069	0.000541	0.199936	-0.0803	0.007426	4.95109e-26	-0.00065	0.000679	0.338517	-0.00056	0.000896	0.532349	0.000523	0.00102	0.608449
44526	0.264191	0.114317	0.01222	0.230439	3-methyl-2-oxobutyrate	Amino Acid	Leucine, Isoleucine and Valine Metabolism	3715-29-5	49	C00141	HMDB00019	-0.00032	0.000339	0.340851	-0.03681	0.004716	1.33275e-14	4.3e-05	0.000417	0.9173	-0.00116	0.00058	0.0459875	0.000941	0.000643	0.143592
44618	0.244814	0.117828	0.0368	0.254969	3-methoxytyramine sulfate	Amino Acid	Tyrosine Metabolism					0.002532	0.001169	0.0304765	0.038	0.01643	0.0209261	0.00278	0.001506	0.0653578	0.002189	0.00184	0.234928	0.001037	0.002243	0.643937
44620	0.631376	0.117038	5.385e-06	0.461574	4-acetylphenol sulfate	Xenobiotics	Drug - Other		4684006			-8.95e-06	0.002012	0.996451	-0.02728	0.02768	0.324417	-0.00102	0.002536	0.686339	0.00235	0.003225	0.466678	-0.00551	0.003867	0.154452
44621	0.584541	0.121422	0.5	0	1-(1-enyl-oleoyl)-GPE (P-18:1)*	Lipid	Lysoplasmalogen					0.003428	0.001072	0.00143488	0.05466	0.01506	0.000294869	0.004241	0.001348	0.00173536	0.001634	0.00174	0.348448	0.004055	0.002077	0.0510131
44656	0.166554	0.12113	0.5	0.0551796	isovalerate (i5:0)	Amino Acid	Leucine, Isoleucine and Valine Metabolism	503-74-2	10430	C08262	HMDB00718	0.000699	0.001014	0.490655	-0.1201	0.01426	1.10724e-16	0.000761	0.001325	0.56556	0.000832	0.001518	0.583785	-0.00021	0.002011	0.918508
44664	0.776018	0.101631	1.518e-06	0.601754	glutarylcarnitine (C5-DC)	Amino Acid	Lysine Metabolism	102636-82-8	71464488		HMDB13130	0.001123	0.000752	0.13565	-0.05729	0.01043	4.82293e-08	0.001728	0.000938	0.0658811	-3e-05	0.001238	0.983889	0.002433	0.001321	0.0655879
44675	0.43443	0.122249	0.04068	0.246082	docosahexaenoate (DHA; 22:6n3)	Lipid	Polyunsaturated Fatty Acid (n3 and n6)	6217-54-5	445580	C06429	HMDB02183	0.006017	0.000956	4.47261e-10	0.09111	0.01342	1.76328e-11	0.006135	0.001164	1.74225e-07	0.00612	0.00168	0.000308217	-0.00115	0.001826	0.528546
44681	0.493838	0.13306	0.003418	0.308107	palmitoylcarnitine (C16)	Lipid	Fatty Acid Metabolism(Acyl Carnitine)	6865-14-1	461	C02990	HMDB00222	0.002545	0.000468	6.61772e-08	-0.03917	0.006547	2.91412e-09	0.003267	0.000555	5.87647e-09	0.001227	0.000872	0.160588	0.002397	0.000886	0.00688036
44688	0.395773	0.112121	1.548e-05	0.478713	maltotriose	Carbohydrate	Glycogen Metabolism	1109-28-0	439586	C01835	HMDB01262	-0.00169	0.002595	0.515473	0.03563	0.03572	0.318648	-0.00125	0.003207	0.69695	6.4e-05	0.004418	0.988414	0.004104	0.004972	0.409231
44872	0.630926	0.109493	1.406e-06	0.509479	gamma-glutamylmethionine	Peptide	Gamma-glutamyl Amino Acid	17663-87-5	7009567		HMDB29155	0.000544	0.000437	0.213546	-0.0677	0.006052	1.24753e-27	0.000742	0.000535	0.165574	0.000318	0.000764	0.676974	0.000642	0.000845	0.447351
44876				0.460135	gamma-CEHC	Cofactors and Vitamins	Tocopherol Metabolism	178167-75-4	133098		HMDB01931	-0.00068	0.001061	0.521045	0.0585	0.01471	7.43148e-05	0.000199	0.001293	0.877824	-0.00361	0.001839	0.050478	0.003206	0.002017	0.112174
44877	0.51785	0.11252	0.09077	0.209907	N-palmitoyl-sphingosine (d18:1/16:0)	Lipid	Ceramides	24696-26-2	5283564		HMDB04949	0.001694	0.000403	2.82993e-05	0.03043	0.005637	8.17639e-08	0.002509	0.000486	3.16253e-07	9.7e-05	0.000719	0.892386	0.002826	0.000775	0.000273736
44878	0.444424	0.12859	0.02188	0.410405	methionine sulfone	Amino Acid	Methionine, Cysteine, SAM and Taurine Metabolism	820-10-0	69961			0.005173	0.000717	1.00336e-12	0.09665	0.01002	3.01385e-21	0.006547	0.00088	2.48709e-13	0.002474	0.001206	0.0408736	0.003225	0.001269	0.0110973
45095	0.630958	0.105373	0.5	0.222099	2-methylbutyrylcarnitine (C5)	Amino Acid	Leucine, Isoleucine and Valine Metabolism	31023-25-3	6426901		HMDB00378	0.002087	0.000774	0.00712226	-0.08778	0.01075	8.32693e-16	0.00234	0.000952	0.0141568	0.001527	0.001352	0.259601	0.000801	0.001506	0.594963
45404	0.38585	0.122864	0.1455	0.201498	N-acetylalliin	Xenobiotics	Food Component/Plant					-0.00128	0.002271	0.573128	-0.1235	0.03144	9.05317e-05	0.002	0.00278	0.472165	-0.005	0.00397	0.208726	0.008423	0.004422	0.0570427
45413	0.363891	0.115869	0.491	0.152596	O-sulfo-L-tyrosine	Xenobiotics	Chemical		514186			0.000656	0.000533	0.219044	0.001729	0.007483	0.817285	0.000679	0.000653	0.298777	0.000765	0.00093	0.411588	-0.0001	0.001022	0.921012
45415	0.453388	0.122122	0.0001466	0.36465	3-(3-hydroxyphenyl)propionate sulfate	Xenobiotics	Benzoate Metabolism	86321-32-6	187488			0.00709	0.002419	0.00344617	0.003628	0.03341	0.913547	0.008693	0.002908	0.00288899	0.004561	0.004323	0.29203	0.007786	0.004675	0.0960667
45951	0.215127	0.126772	0.1345	0.161632	1-linolenoyl-GPC (18:3)*	Lipid	Lysophospholipid				HMDB10388	0.000804	0.000845	0.341457	0.02739	0.01188	0.0213511	0.002296	0.001063	0.0310825	-0.00222	0.001353	0.101028	0.005257	0.001633	0.00130976
45968	0.415726	0.119446	0.0683	0.165068	1-oleoyl-GPG (18:1)*	Lipid	Lysophospholipid					-0.001	0.001807	0.580245	-0.00628	0.02563	0.806509	-0.00085	0.002247	0.704216	-0.00264	0.003127	0.39979	0.000523	0.00361	0.884755
46111	0.419967	0.114112	3.76e-05	0.380023	guaiacol sulfate	Xenobiotics	Benzoate Metabolism		22473		HMDB60013	0.004347	0.001207	0.000331282	-0.0418	0.01674	0.0126667	0.00506	0.001505	0.000806699	0.00286	0.001991	0.151698	0.002848	0.002284	0.21257
46115	0.31017	0.109766	0.001822	0.365392	21-hydroxypregnenolone disulfate	Lipid	Pregnenolone Steroids	1164-98-3	134595			-0.00838	0.001165	1.13668e-12	-0.1421	0.01627	8.50164e-18	-0.00918	0.00146	5.49802e-10	-0.00718	0.0019	0.000184871	-0.00201	0.002193	0.359329
46142	0.537405	0.127449	0.1153	0.263704	mannitol/sorbitol	Carbohydrate	Fructose, Mannose and Galactose Metabolism		5780	C00794	HMDB00247	0.008234	0.001372	2.68695e-09	0.02415	0.01909	0.205959	0.00846	0.001718	1.03219e-06	0.006994	0.002272	0.00225025	0.001013	0.002675	0.704913
46144	0.476694	0.113226	7.397e-06	0.498731	methyl glucopyranoside (alpha + beta)	Xenobiotics	Food Component/Plant					0.008444	0.001848	5.39913e-06	0.07984	0.02565	0.00189951	0.009439	0.002285	4.00069e-05	0.005768	0.003136	0.0666458	0.002232	0.003514	0.525433
46146	0.217406	0.117675	0.1152	0.12229	4-methylcatechol sulfate	Xenobiotics	Benzoate Metabolism					0.003641	0.001291	0.00488517	0.07684	0.01833	2.967e-05	0.002737	0.001622	0.0918871	0.005726	0.002168	0.00861573	-0.002	0.002565	0.436396
46165	0.043528	0.101242	0.5	0	3-methyl catechol sulfate (1)	Xenobiotics	Benzoate Metabolism					0.004994	0.001954	0.0107438	-0.1191	0.02756	1.67331e-05	0.004848	0.002438	0.0470902	0.005443	0.003308	0.100749	0.000605	0.003849	0.875106
46172	0.350304	0.12174	0.006229	0.256439	5alpha-pregnan-3(alpha or beta),20beta-diol disulfate	Lipid	Progestin Steroids		5127902			-0.015	0.002229	2.72768e-11	-0.09751	0.03127	0.0018635	-0.01948	0.002786	5.87972e-12	-0.00619	0.00364	0.0900598	-0.01566	0.004211	0.000207126
46173	0.249903	0.117915	0.03517	0.137771	aconitate [cis or trans]	Energy	TCA Cycle					0.003254	0.000349	6.61703e-20	0.01731	0.004898	0.000425414	0.003467	0.000435	5.84375e-15	0.002987	0.000592	7.26257e-07	0.000718	0.000665	0.280561
46223	0.41026	0.131828	0.04489	0.167296	linoleoylcarnitine (C18:2)*	Lipid	Fatty Acid Metabolism(Acyl Carnitine)	36816-10-1	6450015		HMDB06469	0.002098	0.000523	6.38663e-05	-0.0567	0.007291	1.61014e-14	0.002502	0.000641	0.000103033	0.001042	0.000897	0.246262	0.001185	0.000986	0.22981
46225	0.66419	0.116921	8.264e-06	0.709188	pyroglutamine*	Amino Acid	Glutamate Metabolism	2353-44-8	134508			0.003167	0.000949	0.000875018	-0.2955	0.01312	1.55239e-93	0.003087	0.001199	0.0102155	0.0034	0.001507	0.0246253	0.003114	0.001591	0.0504508
46259	0.256976	0.129469	0.1656	0.119007	X - 21258	Unknown						0.002265	0.001649	0.169953	-0.04445	0.02295	0.0529575	0.001651	0.002024	0.414956	0.002842	0.002838	0.317272	-0.00221	0.003207	0.491431
46260	0.347966	0.11852	0.4799	0.0958321	X - 11564	Unknown						0.003429	0.000415	3.91629e-16	-0.03747	0.005816	1.71109e-10	0.004182	0.000517	2.46429e-15	0.001936	0.000678	0.00451673	0.002138	0.000787	0.0066254
46261	0.493038	0.135297	0.006187	0.281288	X - 19438	Unknown						-0.00267	0.000944	0.00466526	-0.1014	0.01306	1.75207e-14	-0.00283	0.001146	0.0138553	-0.00235	0.001676	0.162019	7.4e-05	0.001844	0.968042
46266	0.145451	0.113679	0.4063	0.0813494	X - 15486	Unknown						0.005161	0.001019	4.78364e-07	-0.02792	0.01425	0.0502675	0.006168	0.00124	8.06036e-07	0.002809	0.001799	0.11927	0.002341	0.001987	0.238969
46283	0.265689	0.118922	0.03669	0.189088	X - 15461	Unknown						0.004889	0.00059	3.39515e-16	0.00654	0.008316	0.431751	0.006183	0.000719	4.51017e-17	0.002331	0.001027	0.0239313	0.003944	0.001128	0.000483949
46294	0.174729	0.117702	0.136	0.253763	X - 21285	Unknown						-0.00431	0.002408	0.0735926	-0.2109	0.03383	6.31346e-10	-0.00648	0.002952	0.028457	-0.00113	0.004167	0.786403	-0.00808	0.00456	0.0766685
46295	0.511279	0.109901	0.5	0.183826	X - 21286	Unknown						0.00313	0.001045	0.00279867	0.04797	0.01468	0.00111518	0.002626	0.001294	0.0427749	0.004239	0.001781	0.0178016	-0.00089	0.001966	0.651074
46315	0.199843	0.121271	0.5	0.0353812	X - 16083	Unknown						0.005655	0.002468	0.0221848	0.1538	0.03478	1.06815e-05	0.003793	0.003184	0.234067	0.009195	0.003771	0.0152226	-0.00502	0.004879	0.304102
46347	0.580728	0.11083	2.34e-06	0.463749	X - 11381	Unknown						0.000848	0.000721	0.239856	-0.02971	0.0101	0.0033464	0.001866	0.000891	0.0364847	-0.00139	0.001216	0.254139	0.003265	0.001232	0.00811698
46355	0.338187	0.119721	0.003291	0.226168	X - 09789	Unknown						0.00398	0.001212	0.00105384	0.008324	0.01694	0.623239	0.00418	0.001465	0.00445235	0.003532	0.002147	0.100737	0.000616	0.002324	0.790976
46356	0.359308	0.119403	0.001206	0.349569	X - 21312	Unknown						-0.00496	0.00177	0.00513304	-0.08671	0.02458	0.000436699	-0.00331	0.00215	0.124288	-0.00848	0.003131	0.00708197	0.005108	0.003431	0.136774
46358	0.051001	0.114642	0.5	0	X - 12212	Unknown						0.006138	0.002299	0.00769921	-0.02279	0.03245	0.482476	0.007012	0.002855	0.0142632	0.006114	0.003835	0.111819	0.001874	0.004561	0.681143
46360	0.23336	0.118074	0.5	0.0656738	X - 11441	Unknown						0.003764	0.001653	0.0229986	-0.134	0.02353	1.54068e-08	0.004419	0.002004	0.0277489	0.002511	0.002965	0.397521	0.000874	0.003027	0.772658
46363	0.476195	0.117126	0.01357	0.320336	X - 21319	Unknown						0.000269	0.001032	0.794592	-0.0001	0.01428	0.994589	0.000291	0.001282	0.820257	3.1e-05	0.001718	0.98548	-0.00089	0.001994	0.654305
46364	0.37459	0.120219	0.02275	0.251491	X - 12847	Unknown						-0.00717	0.002266	0.00159122	-0.2379	0.03147	8.31009e-14	-0.0082	0.002818	0.00372497	-0.00593	0.003812	0.120676	-0.00518	0.004454	0.24486
46366	0.675578	0.122336	3.522e-06	0.462587	X - 18249	Unknown						-0.00092	0.000782	0.23711	-0.00169	0.01074	0.875122	-0.00051	0.000959	0.594349	-0.00207	0.001355	0.127503	0.000823	0.001446	0.569133
46368	0.587101	0.12167	7.63e-06	0.522483	X - 18914	Unknown						-0.00096	0.000787	0.224636	-0.02361	0.01086	0.0298457	-0.00032	0.00097	0.744367	-0.00232	0.001357	0.0879478	0.001808	0.001491	0.225513
46384	0.467571	0.120258	7.13e-05	0.349756	X - 21339	Unknown						-0.00491	0.001045	2.97498e-06	-0.1047	0.0147	1.77502e-12	-0.00502	0.001326	0.000164036	-0.00512	0.001655	0.0021114	-0.00051	0.00189	0.786365
46386	0.31086	0.124696	0.01655	0.329191	X - 21341	Unknown						0.000281	0.003312	0.932442	-0.182	0.04585	7.68196e-05	0.000216	0.003953	0.956448	-0.00071	0.006048	0.906549	0.003111	0.006393	0.62659
46388	0.518271	0.122058	0.0001364	0.486638	X - 21343	Unknown						0.001713	0.000769	0.0261067	0.03708	0.01065	0.00051844	0.002496	0.000939	0.00800856	5.5e-05	0.001326	0.96665	0.001333	0.001452	0.35867
46390	0.549324	0.122004	2.727e-05	0.447228	X - 11308	Unknown						-0.00581	0.000864	2.70983e-11	-0.1168	0.01214	3.69011e-21	-0.00511	0.001099	3.79993e-06	-0.00781	0.001342	1.25002e-08	0.001188	0.001439	0.409143
46398	0.282363	0.126126	0.05787	0.22923	X - 21353	Unknown						0.003503	0.000872	6.28039e-05	0.01596	0.01222	0.191877	0.004056	0.001067	0.000156161	0.00217	0.001518	0.153662	0.000919	0.001688	0.586338
46409	0.110587	0.107989	0.4612	0.048457	X - 21364	Unknown						-0.00398	0.001037	0.000130883	-0.1415	0.01465	2.84819e-21	-0.00503	0.001327	0.000165409	-0.0023	0.001622	0.157278	-0.00223	0.00202	0.268926
46417	0.224079	0.114329	0.03661	0.187766	X - 13866	Unknown						0.008115	0.00125	1.30097e-10	-0.00452	0.01749	0.79629	0.009009	0.001554	9.73944e-09	0.006108	0.002115	0.00411756	0.002687	0.002431	0.269123
46428	0.306701	0.135531	0.1532	0.122796	X - 21383	Unknown						-0.00158	0.001311	0.227591	0.02166	0.01833	0.237514	-0.00049	0.001609	0.75926	-0.00347	0.002254	0.124123	0.003141	0.002526	0.213863
46443	0.258382	0.117954	0.5	0.079934	X - 11442	Unknown						0.003369	0.001611	0.0367892	-0.1259	0.02293	4.87187e-08	0.004007	0.001956	0.0408771	0.002132	0.002877	0.459155	0.000971	0.002938	0.740974
46455	0.290217	0.12572	0.01848	0.180335	X - 21410	Unknown						-0.00031	0.002818	0.912749	-0.4903	0.03955	2.83166e-33	0.002349	0.003641	0.519026	-0.00839	0.004274	0.0503041	0.009234	0.005435	0.0895229
46456	0.377176	0.12734	0.107	0.320094	X - 21411	Unknown						6.9e-05	0.001005	0.945629	-0.02074	0.01407	0.140747	0.000389	0.001223	0.750447	-0.00101	0.001777	0.571705	0.002494	0.001957	0.202621
46459	0.101466	0.12626	0.5	0	X - 01911	Unknown						0.003491	0.002441	0.153033	-0.1938	0.03414	1.74256e-08	0.006302	0.003034	0.0381269	-0.0011	0.00411	0.788562	0.007669	0.00476	0.107353
46460	0.126689	0.101021	0.2376	0.117886	X - 11444	Unknown						0.000865	0.000838	0.302427	-0.09846	0.01185	2.74463e-16	0.001699	0.000996	0.0885437	-0.00078	0.001575	0.620803	0.002731	0.001618	0.0916033
46461	0.343317	0.117598	0.5	0.0644547	X - 16124	Unknown						0.003626	0.004154	0.382901	-0.3184	0.05879	7.38953e-08	-0.00066	0.004594	0.886416	0.01184	0.008648	0.171969	-0.0067	0.007841	0.393058
46466	0.310286	0.121221	0.01698	0.267869	X - 11843	Unknown						0.01472	0.003949	0.000202744	0.01306	0.05507	0.81259	0.01068	0.004752	0.0249057	0.02626	0.007039	0.000221091	-0.01781	0.007402	0.0162362
46473	0.204433	0.118975	0.1301	0.140692	X - 15497	Unknown						0.003757	0.00078	1.66484e-06	-0.08278	0.01096	8.40676e-14	0.004572	0.000979	3.59e-06	0.002191	0.001292	0.090815	0.002838	0.001494	0.057704
46486	0.613252	0.102576	2.371e-09	0.689022	X - 21441	Unknown						-0.00658	0.001689	0.00010338	-0.1135	0.02337	1.34937e-06	-0.00846	0.002118	7.05685e-05	-0.00368	0.002739	0.179667	-0.00327	0.003044	0.282148
46487	0.475301	0.112362	3.541e-05	0.389099	X - 21442	Unknown						0.003506	0.004477	0.433694	0.04866	0.06302	0.440218	0.000541	0.005428	0.920624	0.01019	0.00795	0.200512	-0.00105	0.007361	0.886516
46488	0.574498	0.115765	0.004423	0.311235	X - 11847	Unknown						0.002895	0.003588	0.419938	0.06534	0.0499	0.190662	0.005416	0.004354	0.213895	0.001136	0.00627	0.856309	0.003826	0.006941	0.581598
46490	0.416702	0.112109	0.002047	0.34839	X - 17185	Unknown						-0.00226	0.002235	0.313226	-0.1451	0.03092	3.00027e-06	-0.00366	0.002841	0.198208	-0.00018	0.003518	0.959813	-0.00238	0.004269	0.577216
46493	0.252168	0.117933	0.03167	0.231906	X - 21448	Unknown						0.00316	0.001117	0.00473657	-0.1213	0.01568	2.16956e-14	0.003863	0.001348	0.00426166	0.001873	0.002023	0.355156	0.00047	0.002093	0.822503
46497	0.420234	0.117327	0.0002269	0.45278	X - 02269	Unknown						0.01643	0.002387	9.62217e-12	0.03852	0.03342	0.249336	0.01688	0.002861	5.40062e-09	0.01554	0.00432	0.000364634	-0.00107	0.004215	0.798992
46503	0.507639	0.118378	1.848e-05	0.460701	X - 21458	Unknown						0.00525	0.002191	0.0166964	-0.2073	0.0304	1.47519e-11	0.00541	0.002683	0.0441155	0.004939	0.00382	0.196899	0.000545	0.004148	0.895447
46507	0.331441	0.121877	0.00688	0.318051	X - 11850	Unknown						0.01519	0.003747	5.37605e-05	0.06029	0.05219	0.248293	0.01196	0.004508	0.0081476	0.02508	0.006673	0.000198882	-0.01756	0.006979	0.011944
46510	0.813917	0.096176	0.5	0.205225	X - 12544	Unknown						-0.00116	0.002165	0.592679	-0.1572	0.03028	2.43367e-07	-0.00047	0.002374	0.843419	-0.00101	0.004529	0.823343	-0.00039	0.004125	0.925309
46511	0.146194	0.125864	0.5	0	X - 16938	Unknown						0.001571	0.000942	0.0955419	0.01534	0.01352	0.257015	0.002076	0.001138	0.0683543	0.000538	0.001701	0.751954	0.003143	0.001732	0.0696937
46512	0.49341	0.114885	0.1915	0.254678	X - 21467	Unknown						0.000795	0.001145	0.487619	0.02374	0.01596	0.137141	0.001329	0.001427	0.352225	7.3e-05	0.001932	0.969683	0.001933	0.002235	0.387323
46515	0.331468	0.117414	0.00499	0.329647	X - 21470	Unknown						-0.00859	0.00192	8.49839e-06	-0.1974	0.02686	3.73216e-13	-0.00883	0.0024	0.000250455	-0.00914	0.003137	0.00380494	-0.00237	0.003534	0.503285
46516	0.393152	0.121715	0.003161	0.402111	X - 21471	Unknown						-0.00149	0.001266	0.239507	-0.05949	0.01744	0.000667828	-0.00163	0.00158	0.303898	-0.0011	0.002114	0.6025	-0.00128	0.002382	0.590033
46517	0.251491	0.115873	0.06204	0.170431	X - 16946	Unknown						0.00318	0.001093	0.00369016	-0.1089	0.01537	2.34065e-12	0.003511	0.001324	0.00820074	0.002582	0.001958	0.188171	-0.00031	0.002048	0.879061
46519	0.323229	0.12238	0.5	0.121886	X - 21474	Unknown						0.003035	0.002245	0.176742	-0.165	0.03124	1.5197e-07	0.005131	0.002726	0.0602254	-0.0004	0.003977	0.919306	0.005683	0.004349	0.191529
46521	0.071292	0.126787	0.5	0	X - 11852	Unknown						0.005929	0.002763	0.0321412	-0.2857	0.03933	7.06499e-13	0.008883	0.003297	0.0072048	0.001169	0.005234	0.823371	0.006812	0.005606	0.224565
46539	0.367027	0.119166	0.009312	0.31881	N-acetylglucosamine/N-acetylgalactosamine	Carbohydrate	Aminosugar Metabolism		24139		HMDB00215	0.002869	0.00143	0.0450968	0.02215	0.0199	0.265842	0.00399	0.001736	0.021802	0.002197	0.002502	0.380573	0.003882	0.002732	0.155585
46548	0.428953	0.1222	0.0002733	0.436751	3-methylglutarylcarnitine (2)	Amino Acid	Leucine, Isoleucine and Valine Metabolism		128145		HMDB00552	0.008152	0.001178	7.4747e-12	0.136	0.01647	3.87416e-16	0.008926	0.001471	1.96876e-09	0.006994	0.001919	0.000305721	0.001868	0.002119	0.378047
46588	0.511734	0.115718	2.405e-05	0.513793	X - 12063	Unknown						-0.00422	0.001538	0.00613654	-0.1411	0.02152	8.12487e-11	-0.00407	0.001937	0.0361961	-0.00553	0.002395	0.0213794	0.002672	0.002567	0.298055
46590	0.4406	0.126858	0.05395	0.238879	X - 07765	Unknown						-0.00294	0.002137	0.168956	-0.181	0.02972	1.52163e-09	-0.00161	0.002701	0.552567	-0.00825	0.00336	0.0145461	0.004346	0.004183	0.298902
46592	0.766905	0.103091	0.5	0.25367	X - 11299	Unknown						0.00039	0.002012	0.846227	-0.08097	0.0279	0.00377322	-0.00129	0.002469	0.601622	0.004928	0.003438	0.152659	-0.0053	0.003878	0.171986
46594	0.366411	0.125496	0.002039	0.306205	X - 11372	Unknown						-0.00412	0.000803	3.45427e-07	-0.08718	0.01128	2.30486e-14	-0.00379	0.000997	0.00015835	-0.00538	0.001342	7.41663e-05	0.001808	0.001404	0.197979
46595	0.327534	0.115848	0.002352	0.312981	X - 11378	Unknown						-0.00464	0.001502	0.0020681	-0.1256	0.02071	1.74871e-09	-0.00239	0.001814	0.188571	-0.01	0.00268	0.000219209	0.007654	0.002867	0.00768012
46598	0.338187	0.131399	0.01835	0.195558	X - 11438	Unknown						0.00461	0.000923	6.96289e-07	-0.0333	0.01292	0.0100979	0.004996	0.001101	6.6428e-06	0.003402	0.001706	0.046917	0.00176	0.001778	0.322184
46599	0.516971	0.103946	0.0002468	0.464905	X - 11440	Unknown						-0.00712	0.001362	2.01151e-07	-0.2704	0.01897	1.1304e-42	-0.00794	0.001738	5.7713e-06	-0.00625	0.002043	0.00238749	-0.00298	0.002515	0.235616
46600	0.069259	0.133263	0.5	0	X - 11452	Unknown						0.000465	0.001947	0.81144	-0.203	0.02745	2.74275e-13	0.000639	0.002438	0.793419	0.001721	0.003222	0.593562	-0.00256	0.003828	0.503449
46601	0.327867	0.103586	0.0001556	0.38209	X - 11470	Unknown						-0.00183	0.0011	0.0968814	-0.06654	0.01538	1.65417e-05	-0.00141	0.001334	0.289351	-0.0025	0.001967	0.204028	0.001686	0.00208	0.417927
46602	0.239685	0.125802	0.07982	0.186287	X - 11478	Unknown						0.001401	0.001049	0.182292	0.03581	0.01454	0.0139256	0.001231	0.00129	0.340051	0.001496	0.001804	0.407652	-0.00097	0.002017	0.630481
46603	0.288672	0.114091	0.02518	0.240105	X - 11530	Unknown						0.002998	0.000967	0.00198868	-0.1213	0.01352	1.08771e-18	0.00388	0.001167	0.00092803	0.001114	0.001754	0.525688	0.001336	0.001841	0.467968
46607	0.353722	0.123204	0.1313	0.158565	X - 11849	Unknown						0.001862	0.003258	0.567732	0.1083	0.04563	0.0178079	0.005047	0.003989	0.20622	-0.00227	0.005535	0.681706	0.006558	0.006305	0.298397
46608	0.360642	0.122677	0.002071	0.292173	X - 11880	Unknown						-0.00467	0.000875	1.11943e-07	-0.08372	0.0123	1.54858e-11	-0.00447	0.001098	5.12875e-05	-0.00532	0.001425	0.000219061	-0.00077	0.001591	0.629757
46610	0.319346	0.11318	0.09048	0.245283	X - 12007	Unknown						0.007865	0.001841	2.11128e-05	-0.15	0.02575	7.37263e-09	0.007706	0.002292	0.000810699	0.008563	0.003065	0.00548927	-0.00058	0.003603	0.871428
46611	0.374575	0.123809	0.01218	0.232854	X - 12013	Unknown						0.008733	0.002714	0.00132719	0.04139	0.03794	0.275546	0.007141	0.003261	0.0288383	0.01398	0.004929	0.00482894	-0.0083	0.005082	0.102779
46612	0.495495	0.125567	6.562e-05	0.430857	X - 12206	Unknown						0.00343	0.000602	1.502e-08	-0.0018	0.008382	0.830045	0.003637	0.000732	8.18394e-07	0.003487	0.001057	0.00106207	0.000557	0.001083	0.606888
46613	0.26663	0.115458	0.01584	0.296931	X - 12216	Unknown						0.004991	0.00155	0.00131961	0.03263	0.02175	0.13374	0.003332	0.001848	0.0717102	0.008689	0.002841	0.00239039	-0.00503	0.002877	0.0805172
46614	0.288035	0.112814	0.006751	0.238063	X - 12230	Unknown						0.001399	0.001795	0.43584	-0.00117	0.02498	0.962712	-0.00097	0.002241	0.666492	0.006784	0.002966	0.0227505	-0.0057	0.003449	0.0986534
46616	0.27197	0.113329	0.0274	0.181843	X - 12411	Unknown						0.005159	0.00104	8.17215e-07	-0.104	0.01456	1.60009e-12	0.005142	0.001293	7.61421e-05	0.005717	0.001737	0.00108852	-0.00051	0.001992	0.796512
46618	0.351881	0.126642	0.0512	0.290698	X - 12442	Unknown						0.003253	0.000882	0.000238007	0.1114	0.01234	6.82473e-19	0.00408	0.001126	0.000309128	0.001509	0.001374	0.272708	0.002299	0.001705	0.177858
46620	0.333227	0.117071	0.002029	0.381322	X - 12462	Unknown						0.000764	0.000691	0.268808	-0.00911	0.009602	0.343223	6.3e-05	0.000832	0.940056	0.00245	0.001228	0.0468726	-0.00173	0.001359	0.204237
46621	0.068945	0.136075	0.5	0.0260787	X - 12524	Unknown						-0.00073	0.001006	0.47008	0.066	0.01423	3.93037e-06	0.000329	0.001202	0.784266	-0.00254	0.001878	0.17657	0.002465	0.001814	0.174287
46623	0.305475	0.11943	0.00844	0.357178	X - 12729	Unknown						-0.0064	0.001669	0.000132664	0.06692	0.02322	0.00402307	-0.0036	0.002047	0.0792271	-0.01099	0.002827	0.000120855	0.008378	0.00321	0.00914706
46624	0.740035	0.103837	5.888e-11	0.748305	X - 12798	Unknown						-0.00016	0.00118	0.893113	0.01061	0.01631	0.515685	0.000569	0.001464	0.697884	-0.00304	0.001987	0.127486	0.004748	0.001996	0.0174453
46626	0.337132	0.1254	0.0336	0.234333	X - 12739	Unknown						0.008047	0.001437	2.73381e-08	0.04495	0.02005	0.0251654	0.007839	0.001801	1.51481e-05	0.007864	0.00238	0.0010465	-0.0011	0.002742	0.689165
46627	0.294423	0.13147	0.5	0.0111365	X - 12740	Unknown						-0.0057	0.003336	0.0877716	-0.1297	0.04678	0.00563887	-0.00709	0.003963	0.074157	-0.00524	0.006133	0.393306	-0.0015	0.006578	0.81921
46628	0.419138	0.127998	0.02982	0.283942	X - 12472	Unknown						0.01036	0.001818	1.53154e-08	0.1128	0.02536	9.52215e-06	0.009836	0.002228	1.15043e-05	0.01011	0.003137	0.00138688	-0.00219	0.003481	0.528614
46630	0.465354	0.113917	0.0001201	0.393202	X - 12816	Unknown						0.004355	0.005287	0.410285	-0.01241	0.07408	0.866936	0.002092	0.006442	0.745414	0.008817	0.009301	0.343753	-0.00556	0.00893	0.533714
46632	0.264478	0.12981	0.1964	0.133728	X - 14056	Unknown						-0.00063	0.000687	0.362574	-0.03214	0.00974	0.000994651	-9.96e-07	0.000856	0.999072	-0.00168	0.001164	0.150617	0.003407	0.001326	0.0102616
46633	0.296846	0.103532	0.04594	0.325918	X - 12844	Unknown						-0.00022	0.00071	0.757045	0.02761	0.009972	0.00571022	0.000957	0.00087	0.27176	-0.00314	0.001209	0.00981563	0.004316	0.001364	0.00158503
46634	0.25364	0.109727	0.01821	0.228612	X - 12846	Unknown						0.001512	0.00113	0.181228	-0.1008	0.01584	2.82752e-10	0.003008	0.001333	0.0243182	-0.00216	0.002109	0.306714	0.004468	0.00213	0.0361086
46636	0.601626	0.113615	0.5	0.3101	X - 12849	Unknown						0.003267	0.002448	0.182214	0.06495	0.03427	0.0582871	0.000368	0.002864	0.897904	0.008355	0.004665	0.0741556	-0.01295	0.00464	0.00533116
46639	0.390576	0.11732	0.5	0.007995	X - 12851	Unknown						0.008777	0.002786	0.00167968	0.1286	0.03941	0.00113731	0.005032	0.003371	0.136001	0.01655	0.005066	0.00119123	-0.01521	0.005385	0.00479527
46640	0.590135	0.115949	0.001415	0.329042	X - 15469	Unknown						0.002351	0.000927	0.0113421	-0.08449	0.01292	9.02877e-11	0.002938	0.001122	0.00901642	0.000763	0.00162	0.637906	0.001061	0.001735	0.540843
46643	0.175444	0.114142	0.1114	0.174256	X - 13529	Unknown						0.004584	0.000879	2.22649e-07	-0.07051	0.01238	1.57704e-08	0.005997	0.001128	1.3991e-07	0.001948	0.001357	0.151952	0.004555	0.001701	0.00748638
46645	0.130213	0.103229	0.5	0.0416977	X - 13728	Unknown						0.001432	0.002109	0.497299	0.07998	0.02958	0.00694496	0.001758	0.002531	0.487445	0.001242	0.003835	0.746118	0.001116	0.004169	0.788882
46646	0.171927	0.125668	0.1981	0.135087	X - 13835	Unknown						0.003313	0.002023	0.101915	-0.1305	0.02854	5.32717e-06	0.00518	0.002524	0.0405295	-0.0006	0.003449	0.86126	0.005898	0.003999	0.140485
46652	0.241119	0.128432	0.09498	0.247271	X - 14658	Unknown						0.000663	0.002341	0.777084	-0.02109	0.03247	0.516054	-0.00411	0.002835	0.147492	0.01095	0.004067	0.00739287	-0.01442	0.004463	0.00126492
46655	0.476381	0.120617	0.002763	0.361097	X - 14626	Unknown						-0.00138	0.002348	0.55731	0.1003	0.03249	0.00207566	-0.00532	0.002821	0.059748	0.007493	0.004185	0.0742336	-0.01353	0.004479	0.00257319
46656	0.131636	0.121866	0.5	0	X - 14662	Unknown						0.002134	0.002848	0.453815	-0.1223	0.04027	0.00244449	0.000724	0.003309	0.826905	0.00315	0.005509	0.56777	-0.00281	0.005526	0.611546
46657	0.452399	0.137426	0.03376	0.202789	X - 14939	Unknown						-0.00022	0.001076	0.834727	-0.02308	0.01503	0.124875	-0.00019	0.001362	0.889238	-0.00054	0.001743	0.756372	-0.00056	0.002104	0.790526
46658	0.322042	0.126345	0.2126	0.0365617	X - 15220	Unknown						0.003587	0.001321	0.00672305	0.03371	0.01857	0.0697501	0.005794	0.001641	0.000437295	-0.00071	0.002231	0.751036	0.006162	0.002564	0.016392
46661	0.243283	0.114246	0.07396	0.113671	X - 15245	Unknown						-0.00389	0.001751	0.0264755	0.03485	0.02448	0.154814	-0.00154	0.002123	0.469332	-0.00817	0.003117	0.00915933	0.004964	0.00345	0.150458
46662	0.282373	0.109157	0.009036	0.285392	X - 15492	Unknown						0.004008	0.000803	6.99006e-07	-0.106	0.01129	3.09142e-20	0.004213	0.000997	2.66358e-05	0.003633	0.001342	0.00710639	0.001418	0.001555	0.36192
46664	0.383223	0.124135	0.5	0.0322265	X - 15664	Unknown						0.005326	0.002592	0.0401872	0.06141	0.03677	0.0951652	0.006428	0.003214	0.0459131	0.002195	0.004477	0.624211	0.005095	0.005029	0.311155
46665	0.196161	0.111136	0.0674	0.243579	X - 15674	Unknown						0.001256	0.000931	0.177287	0.08504	0.01305	1.08388e-10	0.002107	0.00111	0.0580654	3.7e-05	0.001692	0.98273	0.001532	0.001807	0.396763
46666	0.58122	0.117365	0.05513	0.277449	X - 15728	Unknown						0.001918	0.002862	0.502758	-0.1562	0.0396	8.43703e-05	0.003258	0.003543	0.358033	-0.00164	0.004787	0.732717	0.004033	0.005477	0.461612
46672	0.45867	0.125275	0.002268	0.315978	X - 17325	Unknown						0.007721	0.002128	0.00029883	0.1216	0.02973	4.62241e-05	0.009652	0.002609	0.000232846	0.004791	0.003679	0.193735	0.004632	0.004172	0.267024
46673	0.311903	0.126023	0.02596	0.316332	X - 16576	Unknown						-0.00085	0.001881	0.652553	0.04149	0.02621	0.113787	-0.00301	0.002311	0.193164	0.003653	0.003271	0.264901	-0.00851	0.003674	0.0207032
46674	0.408529	0.13344	0.01094	0.311662	X - 21607	Unknown						0.001577	0.001125	0.161318	0.03503	0.01551	0.0241064	0.002305	0.00139	0.0977513	6.9e-05	0.001883	0.970897	0.0024	0.002162	0.267083
46677	0.439654	0.116014	0.5	0.221863	X - 16654	Unknown						0.001016	0.002251	0.651904	0.03346	0.03156	0.289288	-0.00093	0.00275	0.735243	0.003965	0.003905	0.310639	-0.0045	0.004359	0.302218
46681	0.360256	0.115704	0.000437	0.366299	X - 16935	Unknown						-0.00934	0.001638	1.52171e-08	-0.1401	0.02292	1.30592e-09	-0.01162	0.002045	1.87803e-08	-0.00483	0.00271	0.0755454	-0.00693	0.002898	0.0169112
46683	0.153312	0.121635	0.2522	0.121708	X - 16944	Unknown						0.001191	0.000998	0.232833	0.02576	0.01393	0.0647134	0.001787	0.001248	0.15253	-0.0005	0.00165	0.763114	0.001025	0.001924	0.59443
46684	0.991258	0.002401	8.743e-14	0.893278	X - 12093	Unknown						0.008575	0.002505	0.000639592	0.02376	0.03455	0.491885	0.01006	0.003038	0.000964763	0.008147	0.004489	0.0703406	0.003044	0.003403	0.37118
46686	0.469867	0.121617	0.5	0.0383	X - 17137	Unknown						0.004572	0.002641	0.0836872	0.0656	0.03735	0.0792862	0.005179	0.003274	0.114135	0.002451	0.004563	0.591504	0.004748	0.005114	0.353305
46687	0.166747	0.129433	0.5	0.117192	X - 18779	Unknown						-0.00064	0.000506	0.208712	-0.0045	0.007086	0.525782	-0.00056	0.000636	0.375094	-0.00047	0.000822	0.571834	0.000119	0.001014	0.90665
46689	0.447347	0.111191	0.003056	0.308607	X - 17145	Unknown						0.006413	0.001701	0.000171221	-0.08691	0.02373	0.000261372	0.005098	0.002124	0.0166039	0.008618	0.00284	0.00258354	-0.00232	0.003297	0.482414
46690	0.30247	0.124616	0.02483	0.256443	X - 18901	Unknown						0.006737	0.001821	0.000226144	0.1388	0.02539	5.65387e-08	0.008426	0.002276	0.000228512	0.003459	0.002991	0.248166	0.002792	0.003487	0.423376
46691	0.793458	0.090281	1.181e-13	0.759343	X - 17146	Unknown						0.001731	0.002416	0.473843	-0.05257	0.03246	0.105649	0.001197	0.002938	0.683787	0.004039	0.004352	0.353914	0.000389	0.00447	0.930709
46695	0.603732	0.11091	0.1743	0.340264	X - 18913	Unknown						-0.00101	0.0008	0.205593	-0.07174	0.01115	1.82386e-10	-0.00127	0.000984	0.195785	-0.00052	0.001369	0.704536	-0.00153	0.001565	0.328598
46700	0.525467	0.120226	3.4e-05	0.39548	X - 18922	Unknown						0.001257	0.001111	0.258132	-0.00364	0.01554	0.815036	3.9e-05	0.001362	0.97737	0.003884	0.001974	0.0499388	-0.00364	0.002118	0.0861413
46701	0.483446	0.116227	2.204e-05	0.517495	X - 19141	Unknown						0.001711	0.001057	0.105532	-0.04728	0.01464	0.00127287	0.003008	0.001308	0.0217201	-0.00123	0.001771	0.489219	0.002848	0.00191	0.136129
46705	0.350535	0.119465	0.002521	0.358024	X - 17438	Unknown						0.006226	0.001719	0.000307044	0.02329	0.024	0.33213	0.004755	0.002054	0.0208707	0.008653	0.00318	0.00682533	-0.00341	0.003353	0.308724
46706	0.269596	0.121264	0.3903	0.168184	X - 17469	Unknown						0.003675	0.002044	0.0723768	-0.01929	0.02855	0.499416	-0.00085	0.002484	0.731027	0.01191	0.003609	0.0010614	-0.0114	0.003946	0.00391535
46707	0.294294	0.111078	0.05894	0.192796	X - 17653	Unknown						-0.0036	0.001037	0.000526306	-0.1043	0.01457	1.48264e-12	-0.00415	0.001286	0.0013124	-0.00298	0.001746	0.0884093	-0.00242	0.002032	0.233406
46709	0.669117	0.067425	0.5	0.066815	X - 17654	Unknown						-0.00405	0.001578	0.0104931	-0.07814	0.02216	0.000436997	-0.00305	0.001791	0.0888322	-0.00627	0.003108	0.0443145	0.00493	0.003003	0.100785
46710	0.412072	0.119856	0.05624	0.23805	X - 17690	Unknown						-0.01042	0.002598	6.46304e-05	-0.1885	0.03628	2.40399e-07	-0.00769	0.003186	0.0159684	-0.01687	0.004529	0.000228671	0.007901	0.005106	0.122025
46728	0.200265	0.12918	0.5	0.0451307	X - 21659	Unknown						0.002555	0.002159	0.237041	-0.1625	0.03017	8.6927e-08	0.00423	0.002644	0.109969	0.000325	0.003765	0.931329	0.003991	0.004187	0.340665
46730	0.453131	0.130238	0.006246	0.290274	X - 21661	Unknown						-0.00023	0.002319	0.921478	0.072	0.03212	0.0251611	-0.00182	0.002865	0.524358	0.004595	0.003915	0.241269	-0.00502	0.004497	0.264753
46733	0.423072	0.123137	0.005405	0.381933	X - 13435	Unknown						0.001815	0.002014	0.36758	-0.2421	0.02779	9.899e-18	0.00382	0.002433	0.116757	-0.0023	0.003612	0.525214	0.005207	0.003799	0.170723
46738	0.782362	0.076965	1.044e-09	0.675945	X - 16071	Unknown						-0.00147	0.000513	0.00422916	-0.08914	0.007033	1.39116e-34	-0.00103	0.000617	0.0962453	-0.00231	0.000934	0.0136719	0.001247	0.000956	0.192331
46798	0.42791	0.123274	0.004842	0.240781	oleoyl-linoleoyl-glycerol (18:1/18:2) [1]	Lipid	Diacylglycerol	106292-55-1			HMDB07219	-0.0009	0.000868	0.301821	-0.02184	0.01212	0.0717655	-0.00015	0.00105	0.88703	-0.00273	0.00154	0.0768302	0.002367	0.001629	0.146315
46799	0.386824	0.125874	0.01098	0.211257	oleoyl-linoleoyl-glycerol (18:1/18:2) [2]	Lipid	Diacylglycerol	104346-53-4			HMDB07219	-0.00091	0.000859	0.290198	-0.00875	0.01198	0.465552	9e-05	0.001029	0.930643	-0.00328	0.001544	0.0345885	0.003499	0.001613	0.0301733
46898	0.104801	0.122135	0.5	0	X - 21729	Unknown						0.00205	0.001828	0.262317	-0.00654	0.0257	0.799243	0.001905	0.002236	0.394713	0.002509	0.003213	0.435281	-0.00041	0.003624	0.909658
46902	0.350498	0.109765	0.000358	0.35854	X - 21733	Unknown						0.005627	0.001514	0.00021191	0.1538	0.02119	7.08448e-13	0.005665	0.001827	0.00200495	0.006095	0.002703	0.0247503	-0.00058	0.002905	0.843052
46904	0.460881	0.130619	0.00217	0.3231	X - 21735	Unknown						0.003871	0.001471	0.00858488	0.08678	0.02035	2.15851e-05	0.002345	0.001787	0.189686	0.006615	0.002599	0.0113412	-0.00294	0.002813	0.295899
46905	0.157806	0.118606	0.178	0.0555408	X - 21736	Unknown						0.005598	0.001156	1.46704e-06	0.02574	0.01623	0.113113	0.004281	0.001415	0.00258216	0.008283	0.001996	4.14021e-05	-0.00342	0.002234	0.125915
46906	0.601256	0.104533	0.5	0.133245	X - 21737	Unknown						0.003944	0.003505	0.260647	0.3928	0.04924	3.52828e-15	0.003077	0.004566	0.500513	0.005292	0.005036	0.294011	-0.00398	0.006844	0.56106
46911	0.385201	0.124245	0.003763	0.361287	X - 21742	Unknown						0.005795	0.003368	0.0855591	0.2816	0.0471	2.97863e-09	0.008372	0.004303	0.0520589	0.00093	0.005164	0.857143	0.00652	0.006499	0.315907
46914	0.328728	0.114571	0.001582	0.344532	X - 11522	Unknown						0.003707	0.000955	0.000108941	-0.1091	0.01333	6.96529e-16	0.004182	0.00115	0.000293241	0.002763	0.001738	0.112761	0.000415	0.001818	0.819374
46923	0.3481	0.119769	0.002607	0.309223	X - 21752	Unknown						0.008238	0.003301	0.0127119	0.1335	0.04593	0.00371677	0.006029	0.003969	0.129131	0.01295	0.005898	0.0286866	-0.00499	0.006133	0.415652
46932	0.132973	0.120842	0.2636	0.0545907	X - 12104	Unknown						0.006227	0.001446	1.82393e-05	0.03611	0.0204	0.0769099	0.005261	0.00176	0.00289315	0.008644	0.00257	0.000855771	-0.00227	0.002834	0.423122
46957	0.366721	0.137485	0.1829	0.184644	gulonate*	Cofactors and Vitamins	Ascorbate and Aldarate Metabolism	20246-53-1	9794176	C00257	HMDB03290	0.005179	0.000802	1.54559e-10	0.01904	0.01143	0.0961262	0.005741	0.000997	1.35811e-08	0.004148	0.001392	0.00306297	0.002369	0.001604	0.139774
46960	0.606788	0.107444	0.008923	0.424832	sulfate*	Xenobiotics	Chemical	14808-79-8	1118	C00059	HMDB01448	0.002224	0.000313	2.04302e-12	0.01403	0.004312	0.00117614	0.002038	0.000384	1.46635e-07	0.00287	0.000543	2.12157e-07	-0.00075	0.000578	0.192577
46966	0.206912	0.121221	0.1317	0.205194	X - 12126	Unknown						0.007438	0.002075	0.000352638	0.03726	0.02906	0.20016	0.006215	0.002517	0.0137876	0.01027	0.003668	0.00539132	-0.00398	0.003908	0.308926
46968	0.505469	0.127033	0.0007646	0.28888	X - 21792	Unknown						0.002812	0.001539	0.0679637	0.1069	0.02144	6.96804e-07	0.001124	0.001929	0.560294	0.006549	0.002524	0.00982086	-0.0032	0.002705	0.237498
46970	0.466536	0.112344	3.659e-06	0.486204	X - 17676	Unknown						0.003617	0.001108	0.0011229	-0.08068	0.01532	1.66675e-07	0.004963	0.001393	0.000389411	0.001745	0.001778	0.326897	0.003231	0.002096	0.123532
46972	0.340225	0.115782	0.001488	0.411696	X - 21796	Unknown						0.001945	0.000515	0.00016771	-0.07561	0.007144	4.46162e-25	0.002464	0.000614	6.54965e-05	0.001041	0.000957	0.277374	0.001168	0.000996	0.240925
46973	0.577954	0.108374	0.5	0.211329	X - 12718	Unknown						0.007099	0.001892	0.000184276	0.02799	0.0266	0.292858	0.008751	0.002295	0.000148437	0.003864	0.003411	0.258045	0.005571	0.003648	0.126972
46977	0.336057	0.124204	0.006098	0.305573	X - 15503	Unknown						0.005595	0.000655	4.20953e-17	-0.01153	0.009101	0.205428	0.006154	0.000811	9.16675e-14	0.004939	0.001119	1.35551e-05	0.00039	0.001252	0.755522
46982	0.149799	0.119317	0.5	0.111527	X - 11838	Unknown						0.002167	0.003242	0.504018	0.2048	0.04582	8.55409e-06	0.000656	0.004176	0.875222	0.004922	0.005093	0.334479	-0.00594	0.006374	0.351777
46986	0.264406	0.121531	0.07146	0.218975	X - 12812	Unknown						0.00648	0.002102	0.00210422	0.1479	0.02943	5.82975e-07	0.004482	0.002547	0.0788921	0.01141	0.003712	0.00226971	-0.00759	0.004102	0.0643374
46989	0.403268	0.122075	0.01793	0.367519	X - 17348	Unknown						0.007461	0.002886	0.00985976	0.1076	0.04032	0.00773191	0.004384	0.003659	0.231297	0.01424	0.004737	0.00287087	-0.00923	0.005621	0.100943
46992	0.116133	0.118082	0.5	0.0450619	X - 21815	Unknown						0.003135	0.002362	0.184739	0.3895	0.0334	8.34151e-30	0.005656	0.003215	0.0789909	-0.00171	0.00277	0.536452	0.00755	0.004677	0.106653
46993	0.353838	0.123216	0.02535	0.318041	X - 21816	Unknown						0.005661	0.001776	0.0014769	0.104	0.02475	2.85578e-05	0.006936	0.002234	0.00197723	0.002568	0.002891	0.374993	0.006559	0.00349	0.0604087
46994	0.311992	0.134738	0.04435	0.164756	X - 17367	Unknown						0.007095	0.001922	0.00023445	0.1006	0.0269	0.000193418	0.008583	0.002401	0.000373156	0.004624	0.00321	0.150667	0.003371	0.003778	0.372384
46997	0.27997	0.125458	0.03022	0.257648	X - 12822	Unknown						0.002794	0.001415	0.0484972	-0.1201	0.01964	1.31044e-09	0.004892	0.001753	0.00538702	-0.00228	0.002347	0.332064	0.006647	0.00267	0.0128985
46998	0.244077	0.117242	0.0282	0.297426	X - 21821	Unknown						0.005616	0.001665	0.000771095	-0.02058	0.02324	0.375954	0.005648	0.00198	0.00445599	0.005328	0.003052	0.0817678	-0.0028	0.003234	0.386346
47000	0.44024	0.123983	0.02464	0.284824	X - 17327	Unknown						0.01217	0.002175	2.76475e-08	0.1044	0.03027	0.00058393	0.01255	0.002673	3.13102e-06	0.01116	0.003756	0.0031584	0.001017	0.004151	0.806593
47006	0.209795	0.113041	0.04362	0.166655	X - 21829	Unknown						0.00455	0.001127	5.79168e-05	-0.03978	0.01574	0.0116501	0.003954	0.001407	0.00507536	0.005455	0.00188	0.00396007	-0.00257	0.002198	0.242896
47008	0.260753	0.127193	0.05395	0.347914	X - 21831	Unknown						0.002912	0.001667	0.080917	0.05731	0.02342	0.0145401	0.002254	0.002064	0.275154	0.004592	0.002843	0.107132	-0.0022	0.003235	0.496923
47009	0.610381	0.121111	1.293e-05	0.460699	X - 17354	Unknown						0.006836	0.002519	0.00675402	0.04295	0.03489	0.218628	0.005043	0.003084	0.102375	0.01136	0.004349	0.00940141	-0.00767	0.004782	0.109145
47011	0.449504	0.108101	0.5	0.116226	X - 21834	Unknown						0.001788	0.002106	0.396107	-0.07615	0.02951	0.00999414	0.001611	0.002613	0.537736	0.001756	0.003552	0.621418	-0.00083	0.004154	0.841213
47013	0.320017	0.13124	0.02127	0.273333	X - 16570	Unknown						0.004841	0.00109	9.87766e-06	0.1261	0.01512	2.15214e-16	0.007241	0.001331	7.13149e-08	0.000108	0.001893	0.95447	0.005432	0.002063	0.00855102
47014	0.283536	0.129561	0.1278	0.216581	X - 12839	Unknown						0.009214	0.001725	1.13812e-07	0.09619	0.0241	6.98834e-05	0.009876	0.002156	5.45135e-06	0.006816	0.002823	0.0162364	2.5e-05	0.003332	0.994095
47015	0.3103	0.126564	0.5	0.0838895	X - 21838	Unknown						0.003028	0.002309	0.19014	0.2032	0.03255	6.07033e-10	0.003286	0.003026	0.277863	0.000916	0.003416	0.788654	-0.00061	0.004553	0.894057
47016	0.136631	0.123486	0.5	0.0440263	X - 21839	Unknown						-0.00339	0.002605	0.194076	-0.0998	0.0368	0.00679085	0.001151	0.003162	0.715903	-0.01373	0.00466	0.00344059	0.01107	0.005096	0.0299844
47019	0.463138	0.124659	0.0086	0.309325	X - 21842	Unknown						0.001057	0.001486	0.476716	-0.03958	0.02036	0.0521893	-6e-05	0.001765	0.971003	0.002892	0.00269	0.283023	-0.00441	0.002864	0.124095
47022	0.241492	0.122165	0.5	0.0416813	X - 21845	Unknown						-0.00644	0.002248	0.00428116	-0.05679	0.03184	0.0747558	-0.00473	0.00274	0.0848284	-0.01085	0.004027	0.00740428	0.002966	0.004434	0.503747
47101	0.68984	0.104437	1.389e-07	0.564447	N-methylpipecolate	Xenobiotics	Bacterial/Fungal	41447-17-0	11286529			0.006328	0.001552	4.85785e-05	0.02438	0.02138	0.254415	0.006792	0.001898	0.000365398	0.005642	0.002715	0.0383685	0.001211	0.002923	0.678592
47112	0.376139	0.111925	0.003148	0.244554	etiocholanolone glucuronide	Lipid	Androgenic Steroids	621890	270605		HMDB04484	-0.0077	0.001755	1.24668e-05	-0.1572	0.02446	1.88329e-10	-0.01029	0.00213	1.6325e-06	-0.00287	0.003114	0.357923	-0.00786	0.003304	0.0175467
47120	0.388645	0.120588	0.5	0	9-hydroxystearate	Lipid	Fatty Acid, Monohydroxy	25498-28-6	9570127		HMDB61661	0.001266	0.000977	0.195441	0.1721	0.01371	5.35422e-34	0.001102	0.001173	0.347643	0.001651	0.001802	0.360039	-0.00077	0.001917	0.689208
47132	0.376524	0.12462	0.5	0.0564401	5alpha-androstan-3alpha,17beta-diol 17-glucuronide	Lipid	Androgenic Steroids					-0.00532	0.001282	3.574e-05	-0.7475	0.01834	3.07627e-228	-0.00299	0.000978	0.00228377	-0.00936	0.003519	0.0081951	0.00866	0.002471	0.000468804
47135	0.625285	0.116543	5.079e-06	0.529643	11-ketoetiocholanolone glucuronide	Lipid	Androgenic Steroids	17181-16-7				0.006927	0.001833	0.000165241	0.03878	0.02519	0.123973	0.008052	0.002225	0.000313183	0.004158	0.00323	0.198834	0.002368	0.00337	0.482457
47153	0.212056	0.12973	0.4484	0.0635711	sphingomyelin (d18:1/24:1, d18:2/24:0)*	Lipid	Sphingolipid Metabolism	94359-13-4			HMDB12107	0.000861	0.00036	0.0171411	0.04599	0.005099	7.70727e-19	0.001427	0.000423	0.000787191	-0.00011	0.000681	0.87171	0.001738	0.000722	0.0161716
47154	0.284223	0.119431	0.2251	0.132651	sphingomyelin (d18:2/14:0, d18:1/14:1)*	Lipid	Sphingolipid Metabolism					0.00173	0.000538	0.00133192	0.2072	0.007601	3.72596e-127	0.002869	0.000664	1.77527e-05	-0.00066	0.000907	0.466035	0.003857	0.001014	0.000148436
47203				0.392964	X - 13007	Unknown						-0.00203	0.001571	0.196559	-0.01091	0.02186	0.617741	-0.00112	0.001929	0.5622	-0.00359	0.002733	0.190024	0.001789	0.003108	0.565073
47204	0.254982	0.120093	0.03905	0.238525	X - 14904	Unknown						-0.0011	0.001773	0.536553	0.02584	0.02481	0.297744	-0.00097	0.002197	0.65888	-0.00101	0.003016	0.73851	0.000941	0.003534	0.790001
47301	0.488743	0.107266	0.5	0.129566	X - 18887	Unknown						0.003099	0.001305	0.017716	0.1001	0.01827	5.25982e-08	0.003173	0.001655	0.0555489	0.003741	0.002081	0.0730888	0.000106	0.002514	0.966237
47342	0.660917	0.096896	0.5	0.248927	X - 18345	Unknown						0.004401	0.001898	0.0206022	-0.0348	0.02633	0.186577	0.005828	0.00232	0.0121942	0.00078	0.00329	0.812615	0.005739	0.003709	0.121996
47393	0.653929	0.114204	0.01286	0.182194	X - 22147	Unknown						0.002772	0.00199	0.163939	-0.1048	0.0278	0.000171702	0.003127	0.002276	0.169876	0.002431	0.003943	0.537892	0.001858	0.003899	0.633822
47417	0.450084	0.120712	6.274e-05	0.474553	X - 22162	Unknown						0.002944	0.000579	4.32413e-07	0.01195	0.008042	0.137496	0.003051	0.000708	1.81155e-05	0.002821	0.000995	0.00482534	0.000193	0.00107	0.856555
47437	0.606636	0.100699	0.5	0.287841	X - 12680	Unknown						0.004972	0.001416	0.000461574	-0.03282	0.01972	0.096335	0.006195	0.001721	0.000338069	0.003027	0.002501	0.226779	0.004254	0.002719	0.11798
47439	0.412552	0.120227	0.5	0.161018	X - 13507	Unknown						0.005163	0.001871	0.00590387	-0.08155	0.02621	0.0019074	0.006394	0.002238	0.00441411	0.002788	0.003427	0.41654	0.003584	0.003656	0.327074
47441	0.21127	0.118494	0.2154	0.105916	X - 13737	Unknown						0.003236	0.000475	1.58581e-11	-0.05841	0.006654	6.05843e-18	0.003408	0.000612	3.60024e-08	0.002866	0.000723	8.85478e-05	0.000542	0.000936	0.563014
47478	0.311277	0.12699	0.3303	0.130611	X - 10458	Unknown						-0.00134	0.001321	0.308985	0.02777	0.01853	0.134245	-0.00056	0.001585	0.721866	-0.00256	0.002383	0.282876	0.002795	0.002517	0.266886
47493	0.433492	0.113225	0.03885	0.218387	X - 11632	Unknown						0.000421	0.001411	0.76553	-0.00956	0.01959	0.625644	0.001826	0.001713	0.286881	-0.00166	0.00251	0.508257	0.004541	0.002733	0.0968289
47497	0.32197	0.128877	0.1638	0.186532	X - 11640	Unknown						0.000702	0.00173	0.685176	0.09376	0.02404	0.000101843	-0.00031	0.002199	0.889469	0.002257	0.002695	0.402946	-0.00281	0.00335	0.402017
47639	0.337991	0.114421	0.01537	0.317919	X - 12456	Unknown						-0.00014	0.001707	0.932378	-0.06465	0.0239	0.00693983	-0.00074	0.002052	0.718073	0.001021	0.00311	0.742834	0.00098	0.003187	0.758436
47642	0.678537	0.1093	0.004234	0.253398	X - 12101	Unknown						0.00545	0.00111	1.03917e-06	0.04602	0.01552	0.0030889	0.005571	0.001394	7.00064e-05	0.00502	0.001843	0.0067542	0.001252	0.002106	0.552274
47650	0.375239	0.128865	0.2014	0.165962	X - 11483	Unknown						-0.00033	0.001878	0.86057	-0.08371	0.02615	0.00140444	-0.0006	0.002349	0.798716	0.001518	0.003109	0.625626	-0.00082	0.003648	0.822639
47651	0.705027	0.111527	2.028e-08	0.614207	X - 11491	Unknown						0.005428	0.002158	0.0120198	-0.1917	0.02993	2.15004e-10	0.007962	0.00276	0.00402052	0.000348	0.00332	0.916555	0.001791	0.003617	0.620543
47652	0.077509	0.115999	0.5	0.0419722	X - 11549	Unknown						-0.00804	0.001622	8.38007e-07	-0.1202	0.02303	2.11002e-07	-0.00864	0.001984	1.51248e-05	-0.00711	0.002915	0.0152172	-0.00168	0.003186	0.598863
47653	0.64647	0.107862	0.5	0.0318474	X - 11593	Unknown						0.00478	0.000547	8.52595e-18	0.00502	0.007724	0.515882	0.005851	0.000684	6.54683e-17	0.00266	0.000895	0.00314988	0.002691	0.000997	0.00703178
47654	0.446159	0.128017	0.0009859	0.386813	X - 11858	Unknown						0.000274	0.003546	0.938449	0.08963	0.04865	0.0656642	0.001033	0.004334	0.811754	0.002471	0.006186	0.689816	0.000139	0.006769	0.983613
47657	0.340292	0.128027	0.009956	0.217795	X - 12261	Unknown						0.009314	0.002257	3.96161e-05	0.008859	0.03154	0.778843	0.009117	0.002698	0.000761531	0.01172	0.004163	0.00515149	-0.00554	0.004262	0.194207
47662	0.378633	0.122337	0.5	0.145909	X - 12830	Unknown						-0.00294	0.002705	0.277747	-0.0748	0.03825	0.050743	-0.00066	0.003251	0.837983	-0.00842	0.004895	0.0861884	0.006673	0.005237	0.202811
47664	0.133996	0.117263	0.2582	0.129715	X - 13658	Unknown						0.007519	0.002003	0.000183828	0.007354	0.02837	0.795485	0.007815	0.00241	0.00122839	0.005967	0.00347	0.0864379	0.004312	0.003663	0.239261
47666	0.206345	0.128799	0.2281	0.249777	alpha-CEHC sulfate	Cofactors and Vitamins	Tocopherol Metabolism					0.01533	0.002119	8.89977e-13	0.01335	0.02968	0.653016	0.01533	0.002567	3.63908e-09	0.01462	0.00375	0.000115289	0.000565	0.003997	0.887673
47670	0.168937	0.126552	0.2049	0.041977	X - 18899	Unknown						-0.0027	0.000817	0.000983699	-0.00724	0.01148	0.528317	-0.00182	0.001	0.0693173	-0.00486	0.001436	0.00080024	0.002714	0.001601	0.0903881
47671	0.643085	0.108317	0.0825	0.329779	X - 18921	Unknown						0.002079	0.000986	0.035263	-0.00838	0.01359	0.537477	0.002015	0.001219	0.0986566	0.001466	0.001662	0.378247	-0.00067	0.001875	0.72017
47672	0.405313	0.123265	0.003389	0.336195	X - 19183	Unknown						0.003143	0.001697	0.0643162	-0.1728	0.02346	3.34731e-13	0.003315	0.001873	0.0771985	0.002573	0.003476	0.459618	0.001598	0.003319	0.630299
47673	0.465424	0.118643	0.5	0.0855999	X - 19299	Unknown						0.005106	0.002602	0.0499997	0.006325	0.03657	0.862739	0.00536	0.003201	0.0944662	0.003567	0.004489	0.427422	0.001262	0.005163	0.806911
47687	0.360545	0.117408	0.001245	0.302194	X - 12100	Unknown						0.003339	0.000396	9.17477e-17	0.01814	0.005494	0.000990188	0.003816	0.000498	5.03101e-14	0.002434	0.000632	0.000138433	0.001433	0.00073	0.0499919
47690	0.864156	0.090055	1.961e-13	0.854745	X - 12112	Unknown						0.003129	0.001783	0.0794645	-0.02153	0.02439	0.377505	0.002859	0.002189	0.191893	0.003654	0.003087	0.237248	0.000267	0.003002	0.929174
47695	0.602083	0.109637	9.267e-09	0.506057	X - 12117	Unknown						0.009893	0.001105	1.3472e-18	0.009285	0.01532	0.544538	0.01107	0.001389	5.49054e-15	0.007693	0.001803	2.50395e-05	0.004067	0.002019	0.0440724
47702	0.523237	0.114538	5.806e-07	0.491643	X - 12127	Unknown						0.002835	0.001001	0.00469991	-0.016	0.01389	0.249418	0.002314	0.001257	0.0660673	0.003792	0.001642	0.0215033	-0.00141	0.001896	0.456903
47708	0.340874	0.115666	0.003598	0.388283	X - 12283	Unknown						0.008737	0.001814	1.65701e-06	-0.02293	0.02518	0.362741	0.009194	0.002174	2.63968e-05	0.007965	0.00329	0.0159834	-9e-05	0.003499	0.978895
47718	0.476311	0.120638	0.0001268	0.495903	X - 12688	Unknown						0.003348	0.00065	3.08662e-07	0.01784	0.009041	0.0486395	0.003248	0.000791	4.43572e-05	0.003926	0.001145	0.000673271	0.000257	0.001165	0.825615
47739	0.455903	0.12567	0.000651	0.403494	X - 22475	Unknown						0.007449	0.001868	7.13563e-05	-0.1522	0.02593	5.6843e-09	0.006252	0.002099	0.00298602	0.009559	0.003753	0.0112839	-0.0043	0.003612	0.233996
47773	0.626376	0.11789	7.523e-07	0.566114	X - 22509	Unknown						0.0085	0.002617	0.00119345	0.05137	0.03606	0.154572	0.006197	0.003186	0.052114	0.01419	0.004561	0.00201365	-0.0067	0.004959	0.177022
47774	0.048448	0.116701	0.5	0	X - 13689	Unknown						0.01225	0.002486	9.41102e-07	-0.02139	0.03554	0.54741	0.0126	0.003053	4.09237e-05	0.01167	0.004517	0.0101545	-8e-05	0.004835	0.98648
47783	0.234586	0.112288	0.02294	0.269254	X - 22519	Unknown						0.004925	0.001461	0.000777196	-0.09753	0.02058	2.40342e-06	0.005348	0.001776	0.00268656	0.004447	0.002616	0.0899747	0.000316	0.002787	0.909796
47784	0.148215	0.120404	0.5	0.0518374	X - 22520	Unknown						0.004534	0.002179	0.0377461	-0.04321	0.03059	0.157986	0.001168	0.002665	0.661243	0.01168	0.00379	0.00221307	-0.0116	0.004261	0.00655193
47787	0.236281	0.123824	0.05306	0.180848	X - 14838	Unknown						0.00578	0.001562	0.00022688	-0.1284	0.02199	6.81955e-09	0.006624	0.001946	0.000699386	0.004007	0.002679	0.135627	0.002295	0.00308	0.456369
47788	0.286601	0.109625	0.003375	0.377755	X - 13431	Unknown						0.005508	0.001579	0.000502667	-0.07499	0.02178	0.000595416	0.006786	0.001894	0.000362364	0.004493	0.002895	0.121591	0.004981	0.003018	0.0990602
47800	0.428986	0.111674	6.468e-05	0.362126	X - 15666	Unknown						0.000961	0.00056	0.0860418	-0.02631	0.007806	0.000775134	0.001059	0.000681	0.120606	0.000934	0.000994	0.348219	-0.00031	0.001084	0.774301
47802	0.270499	0.120737	0.5	0	X - 16397	Unknown						0.005269	0.001122	3.09055e-06	0.0105	0.0159	0.508963	0.006951	0.001349	3.36408e-07	0.002075	0.002054	0.313038	0.005292	0.002227	0.017647
47804	0.142066	0.114787	0.2264	0.0802861	X - 16580	Unknown						0.005147	0.000771	4.12972e-11	-0.01812	0.01088	0.0961032	0.005416	0.000947	1.62036e-08	0.004926	0.00136	0.000335985	0.0014	0.00152	0.357169
47818	0.294682	0.128077	0.439	0.16817	X - 17328	Unknown						-1.45e-06	0.002272	0.999489	0.05339	0.03169	0.0922592	0.00279	0.002802	0.319594	-0.00592	0.003864	0.126037	0.00624	0.004443	0.160341
47820	0.3473	0.121103	0.07555	0.162351	X - 17335	Unknown						0.004563	0.000953	1.93761e-06	-0.00247	0.01337	0.85373	0.004934	0.001116	1.16278e-05	0.003654	0.001788	0.0416534	0.001221	0.001882	0.516528
47821	0.458107	0.130685	0.003083	0.249884	X - 17337	Unknown						0.004196	0.000722	8.12908e-09	-0.02406	0.01002	0.0164979	0.005423	0.000854	3.55148e-10	0.001681	0.001345	0.212376	0.003192	0.001362	0.0192406
47824	0.417539	0.12231	0.007751	0.402984	X - 17346	Unknown						0.00108	0.002055	0.599272	-0.07738	0.02864	0.00699611	0.003748	0.002506	0.135254	-0.00422	0.003631	0.245633	0.007926	0.004081	0.0523425
47872	0.547999	0.108578	7.697e-05	0.400065	X - 17340	Unknown						0.00206	0.000989	0.0376065	-0.1333	0.01385	3.75724e-21	0.003052	0.001236	0.0137837	0.000171	0.001588	0.914421	0.004468	0.00188	0.0175699
47886	0.770506	0.09856	2.882e-07	0.631341	bilirubin (E,Z or Z,E)*	Cofactors and Vitamins	Hemoglobin and Porphyrin Metabolism		5799469		HMDB00488	0.002353	0.000667	0.000438202	-0.09501	0.009231	7.43938e-24	0.002313	0.000813	0.00456874	0.002463	0.001187	0.0387186	-0.00065	0.001221	0.594802
47901	0.181943	0.119012	0.1348	0.221992	X - 11485	Unknown						-0.00172	0.002239	0.442458	-0.2955	0.03112	1.19036e-20	-0.00142	0.002742	0.605318	-0.00071	0.003867	0.854274	-0.00117	0.004319	0.787094
47905	0.540141	0.118043	0.0001234	0.445285	X - 12026	Unknown						0.003964	0.000634	5.662e-10	0.02058	0.008838	0.020043	0.004501	0.000766	6.26234e-09	0.003074	0.001113	0.00601707	0.000607	0.00119	0.609822
47909	0.527295	0.099104	0.00926	0.368723	X - 12170	Unknown						0.003651	0.001076	0.000712189	-0.1926	0.01505	3.57093e-35	0.005467	0.00138	8.18462e-05	0.000319	0.001638	0.8459	0.00496	0.002092	0.0179066
47914	0.487318	0.126544	0.0003985	0.367724	X - 12262	Unknown						0.004838	0.001541	0.0017385	-0.0268	0.0215	0.212743	0.004055	0.0018	0.0245564	0.008007	0.002964	0.0072435	-0.00596	0.002904	0.0403319
47917	0.437383	0.123562	0.0004279	0.38602	X - 12306	Unknown						-0.00104	0.001937	0.592903	-0.03111	0.027	0.249456	-0.0022	0.002371	0.353899	0.000899	0.003343	0.788221	-0.00413	0.003762	0.272153
47921	0.312359	0.123778	0.5	0.147498	X - 12410	Unknown						0.007851	0.001835	2.04806e-05	0.02452	0.02565	0.339269	0.007724	0.002221	0.000537086	0.00877	0.003235	0.00702729	-0.00303	0.003562	0.394979
47922	0.440624	0.128752	0.00766	0.245697	X - 12543	Unknown						0.003224	0.00228	0.157646	0.05326	0.03194	0.0956909	0.003746	0.00276	0.175121	0.002943	0.004098	0.473195	0.003196	0.004478	0.47546
47929	0.37311	0.116116	0.002718	0.329894	X - 12707	Unknown						0.006293	0.001239	4.37688e-07	-0.01302	0.01721	0.449491	0.006865	0.00146	3.02302e-06	0.005515	0.002329	0.0183717	0.000212	0.002295	0.926493
47936	0.462184	0.121813	0.0002579	0.435458	X - 12726	Unknown						0.002561	0.001837	0.163551	-0.04164	0.02558	0.103792	0.000764	0.002212	0.729902	0.006347	0.00328	0.0537884	-0.00618	0.003567	0.0833257
47955	0.318038	0.119946	0.06315	0.258315	X - 12906	Unknown						0.007415	0.001453	3.95334e-07	-0.01837	0.02025	0.364378	0.008819	0.001814	1.40249e-06	0.005699	0.002398	0.0179697	0.00391	0.002794	0.161894
47959	0.523851	0.118162	3.179e-05	0.523511	X - 13553	Unknown						0.007102	0.001309	7.03659e-08	-0.04012	0.01821	0.0277694	0.008241	0.001581	2.33541e-07	0.004837	0.002346	0.039906	0.003512	0.002344	0.134262
47967	0.087732	0.118885	0.4791	0.0410763	X - 13726	Unknown						0.01159	0.002415	1.78322e-06	0.1049	0.03449	0.00240645	0.01282	0.003021	2.48262e-05	0.009841	0.004223	0.0203533	0.003623	0.004748	0.445554
47971	0.439578	0.122316	0.0005015	0.455048	X - 13729	Unknown						0.005923	0.001342	1.10608e-05	0.04787	0.01853	0.00988777	0.005325	0.00162	0.00105374	0.007111	0.002393	0.00314959	-0.00027	0.002491	0.914888
47977	0.462441	0.1115	0.0003213	0.449333	X - 13844	Unknown						0.01347	0.002439	4.06856e-08	0.1269	0.03383	0.000184894	0.01419	0.002967	2.03791e-06	0.01205	0.004272	0.00503146	0.004692	0.004504	0.297686
47985	0.63161	0.133195	0.3168	0.492019	X - 15523	Unknown						0.004413	0.002042	0.0308619	0.07447	0.02798	0.00789002	0.00512	0.00277	0.0648711	0.002399	0.002355	0.308939	0.004166	0.003787	0.271487
47988	0.596632	0.115833	0.02405	0.1906	X - 16087	Unknown						0.00493	0.001556	0.00157794	-0.06173	0.02176	0.00464557	0.005986	0.001932	0.0020174	0.002009	0.00264	0.447165	0.003908	0.003024	0.196423
47992	0.298064	0.132614	0.04486	0.206402	X - 16649	Unknown						-0.00714	0.002834	0.0118948	-0.01365	0.0393	0.72853	-0.00595	0.003507	0.0899457	-0.00824	0.004729	0.082445	0.001251	0.005528	0.82097
47993	0.257863	0.12546	0.5	0	X - 17010	Unknown						-0.00022	0.001247	0.861525	0.009681	0.01762	0.582836	-0.00024	0.001533	0.878003	-0.00102	0.002154	0.636035	0.001395	0.002497	0.576354
48001	0.321803	0.117149	0.005487	0.439055	X - 17351	Unknown						0.006901	0.001571	1.22627e-05	-0.01986	0.02188	0.364025	0.006637	0.001918	0.000571778	0.007427	0.002749	0.00724043	-0.00272	0.00303	0.370354
48003	0.019565	0.112173	0.5	0.0981205	X - 17353	Unknown						-0.00147	0.002035	0.470879	0.0985	0.02875	0.0006335	-0.00122	0.002562	0.633391	-0.00219	0.003327	0.510176	-0.00203	0.003963	0.608667
48009	0.202701	0.118067	0.5	0.0109497	X - 17357	Unknown						0.002297	0.000833	0.00594181	-0.04413	0.01184	0.000203454	0.003526	0.001067	0.00099458	-0.00049	0.001264	0.697753	0.005186	0.001626	0.00145671
48011	0.0731	0.09686	0.3374	0.110003	X - 17359	Unknown						0.000416	0.000806	0.605881	-0.03765	0.01145	0.00103509	0.000905	0.001046	0.387265	-0.00046	0.001192	0.699966	0.002173	0.001581	0.169452
48013				0.158055	X - 17361	Unknown						0.003635	0.001299	0.00520798	-0.04374	0.01851	0.0183309	0.003818	0.001535	0.0130789	0.003029	0.002573	0.239979	-0.00043	0.002595	0.866913
48025	0.327813	0.132688	0.4692	0.0805366	X - 17685	Unknown						0.002581	0.002242	0.249985	0.03446	0.03144	0.273415	0.00498	0.002773	0.0729947	-0.00228	0.003781	0.546973	0.007737	0.004407	0.0794041
48047	0.04319	0.105749	0.5	0.0126903	X - 18886	Unknown						0.000614	0.001307	0.638908	-0.1284	0.01841	5.07335e-12	0.000415	0.00163	0.799018	0.000667	0.002197	0.761516	-0.00154	0.00256	0.546562
48049	0.410366	0.127974	0.003388	0.526495	X - 18935	Unknown						0.004468	0.001877	0.0174827	0.03395	0.02607	0.193131	0.001553	0.002288	0.497567	0.01098	0.003263	0.000852577	-0.00826	0.003508	0.0187067
48050	0.359174	0.126472	0.0204	0.281751	X - 18938	Unknown						0.01077	0.002285	2.77258e-06	-0.03036	0.03189	0.341267	0.008413	0.002764	0.00241604	0.01466	0.004054	0.000340923	-0.00588	0.004355	0.177254
48052	0.182956	0.120876	0.4109	0.114941	X - 17612	Unknown						0.01158	0.002276	4.41801e-07	-0.02362	0.03221	0.463626	0.009292	0.002833	0.00109919	0.01596	0.003803	3.4186e-05	-0.00779	0.004429	0.0787378
48067	0.401195	0.131266	0.01304	0.340427	X - 22764	Unknown						0.003114	0.001036	0.00271882	0.1159	0.01449	2.98275e-15	0.004264	0.00127	0.000822611	0.000628	0.001806	0.728326	0.002793	0.001993	0.161395
48080	0.349094	0.126085	0.5	0.0374633	X - 22775	Unknown						0.000845	0.001207	0.484191	-0.00591	0.01703	0.728682	0.002482	0.001453	0.0881212	-0.00204	0.002218	0.358537	0.004211	0.002397	0.0791461
48081	0.125329	0.123822	0.4505	0	X - 22776	Unknown						-0.00203	0.001432	0.156463	0.01362	0.02007	0.497694	-0.00164	0.001772	0.353804	-0.00311	0.002444	0.204569	0.000317	0.002788	0.909603
48114	0.453891	0.12316	0.002723	0.443129	1-methylguanidine	Amino Acid	Guanidino and Acetamido Metabolism	22661-87-6	10111	C02294	HMDB01522	0.004834	0.001236	9.75613e-05	-0.0616	0.01718	0.000350061	0.006349	0.001467	1.70912e-05	0.002182	0.002284	0.33989	0.004574	0.002345	0.0512482
48130	0.264606	0.120677	0.03132	0.253308	N6-succinyladenosine	Nucleotide	Purine Metabolism, Adenine containing	4542-23-8	165243		HMDB00912	0.006138	0.001198	3.5046e-07	0.02002	0.01676	0.232606	0.007517	0.001473	4.15151e-07	0.004319	0.002086	0.0391349	0.003886	0.002293	0.0903344
48149	0.348878	0.119788	0.005086	0.265562	N-acetylglucosaminylasparagine	Carbohydrate	Aminosugar Metabolism	2776-93-4	123826	C04540	HMDB00489	0.003435	0.000916	0.000185798	-0.04775	0.01269	0.000176342	0.003606	0.001111	0.00122267	0.002614	0.001639	0.111615	0.000294	0.001765	0.867668
48152	0.625254	0.099702	1.227e-07	0.489465	glucose	Carbohydrate	Glycolysis, Gluconeogenesis, and Pyruvate Metabolism	50-99-7	79025	C00031	HMDB00122	0.000606	0.000204	0.00304057	-0.01068	0.002877	0.00021523	0.000933	0.000246	0.000161093	-4e-05	0.000366	0.90908	0.000938	0.000392	0.016856
48153	0.552137	0.108087	0.003981	0.395395	mannose	Carbohydrate	Fructose, Mannose and Galactose Metabolism	3458-28-4	18950	C00159	HMDB00169	0.000921	0.000367	0.0122471	-0.02096	0.005152	5.05709e-05	0.000937	0.000435	0.0315705	0.001056	0.000685	0.123921	-6e-05	0.000702	0.92884
48182				0.24786	myristoleoylcarnitine (C14:1)*	Lipid	Fatty Acid Metabolism(Acyl Carnitine)	889848-55-9	90659872			0.005714	0.000896	2.80645e-10	0.03719	0.01252	0.00304283	0.006937	0.001089	3.3044e-10	0.0029	0.001571	0.0656702	0.003403	0.001731	0.0494422
48185	0.231961	0.122616	0.1153	0.179258	X - 22834	Unknown						0.004065	0.002068	0.0496626	0.09602	0.02923	0.00104963	0.002581	0.002618	0.324491	0.007612	0.003418	0.0265758	-0.00619	0.00407	0.128353
48187	0.229835	0.111853	0.1603	0.176261	N-acetyltaurine	Amino Acid	Methionine, Cysteine, SAM and Taurine Metabolism		159864			0.004413	0.000948	3.59403e-06	-0.00354	0.01314	0.787839	0.004744	0.001135	3.2286e-05	0.004856	0.001737	0.00545362	-0.00094	0.001828	0.607675
48195	0.104729	0.11078	0.4202	0.0405129	fructose	Carbohydrate	Fructose, Mannose and Galactose Metabolism	57-48-7	5984	C00095	HMDB00660	0.001245	0.000641	0.0522908	0.01949	0.009034	0.0311618	0.002357	0.000779	0.00256947	-0.00153	0.001153	0.185688	0.002788	0.001278	0.0292462
48255	0.283223	0.12159	0.01285	0.248991	arabonate/xylonate	Carbohydrate	Pentose Metabolism					0.004523	0.000525	2.44639e-17	0.03488	0.007322	2.14708e-06	0.005734	0.000638	2.03848e-18	0.001961	0.000892	0.0284991	0.003187	0.001005	0.00154861
48258	0.498899	0.126569	0.0003791	0.364284	1-oleoyl-GPC (18:1)	Lipid	Lysophospholipid	19420-56-5	16081932		HMDB02815	0.000343	0.000401	0.392399	0.01283	0.005579	0.021647	0.000836	0.000498	0.093665	-0.00064	0.000664	0.335066	0.001644	0.000746	0.0277549
48351	0.685795	0.114279	0.0002058	0.396744	N1-methylinosine	Nucleotide	Purine Metabolism, (Hypo)Xanthine/Inosine containing	20245-33-4	65095		HMDB02721	0.00362	0.000595	1.5882e-09	-0.04437	0.008209	7.85933e-08	0.003236	0.000747	1.67181e-05	0.004504	0.000972	4.96662e-06	-0.00098	0.001102	0.375871
48404	0.608433	0.115009	0.007096	0.256639	dimethyl sulfoxide (DMSO)	Xenobiotics	Chemical	67-68-5	679	C11143	HMDB02151	0.003554	0.001002	0.000407007	-0.00314	0.014	0.822528	0.003927	0.001242	0.00163061	0.003027	0.001708	0.07715	-0.00025	0.001899	0.895414
48407	0.355612	0.119581	0.008536	0.309592	dopamine 3-O-sulfate	Amino Acid	Tyrosine Metabolism		122136	C13690	HMDB06275	0.003242	0.0009	0.000327344	0.01334	0.01251	0.286545	0.003537	0.001132	0.00185037	0.003461	0.001463	0.0185506	0.001086	0.001719	0.527409
48408	0.140329	0.125025	0.3022	0.13653	tyramine O-sulfate	Amino Acid	Tyrosine Metabolism	30223-92-8	153005		HMDB06409	0.003155	0.001843	0.0870953	-0.09465	0.02575	0.00024835	0.001901	0.002282	0.40506	0.006809	0.003163	0.0320528	-0.00451	0.003622	0.213621
48425	0.189159	0.116815	0.1337	0.215089	phenylacetylcarnitine	Peptide	Acetylated Peptides	287108-21-8	101724840			0.007821	0.002039	0.000132157	0.02873	0.02835	0.311213	0.007818	0.002522	0.00200759	0.00842	0.003482	0.0161201	0.000247	0.003882	0.949262
48428	0.312419	0.112536	0.1061	0.195247	pyrraline	Xenobiotics	Food Component/Plant	74509-14-1	122228		HMDB33143	-0.00263	0.001465	0.0732352	0.000226	0.02037	0.991141	-0.00249	0.001804	0.167393	-0.00242	0.002473	0.329201	0.000266	0.002878	0.926249
48429	0.155131	0.09687	0.06244	0.205051	methyl-4-hydroxybenzoate sulfate	Xenobiotics	Benzoate Metabolism					0.003661	0.002996	0.22197	0.6806	0.04207	2.57687e-53	0.003726	0.003559	0.295474	0.002506	0.005551	0.651941	-0.00639	0.005849	0.274438
48433	0.070725	0.113085	0.4085	0.097769	N-formylphenylalanine	Amino Acid	Tyrosine Metabolism	13200-85-6	759256			0.000253	0.001102	0.818457	-0.02768	0.01554	0.0751095	0.000532	0.001357	0.695389	1.7e-05	0.001892	0.992854	0.001198	0.00219	0.584454
48434	0.653898	0.112576	1.371e-05	0.510536	N-acetylcitrulline	Amino Acid	Urea cycle; Arginine and Proline Metabolism	33965-42-3	656979	C15532	HMDB00856	0.005987	0.002081	0.00408106	-0.1241	0.02869	1.64201e-05	0.006244	0.002513	0.0131746	0.007165	0.003669	0.0515908	0.000549	0.003728	0.883007
48441	0.427686	0.119883	0.0007437	0.363868	4-hydroxychlorothalonil	Xenobiotics	Chemical	28343-61-5	34217			0.000378	0.000862	0.660899	0.007213	0.012	0.547739	0.000118	0.001027	0.908527	0.000826	0.00159	0.603819	-0.00079	0.001608	0.624095
48442	0.539767	0.117309	0.01094	0.306802	4-vinylguaiacol sulfate	Xenobiotics	Food Component/Plant					-0.00658	0.001946	0.000746442	-0.1176	0.02711	1.56881e-05	-0.00627	0.002266	0.00579447	-0.00713	0.003761	0.0586365	-0.00102	0.003781	0.788036
48448	0.345554	0.112197	0.0007832	0.340272	3-hydroxypyridine sulfate	Xenobiotics	Chemical	1955-23-3				0.006801	0.002248	0.00253658	-0.04396	0.03142	0.162065	0.005111	0.002704	0.0590669	0.01085	0.004071	0.00802037	-0.00209	0.004101	0.609668
48460	0.221826	0.121248	0.07082	0.326806	propyl 4-hydroxybenzoate sulfate	Xenobiotics	Benzoate Metabolism	162338-10-5				-0.00106	0.003206	0.741602	0.6859	0.04489	3.31584e-48	-0.00058	0.004114	0.888233	-0.00309	0.004753	0.516441	-0.00729	0.00625	0.243404
48490	0.31774	0.128207	0.02467	0.220991	sphingomyelin (d18:1/20:0, d16:1/22:0)*	Lipid	Sphingolipid Metabolism				HMDB12102	0.000232	0.00031	0.454216	0.02277	0.004301	1.42834e-07	0.000653	0.000371	0.0793061	-0.00067	0.000552	0.225443	0.001439	0.000587	0.0143163
48491	0.085795	0.119082	0.4247	0.0721477	sphingomyelin (d18:1/20:1, d18:2/20:0)*	Lipid	Sphingolipid Metabolism	222403-67-0				0.001163	0.000376	0.00202659	0.0819	0.005331	1.17314e-48	0.001336	0.000469	0.00449397	0.00072	0.000638	0.260253	0.000572	0.000696	0.410979
48492	0.285537	0.123653	0.5	0.0765808	behenoyl sphingomyelin (d18:1/22:0)*	Lipid	Sphingolipid Metabolism				HMDB12103	-0.00056	0.000331	0.0887466	0.02801	0.004629	1.92038e-09	8.3e-05	0.000395	0.832706	-0.00195	0.000604	0.00134197	0.002535	0.000645	8.94614e-05
48493	0.173152	0.127881	0.5	0.0380646	sphingomyelin (d18:1/22:1, d18:2/22:0, d16:1/24:1)*	Lipid	Sphingolipid Metabolism				HMDB12104	0.000411	0.000274	0.134343	0.05452	0.003855	5.00192e-42	0.000753	0.000336	0.0253291	-0.0005	0.000479	0.300726	0.001226	0.000524	0.0194845
48569	0.528855	0.116502	0.002131	0.434695	acesulfame	Xenobiotics	Food Component/Plant	55589-62-3	36573		HMDB33585	-0.00699	0.004522	0.122278	0.1663	0.0624	0.00781699	-0.00749	0.005496	0.173524	-0.00377	0.008054	0.639631	-0.00727	0.008691	0.403205
48580	0.38854	0.11268	0.07417	0.168718	2-acetamidophenol sulfate	Xenobiotics	Drug - Analgesics, Anesthetics	40712-60-5	181671			0.000983	0.001941	0.612708	-0.07778	0.02712	0.00419709	-0.00072	0.002339	0.757334	0.003277	0.003446	0.34217	-0.00529	0.003799	0.163931
48674	0.22035	0.127227	0.09531	0.238283	umbelliferone sulfate	Xenobiotics	Food Component/Plant	69526-88-1	129659			-0.00338	0.002362	0.153027	-0.1352	0.03311	4.75316e-05	-0.00489	0.002783	0.0791046	-0.0004	0.004452	0.927923	-0.0045	0.004604	0.328755
48693	0.397149	0.122624	0.1002	0.227213	3-acetylphenol sulfate	Xenobiotics	Chemical					-0.00044	0.001583	0.783004	-0.05203	0.02221	0.0193137	0.000493	0.001923	0.797622	-0.00224	0.002837	0.431167	0.001306	0.003112	0.674938
48698	0.453481	0.115965	0.5	0.0520046	6-hydroxyindole sulfate	Xenobiotics	Chemical					0.001168	0.000978	0.232626	-0.00687	0.01377	0.618178	0.001002	0.001218	0.411221	0.001365	0.00168	0.417021	7.2e-05	0.001891	0.96982
48715	0.100795	0.124012	0.5	0.066826	eugenol sulfate	Xenobiotics	Food Component/Plant	95480-60-7	180632			0.004653	0.002493	0.0622617	-0.08033	0.03506	0.0221303	0.0021	0.003036	0.489345	0.01128	0.004375	0.010301	-0.00809	0.004954	0.102809
48757	0.548482	0.112492	0.004891	0.314787	N-acetylkynurenine (2)	Amino Acid	Tryptophan Metabolism					0.002188	0.001676	0.192182	-0.2802	0.02321	1.04397e-31	0.002358	0.001963	0.230195	0.004505	0.003138	0.151987	0.00077	0.003119	0.805172
48762	0.24019	0.129409	0.1044	0.103859	1,2,3-benzenetriol sulfate (2)	Xenobiotics	Chemical					0.001985	0.002959	0.502339	-0.01448	0.04148	0.727087	0.005776	0.003651	0.114099	-0.00456	0.005034	0.365941	0.01231	0.005821	0.0345843
48763	0.247823	0.128482	0.4774	0.0775674	3-methoxycatechol sulfate (1)	Xenobiotics	Benzoate Metabolism					0.002488	0.002487	0.31737	-0.08324	0.03495	0.017383	0.006888	0.003054	0.0244559	-0.00623	0.004255	0.143756	0.01243	0.0049	0.0113015
48772	0.381805	0.122529	0.001656	0.329784	X - 19434	Unknown						0.006752	0.002427	0.00548559	-0.2016	0.03382	3.3042e-09	0.008579	0.002892	0.00309467	0.003345	0.004475	0.455201	-0.00073	0.004497	0.871848
48773	0.212467	0.136736	0.5	0	X - 23159	Unknown						0.008795	0.001869	2.87489e-06	0.0195	0.02623	0.457374	0.007877	0.002346	0.000826437	0.01072	0.003057	0.000511435	-0.00252	0.003648	0.489539
48774	0.138488	0.121637	0.4208	0.109332	X - 23160	Unknown						0.001401	0.001978	0.478825	-0.00409	0.02801	0.883975	0.002974	0.002384	0.21262	-0.00165	0.003602	0.647139	0.003817	0.003845	0.321057
48782	0.380144	0.118483	0.1201	0.134538	C-glycosyltryptophan	Amino Acid	Tryptophan Metabolism	180509-18-6	10981970			0.003557	0.000443	2.43825e-15	0.02808	0.006172	5.93271e-06	0.003657	0.000556	8.74194e-11	0.003302	0.000719	6.22203e-06	0.000129	0.000862	0.881074
48841	0.288507	0.121747	0.1619	0.0849006	p-cresol-glucuronide*	Amino Acid	Tyrosine Metabolism	17680-99-8	154035		HMDB11686	0.01119	0.002284	1.11202e-06	0.1747	0.03204	6.06672e-08	0.008028	0.002773	0.00391308	0.01884	0.004024	3.96064e-06	-0.01031	0.004404	0.0194154
48885	0.195885	0.110054	0.07237	0.200415	arabitol/xylitol	Carbohydrate	Pentose Metabolism		6912	C01904		0.002892	0.000439	7.20833e-11	-0.02149	0.006158	0.000501244	0.003488	0.000549	3.43754e-10	0.001531	0.000721	0.0342616	0.001793	0.000832	0.0313528
48892	0.583755	0.149447	0.5	0.299009	X - 23196	Unknown						0.004997	0.001231	5.29199e-05	-0.03205	0.01706	0.0606162	0.003698	0.00149	0.013285	0.008071	0.002194	0.00027262	-0.00352	0.002401	0.142867
48989	0.094045	0.113533	0.5	0	X - 23291	Unknown						-0.00474	0.002216	0.0325104	-0.1504	0.03161	2.20218e-06	-0.00556	0.002581	0.0314987	-0.00352	0.004382	0.422675	-0.00076	0.004411	0.862545
48990	0.451378	0.118477	8.705e-05	0.446989	pyruvate	Carbohydrate	Glycolysis, Gluconeogenesis, and Pyruvate Metabolism	127-17-3	1060	C00022	HMDB00243	-0.00062	0.000385	0.10694	-0.01942	0.00533	0.000281305	-0.0003	0.000477	0.529465	-0.00126	0.00064	0.0505133	0.001262	0.000727	0.082681
48992	0.654559	0.11843	1.022e-05	0.489209	X - 23293	Unknown						0.00322	0.001125	0.00429449	0.06626	0.01544	1.91981e-05	0.003826	0.001457	0.00877066	0.001917	0.001661	0.249302	0.002853	0.002099	0.174294
48993	0.243834	0.119432	0.2725	0.181516	X - 23294	Unknown						-0.00362	0.002586	0.162279	0.000894	0.0365	0.98047	-0.00521	0.003182	0.102067	0.000238	0.004595	0.958792	-0.0046	0.005051	0.362855
48994	0.231214	0.130887	0.5	0.151191	X - 23295	Unknown						-0.00073	0.001329	0.584999	0.1018	0.01836	3.65063e-08	-0.00155	0.001652	0.347866	0.000868	0.002207	0.694424	-0.00215	0.002571	0.402352
48996	0.235751	0.137859	0.164	0.110598	X - 23297	Unknown						0.002623	0.001726	0.12885	0.02461	0.02397	0.304831	0.003987	0.002185	0.0685043	-0.00047	0.002714	0.863638	0.004269	0.003388	0.20794
48997	0.505723	0.110475	0.5	0	isoeugenol sulfate	Xenobiotics	Food Component/Plant					-0.00474	0.001994	0.0176338	-0.06651	0.02818	0.0184196	-0.00587	0.002308	0.0111718	-0.00091	0.00394	0.81822	-0.00445	0.003975	0.262804
49228	0.699441	0.110119	0.009642	0.396808	X - 23369	Unknown						0.000196	0.001048	0.851447	-0.0864	0.01441	2.72723e-09	0.000502	0.001301	0.699779	-0.00059	0.001766	0.738234	0.001138	0.001998	0.569205
49459	0.217262	0.123843	0.5	0.0158037	X - 23583	Unknown						0.002125	0.002123	0.316964	-0.05663	0.02976	0.0572988	0.00148	0.002616	0.57181	0.003423	0.003678	0.352594	-0.00023	0.004227	0.955976
49461	0.303346	0.131867	0.5	0	X - 23585	Unknown						0.002361	0.001301	0.06992	0.03236	0.01848	0.0802657	0.002326	0.001671	0.164164	0.002843	0.002048	0.165845	0.000249	0.002497	0.920534
49463	0.321858	0.125234	0.01121	0.233756	X - 23587	Unknown						0.004673	0.001657	0.00488951	-0.06957	0.02332	0.00291278	0.004408	0.002113	0.0373202	0.005291	0.002568	0.0400463	-0.00117	0.003266	0.719791
49469	0.195482	0.116852	0.09028	0.207839	X - 23593	Unknown						0.003392	0.000427	5.17199e-15	-0.00952	0.005955	0.110027	0.003952	0.000528	2.04265e-13	0.002409	0.000729	0.00105305	0.001696	0.000839	0.0435741
49512	0.250124	0.114134	0.2666	0.16178	X - 23636	Unknown						-7e-05	0.000445	0.872617	-0.00207	0.006201	0.738515	0.000543	0.000525	0.30097	-0.00146	0.000847	0.0853129	0.001711	0.000884	0.0531291
49513	0.413465	0.11813	0.0011	0.439418	X - 23637	Unknown						0.000504	0.000497	0.310734	-0.00756	0.006989	0.279615	0.001256	0.000611	0.0403778	-0.00101	0.000882	0.251445	0.002361	0.000997	0.0180512
49515	0.687493	0.112591	8.109e-08	0.613214	X - 23639	Unknown						0.003062	0.000784	9.95872e-05	0.01052	0.01086	0.332775	0.00253	0.000969	0.00920444	0.003794	0.001317	0.00419715	-0.00057	0.001419	0.686262
49517	0.427472	0.122424	0.0006851	0.321444	X - 23641	Unknown						-0.00138	0.00198	0.485718	-0.3105	0.0274	2.53529e-28	-0.00332	0.002503	0.184493	0.002837	0.003139	0.366778	-0.00541	0.003742	0.148161
49521	0.312679	0.120087	0.009574	0.291101	X - 23644	Unknown						0.002391	0.001994	0.230834	-0.05113	0.02785	0.0666358	0.001676	0.002463	0.496495	0.003316	0.003444	0.336402	-0.00169	0.003936	0.667397
49525	0.660128	0.107947	0.5	0.21215	X - 23648	Unknown						0.002753	0.001541	0.0743543	0.003654	0.02138	0.864312	0.004823	0.00187	0.0100863	-0.00105	0.002722	0.699125	0.005251	0.003006	0.0808521
49529	0.204219	0.128372	0.2253	0.136092	X - 23652	Unknown						0.00291	0.001318	0.0274276	-0.07579	0.01854	4.65322e-05	0.004616	0.001616	0.00440851	-0.00031	0.00233	0.893245	0.00538	0.002584	0.0375382
49532	0.512611	0.124318	0.0003127	0.384563	X - 23655	Unknown						0.004761	0.001979	0.0163055	-0.01309	0.02754	0.634576	0.003951	0.002411	0.101765	0.00714	0.003457	0.0395876	-0.00158	0.00376	0.674224
49536	0.261588	0.122686	0.05772	0.259658	X - 23659	Unknown						0.006916	0.00127	6.32438e-08	-0.02816	0.01771	0.112026	0.007967	0.001525	2.23967e-07	0.005013	0.0023	0.0299034	0.002916	0.002427	0.229824
49539	0.204508	0.118371	0.08526	0.213573	X - 23662	Unknown						-0.00134	0.002258	0.551859	-0.1465	0.03168	4.17281e-06	0.002603	0.002564	0.310171	-0.0103	0.004521	0.02332	0.009002	0.004321	0.0373913
49542	0.302225	0.122456	0.0462	0.286054	X - 23665	Unknown						0.00553	0.00149	0.000216874	-0.09996	0.02082	1.77977e-06	0.007114	0.001874	0.000158634	0.00302	0.00243	0.214714	0.003911	0.00283	0.167238
49543	0.245171	0.119549	0.0468	0.207671	X - 23666	Unknown						0.003445	0.001535	0.0250093	-0.04542	0.0216	0.0356357	0.00554	0.001829	0.00252848	0.000136	0.002834	0.961777	0.006889	0.002778	0.0132373
49546	0.43049	0.117907	0.1111	0.242471	X - 23669	Unknown						-0.00222	0.001653	0.179681	-0.1536	0.02317	5.10729e-11	0.000871	0.001881	0.643462	-0.00593	0.003248	0.0684555	0.00842	0.003071	0.00618031
49555	0.35228	0.11866	0.003988	0.274587	X - 23678	Unknown						0.005847	0.001333	1.26286e-05	-0.00894	0.01876	0.63374	0.006074	0.001642	0.000234226	0.004555	0.002279	0.0463734	0.002378	0.002609	0.36223
49557	0.352944	0.134257	0.04196	0.133719	X - 23680	Unknown						0.004226	0.000866	1.20451e-06	-0.03585	0.01203	0.00294786	0.00547	0.001064	3.43988e-07	0.001637	0.001474	0.267475	0.002617	0.001634	0.109405
49592	0.406957	0.113738	0.001635	0.27164	X - 11315	Unknown						0.003208	0.00089	0.000327457	0.01444	0.01245	0.246676	0.003058	0.001065	0.00420545	0.003895	0.001649	0.0186849	0.000203	0.001625	0.900737
49617	0.619361	0.107899	0.445	0.172596	1-lignoceroyl-GPC (24:0)	Lipid	Lysophospholipid	325171-59-3			HMDB10405	0.00044	0.000567	0.438448	0.01787	0.007936	0.0245366	0.000737	0.000684	0.281154	-0.00016	0.00102	0.879151	0.000961	0.001087	0.376874
49637	0.351285	0.110491	7.435e-05	0.342546	X - 23739	Unknown						0.001962	0.000455	1.7765e-05	-0.02808	0.006318	9.63895e-06	0.002201	0.000559	8.86385e-05	0.001691	0.000793	0.0336683	0.000837	0.000884	0.343711
49675	0.443701	0.119191	0.5	0.0946679	X - 23776	Unknown						0.009245	0.002253	4.39518e-05	0.04495	0.03189	0.158946	0.007606	0.002795	0.00663621	0.01231	0.003788	0.00127411	-0.00435	0.004498	0.333891
49679	0.255707	0.120951	0.04407	0.232813	X - 23780	Unknown						9.3e-05	0.001814	0.959204	-0.0694	0.02528	0.00614226	0.001909	0.00227	0.400663	-0.00261	0.003	0.385105	0.003788	0.003541	0.284898
4968	0.29223	0.12478	0.2422	0.102439	alpha-ketobutyrate	Amino Acid	Methionine, Cysteine, SAM and Taurine Metabolism	600-18-0	58	C00109	HMDB00005	0.000191	0.000732	0.794142	-0.01916	0.01024	0.0615552	0.000854	0.000873	0.328502	-0.00153	0.001324	0.247481	0.001673	0.001437	0.244666
49681	0.270374	0.133138	0.09212	0.280439	X - 23782	Unknown						0.003852	0.000808	2.10215e-06	0.08456	0.01129	1.34655e-13	0.004189	0.000986	2.41058e-05	0.003	0.001411	0.0341493	0.000509	0.001551	0.742829
49688	0.362174	0.119531	0.001172	0.276598	X - 23787	Unknown						-0.01084	0.001924	2.22918e-08	-0.09619	0.027	0.000382396	-0.00832	0.002297	0.000310719	-0.01727	0.003506	1.28593e-06	0.006551	0.003685	0.075697
49704	0.369094	0.115772	0.001022	0.352814	X - 23314	Unknown						0.01236	0.002439	4.70685e-07	-0.06053	0.03381	0.0736697	0.01469	0.003015	1.33273e-06	0.006957	0.004097	0.0903061	0.008113	0.004619	0.0792446
5086	0.664561	0.12984	0.002218	0.362485	dimethylglycine	Amino Acid	Glycine, Serine and Threonine Metabolism	1118-68-9	673	C01026	HMDB00092	0.003029	0.000559	7.29495e-08	-0.05343	0.007648	4.85455e-12	0.003291	0.000629	2.1062e-07	0.002313	0.001115	0.0386229	0.001447	0.000967	0.134612
512	0.464844	0.113547	4.075e-06	0.538878	asparagine	Amino Acid	Alanine and Aspartate Metabolism	70-47-3	6267	C00152	HMDB00168	-0.00047	0.000245	0.0556095	-0.01704	0.003413	6.80317e-07	-0.0007	0.000301	0.0210355	1.6e-05	0.000423	0.969158	-0.00054	0.00046	0.24485
513	0.278697	0.124327	0.03471	0.341428	creatinine	Amino Acid	Creatine Metabolism	60-27-5	588	C00791	HMDB00562	0.000498	0.00026	0.0560716	-0.06912	0.003637	1.42565e-70	0.000672	0.000325	0.0390798	0.000256	0.00042	0.542453	0.000289	0.000473	0.541494
514	0.481842	0.11264	0.003517	0.284	cytidine	Nucleotide	Pyrimidine Metabolism, Cytidine containing	65-46-3	6175	C00475	HMDB00089	0.002753	0.00116	0.0177812	-0.01011	0.01617	0.531973	0.003013	0.00144	0.0366454	0.001683	0.001959	0.39069	0.00055	0.002238	0.805754
52025	0.30796	0.115523	0.009353	0.318812	X - 23997	Unknown						0.004877	0.001644	0.00307512	0.0741	0.02281	0.00119615	0.002242	0.001964	0.253944	0.0109	0.00296	0.000267066	-0.00893	0.003171	0.00493651
52135				0.422882	X - 24106	Unknown						0.002076	0.000544	0.000142868	0.03508	0.007611	4.50566e-06	0.002374	0.000657	0.000324749	0.001295	0.000979	0.186712	0.00116	0.001065	0.276123
52234	0.005864	0.10775	0.5	0	glycosyl-N-stearoyl-sphingosine (d18:1/18:0)	Lipid	Ceramides					0.002993	0.000597	6.37888e-07	0.05805	0.008347	5.9872e-12	0.00321	0.000706	6.47356e-06	0.002342	0.001115	0.0364382	0.001149	0.001143	0.314784
52281	0.402674	0.121339	0.1136	0.0993631	2-hydroxybutyrate/2-hydroxyisobutyrate	Amino Acid	Glutathione Metabolism					0.00125	0.000652	0.0555343	-0.02959	0.009222	0.00136887	0.002012	0.000781	0.0101335	-0.00053	0.001185	0.65398	0.00294	0.001262	0.0199498
52285	0.353295	0.121988	0.5	0.130117	oleate/vaccenate (18:1)	Lipid	Long Chain Fatty Acid					0.002727	0.000633	1.80733e-05	0.09105	0.00887	9.99879e-24	0.003074	0.000752	4.86291e-05	0.002197	0.001166	0.0604609	0.000932	0.001244	0.454018
52286	0.334493	0.120263	0.5	0.15983	X - 24243	Unknown						-0.00042	0.001063	0.695253	-0.1021	0.01488	1.16522e-11	-0.00096	0.001288	0.456575	0.001196	0.001895	0.528504	0.000111	0.002106	0.958122
52297	0.545556	0.143677	0.5	0.387643	X - 24293	Unknown						0.004419	0.003043	0.146797	-0.3645	0.04207	1.49748e-17	0.003669	0.003661	0.316537	0.005437	0.005473	0.321181	0.002813	0.005747	0.624598
52332	0.591731	0.118501	6.316e-06	0.492906	X - 24272	Unknown						0.007387	0.002501	0.00320452	-0.08054	0.03466	0.0202992	0.008348	0.002969	0.00505466	0.006817	0.004649	0.143337	0.002998	0.004814	0.533458
52340	0.391568	0.123034	0.005222	0.368057	N-carbamoylalanine	Amino Acid	Alanine and Aspartate Metabolism	77340-50-2	426409			0.007238	0.001504	1.70312e-06	0.006566	0.02087	0.753123	0.007886	0.001857	2.4186e-05	0.006031	0.002548	0.0184908	0.000756	0.002894	0.793933
52431	0.083689	0.112239	0.5	0.0679232	1-palmitoleoylglycerol (16:1)*	Lipid	Monoacylglycerol				HMDB11565	0.00013	0.00156	0.933428	0.06339	0.02209	0.00418065	0.000912	0.001873	0.626305	-0.00148	0.002901	0.609822	0.003675	0.003089	0.234355
52433	0.531827	0.128185	0.0005049	0.459611	sphingomyelin (d17:1/16:0, d18:1/15:0, d16:1/17:0)*	Lipid	Sphingolipid Metabolism	121999-58-4				0.001159	0.000404	0.00422271	0.03951	0.005634	3.91674e-12	0.001643	0.000502	0.00110123	0.000159	0.00067	0.812741	0.002319	0.000727	0.00144323
52434				0.448125	palmitoyl dihydrosphingomyelin (d18:0/16:0)*	Lipid	Sphingolipid Metabolism		9939965			0.001117	0.000364	0.00218955	0.02873	0.005029	1.40744e-08	0.001111	0.000446	0.0128407	0.001108	0.000626	0.07772	-0.00013	0.000672	0.845696
52435	0.45797	0.124774	0.5	0.155654	sphingomyelin (d18:2/23:0, d18:1/23:1, d17:1/24:1)*	Lipid	Sphingolipid Metabolism					0.001422	0.000455	0.0018213	0.1189	0.006406	1.36294e-67	0.002725	0.000539	5.45284e-07	-0.0015	0.000831	0.071952	0.004357	0.000872	6.46409e-07
52436	0.371639	0.125057	0.06928	0.2376	tricosanoyl sphingomyelin (d18:1/23:0)*	Lipid	Sphingolipid Metabolism				HMDB12105	4.9e-05	0.000401	0.902208	0.07518	0.005598	2.35032e-38	0.001038	0.000478	0.0300165	-0.00233	0.000726	0.00145993	0.003835	0.000755	4.25016e-07
52437	0.433067	0.123623	0.1001	0.225261	sphingomyelin (d18:2/24:1, d18:1/24:2)*	Lipid	Sphingolipid Metabolism					0.001292	0.000313	4.05901e-05	0.06336	0.004389	1.26353e-43	0.001452	0.000369	9.31027e-05	0.000836	0.000576	0.147787	0.000369	0.000588	0.530831
52438	0.417743	0.119309	0.006073	0.208075	1-stearoyl-2-oleoyl-GPC (18:0/18:1)	Lipid	Phosphatidylcholine (PC)	56421-10-4			HMDB08038	-0.00045	0.000452	0.318088	0.01812	0.006325	0.00424763	0.000442	0.000548	0.419372	-0.00231	0.000792	0.0037838	0.003167	0.000883	0.000347179
52446	0.594975	0.113691	7.326e-07	0.629794	1-stearoyl-2-linoleoyl-GPE (18:0/18:2)*	Lipid	Phosphatidylethanolamine (PE)		9546749		HMDB08994	-0.00132	0.000801	0.0984869	0.04878	0.011	1.01242e-05	-0.00053	0.000949	0.57378	-0.00318	0.001492	0.0336492	0.003075	0.001438	0.0325963
52447	0.609464	0.110609	7.216e-06	0.552455	1-stearoyl-2-arachidonoyl-GPE (18:0/20:4)	Lipid	Phosphatidylethanolamine (PE)		5289133		HMDB09003	-0.00147	0.000671	0.0286151	0.06814	0.009266	3.62581e-13	-0.00085	0.000791	0.285298	-0.00284	0.001253	0.023903	0.002984	0.001184	0.0118394
52449	0.200565	0.128368	0.1647	0.220206	1-stearoyl-2-arachidonoyl-GPI (18:0/20:4)	Lipid	Phosphatidylinositol (PI)	383907-33-3			HMDB09815	-0.00104	0.000517	0.0455972	0.03561	0.007264	1.08017e-06	-0.00043	0.000606	0.475922	-0.00199	0.000966	0.0396763	0.00186	0.000996	0.0620625
52450	0.587236	0.112325	0.03418	0.324003	1-palmitoyl-2-linoleoyl-GPI (16:0/18:2)	Lipid	Phosphatidylinositol (PI)				HMDB09784	-0.00119	0.000773	0.123133	0.0442	0.01081	4.64107e-05	-0.00068	0.000908	0.451322	-0.00192	0.001438	0.181554	0.000868	0.00148	0.557599
52452	0.356339	0.112393	0.01322	0.258885	1-stearoyl-2-linoleoyl-GPC (18:0/18:2)*	Lipid	Phosphatidylcholine (PC)				HMDB08039	-0.00025	0.000237	0.291054	0.02947	0.003304	1.84843e-18	3.7e-05	0.000282	0.89602	-0.00087	0.000438	0.0482925	0.001076	0.000452	0.0174202
52454	0.358481	0.119332	0.5	0.111614	1-palmitoyl-2-dihomo-linolenoyl-GPC (16:0/20:3n3 or 6)*	Lipid	Phosphatidylcholine (PC)					-0.00077	0.000272	0.00457304	0.01815	0.003842	2.57807e-06	-0.0002	0.000334	0.544832	-0.00204	0.000471	1.80639e-05	0.001861	0.000524	0.000388836
52461	0.306399	0.126731	0.03405	0.21706	1-palmitoyl-2-oleoyl-GPC (16:0/18:1)	Lipid	Phosphatidylcholine (PC)	26853-31-6;26853-31-6	6436017		HMDB07972	0.000261	0.000319	0.413433	0.01177	0.004444	0.00816786	0.000574	0.000384	0.135231	-0.00041	0.000576	0.481223	0.001131	0.000601	0.0601853
52462	0.623694	0.116595	1.081e-05	0.461866	1-palmitoyl-2-arachidonoyl-GPC (16:0/20:4n6)	Lipid	Phosphatidylcholine (PC)	35418-58-7	10747814		HMDB07982	-0.00075	0.000347	0.0306513	0.01573	0.004827	0.0011486	-0.00033	0.000412	0.428008	-0.00166	0.000638	0.00974958	0.001364	0.000622	0.0284509
52464	0.642648	0.105732	2.214e-06	0.598845	1-palmitoyl-2-arachidonoyl-GPE (16:0/20:4)*	Lipid	Phosphatidylethanolamine (PE)		9546800		HMDB05323	-0.00093	0.000784	0.235575	0.06607	0.01082	1.39589e-09	-0.00055	0.000942	0.55641	-0.00166	0.001447	0.252874	0.001761	0.001396	0.207397
52465				0.622129	1-palmitoyl-2-docosahexaenoyl-GPE (16:0/22:6)*	Lipid	Phosphatidylethanolamine (PE)		9546799		HMDB05324	0.004211	0.000983	1.98549e-05	0.1226	0.01358	7.15977e-19	0.004787	0.00116	4.05019e-05	0.002989	0.00182	0.101328	0.001835	0.001768	0.299421
52466	0.72972	0.108766	3.539e-09	0.687258	1-stearoyl-2-docosahexaenoyl-GPE (18:0/22:6)*	Lipid	Phosphatidylethanolamine (PE)		9546798		HMDB05334	0.004228	0.001092	0.000114199	0.1197	0.01503	4.06232e-15	0.005715	0.001286	1.00394e-05	0.000772	0.002003	0.700016	0.00459	0.001977	0.0203705
52467	0.197145	0.127398	0.4413	0.118693	1-palmitoyl-2-arachidonoyl-GPI (16:0/20:4)*	Lipid	Phosphatidylinositol (PI)				HMDB09789	-0.00088	0.000755	0.244292	0.05626	0.01065	1.50751e-07	0.000194	0.000875	0.824392	-0.00268	0.001433	0.0619227	0.0027	0.001476	0.0675423
52468	0.261949	0.122962	0.04256	0.230553	1-stearoyl-2-linoleoyl-GPI (18:0/18:2)	Lipid	Phosphatidylinositol (PI)				HMDB09809	-0.0013	0.000592	0.0278378	0.03444	0.008266	3.32066e-05	-0.00127	0.000698	0.0692908	-0.00122	0.001116	0.274438	-0.00037	0.00113	0.742513
52470	0.340819	0.133325	0.07213	0.241788	1-palmitoyl-2-palmitoleoyl-GPC (16:0/16:1)*	Lipid	Phosphatidylcholine (PC)				HMDB07969	-0.0001	0.000771	0.893753	0.04332	0.01074	5.88241e-05	0.000631	0.000913	0.489691	-0.00177	0.001433	0.218343	0.002777	0.00144	0.0539626
52473	0.318038	0.127485	0.0205	0.249461	gamma-tocopherol/beta-tocopherol	Cofactors and Vitamins	Tocopherol Metabolism					-0.00615	0.000998	9.56016e-10	-0.00699	0.0139	0.615073	-0.00563	0.00123	5.47263e-06	-0.00762	0.001705	1.04068e-05	0.002772	0.001834	0.130764
52474	0.658032	0.118038	0.0003145	0.370001	1-(1-enyl-palmitoyl)-GPC (P-16:0)*	Lipid	Lysoplasmalogen		10917802		HMDB10407	0.001595	0.000633	0.0118612	0.01199	0.00882	0.174275	0.002158	0.000812	0.0080317	0.000576	0.00097	0.552658	0.002094	0.001171	0.0740002
52475	0.735399	0.098111	0.01668	0.320234	1-(1-enyl-stearoyl)-2-arachidonoyl-GPE (P-18:0/20:4)*	Lipid	Plasmalogen		9547058		HMDB05779	0.000436	0.00063	0.488765	0.01572	0.008765	0.0732282	0.001202	0.000747	0.108167	-0.00123	0.00115	0.284783	0.003402	0.00119	0.00431748
52477	0.482383	0.13915	0.007351	0.274446	1-(1-enyl-palmitoyl)-2-oleoyl-GPE (P-16:0/18:1)*	Lipid	Plasmalogen				HMDB11342	-0.00088	0.000681	0.197414	0.00362	0.009435	0.701289	-3.05e-07	0.000819	0.999703	-0.00238	0.001225	0.0526018	0.003126	0.001318	0.0178562
52478	0.482953	0.120353	5.243e-05	0.364362	1-(1-enyl-palmitoyl)-2-oleoyl-GPC (P-16:0/18:1)*	Lipid	Plasmalogen					0.002124	0.000481	1.1196e-05	0.05737	0.006763	6.58312e-17	0.001885	0.0006	0.00176053	0.002892	0.000776	0.000221843	-0.00065	0.000839	0.438012
52483	0.412502	0.110985	1.658e-05	0.414215	X - 24295	Unknown						-0.00285	0.000636	8.52086e-06	-0.09664	0.008819	1.1573e-26	-0.00275	0.0008	0.00061414	-0.00331	0.001043	0.00165932	0.000401	0.001206	0.739289
52495	0.442396	0.129294	0.5	0.103171	sphingomyelin (d18:1/21:0, d17:1/22:0, d16:1/23:0)*	Lipid	Sphingolipid Metabolism					0.000818	0.000522	0.117731	0.08418	0.007315	4.19795e-29	0.002154	0.00061	0.000445189	-0.00207	0.000981	0.0356282	0.004903	0.000992	8.56026e-07
52501	0.361097	0.114226	0.0003253	0.343727	X - 24306	Unknown						-0.0001	0.000654	0.876874	-0.012	0.009229	0.193608	0.00035	0.000805	0.663771	-0.00101	0.00114	0.375791	0.000647	0.001325	0.625305
52502	0.566712	0.113093	8.327e-08	0.581772	X - 24307	Unknown						-0.00024	0.000691	0.732794	-0.01682	0.009759	0.0850653	0.000535	0.000862	0.53457	-0.00194	0.001181	0.100849	0.001964	0.001401	0.161087
52504	0.364092	0.122883	0.006671	0.284816	X - 24309	Unknown						-0.00083	0.001074	0.440923	0.02411	0.01489	0.105823	-0.00098	0.001317	0.455024	-0.00042	0.001862	0.819876	0.000428	0.002023	0.832432
52524	0.910915	0.083833	7.061e-14	0.832656	X - 24328	Unknown						-0.00698	0.001148	1.60985e-09	-0.3008	0.01584	2.21768e-70	-0.00966	0.001454	5.46272e-11	-0.0019	0.001794	0.290476	-0.00797	0.002005	7.36331e-05
52525	0.593232	0.096025	0.5	0.221129	X - 24329	Unknown						0.004102	0.000965	2.30315e-05	-0.0289	0.01351	0.0325802	0.00477	0.001221	0.000101496	0.003111	0.00155	0.0455353	0.002074	0.00188	0.270179
52533	0.279355	0.116206	0.01291	0.328435	X - 24337	Unknown						0.000999	0.001097	0.362503	-0.07455	0.01528	1.20569e-06	0.002689	0.001375	0.0508234	-0.00237	0.001803	0.188782	0.004549	0.002098	0.030269
52544	0.549146	0.115804	2.522e-06	0.588301	X - 24348	Unknown						-0.00802	0.002201	0.000278884	-0.2716	0.03063	2.71999e-18	-0.01137	0.002644	1.92409e-05	-0.00247	0.003921	0.529948	-0.00821	0.004014	0.0410586
52548	0.224123	0.114326	0.2045	0.105145	X - 24352	Unknown						0.002123	0.001574	0.177768	-0.02808	0.02215	0.205007	0.000911	0.0019	0.631643	0.004966	0.002886	0.0861557	-0.00234	0.003132	0.45537
52602	0.400907	0.104948	1.184e-05	0.442494	2'-deoxyuridine	Nucleotide	Pyrimidine Metabolism, Uracil containing	951-78-0	13712	C00526	HMDB00012	7.9e-05	0.000637	0.901756	-0.06844	0.008837	2.0638e-14	0.000821	0.000781	0.293331	-0.00065	0.001095	0.553942	0.001758	0.001228	0.152532
52603	0.292787	0.112873	0.007937	0.262866	1,2-dilinoleoyl-GPC (18:2/18:2)	Lipid	Phosphatidylcholine (PC)	998-06-1	5288075		HMDB08138	-0.00156	0.000519	0.00268014	-0.00173	0.007213	0.810943	-0.00155	0.000645	0.0166534	-0.00176	0.000861	0.0418076	0.000636	0.000998	0.524381
52604	0.359174	0.107512	0.2285	0.201114	N-palmitoyl-sphinganine (d18:0/16:0)	Lipid	Sphingolipid Metabolism	5966-29-0	5283572		HMDB11760	0.001907	0.000739	0.00996315	0.01172	0.01032	0.256181	0.002987	0.000908	0.00104617	6.3e-05	0.001274	0.960396	0.003761	0.001415	0.00796099
52610	0.374975	0.123424	0.001742	0.317816	1-palmitoyl-2-docosahexaenoyl-GPC (16:0/22:6)	Lipid	Phosphatidylcholine (PC)	59403-54-2	6441886		HMDB07991	0.002615	0.000471	3.57287e-08	0.03091	0.006578	2.92828e-06	0.002563	0.000585	1.32251e-05	0.002839	0.000791	0.000377437	-0.00067	0.000868	0.440091
52611	0.533566	0.119193	1.444e-05	0.520462	1-stearoyl-2-docosahexaenoyl-GPC (18:0/22:6)	Lipid	Phosphatidylcholine (PC)	59403-52-0			HMDB08057	0.003809	0.000638	3.20824e-09	0.04832	0.008892	6.67705e-08	0.003846	0.00078	9.80588e-07	0.003784	0.001119	0.00079708	-0.00026	0.001159	0.821491
52614	0.15331	0.119759	0.2037	0.170956	1-(1-enyl-stearoyl)-2-oleoyl-GPE (P-18:0/18:1)	Lipid	Plasmalogen	144371-68-6			HMDB11375	0.000419	0.000794	0.597587	0.005589	0.01115	0.616233	0.001344	0.000992	0.176095	-0.0015	0.001291	0.245463	0.004325	0.001553	0.0054228
52615	0.310689	0.138501	0.07147	0.214208	sphingomyelin (d18:1/17:0, d17:1/18:0, d19:1/16:0)	Lipid	Sphingolipid Metabolism	121999-64-2				0.002071	0.000396	2.06587e-07	0.04411	0.005554	4.62069e-15	0.002691	0.000493	6.59236e-08	0.000849	0.000665	0.202544	0.001778	0.000745	0.0170421
52616	0.172176	0.12688	0.2024	0.160479	1-palmitoyl-2-stearoyl-GPC (16:0/18:0)	Lipid	Phosphatidylcholine (PC)	59403-51-9			HMDB07970	0.00037	0.00047	0.431218	-0.02226	0.006603	0.000774358	0.000283	0.000598	0.636779	0.000406	0.000719	0.572751	0.00039	0.000927	0.674126
52623	0.305075	0.12666	0.01322	0.252836	1-stearoyl-2-oleoyl-GPG (18:0/18:1)	Lipid	Phosphatidylglycerol (PG)	322647-48-3				0.003093	0.000628	9.85163e-07	0.06651	0.008759	6.32603e-14	0.00349	0.000762	5.32132e-06	0.002532	0.001123	0.0247222	0.000921	0.001198	0.44226
52633	0.493403	0.135274	0.002985	0.251077	palmitoyl-linoleoyl-glycerol (16:0/18:2) [1]*	Lipid	Diacylglycerol		9543695		HMDB07103	-0.00255	0.001624	0.117208	-0.1089	0.02265	1.727e-06	-0.00145	0.002051	0.481227	-0.00484	0.002642	0.067624	0.00287	0.003122	0.358082
52634	0.342628	0.121636	0.4945	0.126568	palmitoyl-linoleoyl-glycerol (16:0/18:2) [2]*	Lipid	Diacylglycerol				HMDB07103	-0.0013	0.00144	0.367355	-0.05698	0.02018	0.00482632	0.000184	0.00181	0.919126	-0.00477	0.002359	0.0440449	0.00564	0.0028	0.0441426
52636	0.090179	0.113403	0.3578	0.0863248	X - 24422	Unknown						0.00492	0.001392	0.000426868	-0.0258	0.01954	0.18689	0.005914	0.001661	0.000393015	0.002145	0.002575	0.405262	0.003175	0.00273	0.245057
52640	0.496843	0.116224	1.125e-05	0.509216	X - 24411	Unknown						0.00542	0.001653	0.00107552	-0.1039	0.02287	6.17156e-06	0.006557	0.002018	0.00120407	0.001959	0.00286	0.493804	0.003659	0.003171	0.248793
52647	0.613272	0.116143	5.728e-06	0.591298	X - 24418	Unknown						0.008672	0.00152	1.48217e-08	0.1154	0.02109	5.45255e-08	0.009712	0.001848	1.89871e-07	0.006355	0.002666	0.0176223	0.003601	0.002786	0.196354
52655	0.341602	0.122889	0.1201	0.165309	X - 24425	Unknown						0.004048	0.001289	0.00173985	0.02873	0.01809	0.112573	0.004869	0.001605	0.00249293	0.003478	0.002144	0.105753	0.002104	0.002472	0.394895
52665	0.260135	0.115033	0.1215	0.180329	X - 24435	Unknown						-0.00301	0.003695	0.416003	-0.02559	0.05262	0.626807	-0.00029	0.00442	0.948444	-0.00752	0.006729	0.264622	0.004341	0.0058	0.454349
52669	0.336711	0.122878	0.1726	0.204621	1-palmitoyl-2-oleoyl-GPI (16:0/18:1)*	Lipid	Phosphatidylinositol (PI)				HMDB09783	-0.00221	0.000857	0.0101672	0.02728	0.01205	0.0237661	-0.00194	0.000999	0.0519653	-0.00206	0.001626	0.20677	0.000304	0.001645	0.853198
52673	0.595432	0.112399	0.001479	0.368639	1-(1-enyl-palmitoyl)-2-arachidonoyl-GPE (P-16:0/20:4)*	Lipid	Plasmalogen				HMDB11352	0.000351	0.000615	0.567929	-0.00919	0.008503	0.280029	0.001041	0.000738	0.158966	-0.00108	0.001096	0.326757	0.002887	0.001169	0.0136295
52677	0.345065	0.116032	0.0004179	0.390141	1-(1-enyl-palmitoyl)-2-linoleoyl-GPE (P-16:0/18:2)*	Lipid	Plasmalogen				HMDB11343	0.000529	0.000677	0.434582	-0.00347	0.00939	0.711968	0.000585	0.000834	0.483286	0.000321	0.001157	0.781554	0.001454	0.001299	0.263141
52682	0.517867	0.117627	1.335e-05	0.439445	1-(1-enyl-palmitoyl)-2-linoleoyl-GPC (P-16:0/18:2)*	Lipid	Plasmalogen				HMDB11211	0.00023	0.000464	0.620121	0.01654	0.006482	0.0108504	0.000262	0.000573	0.64783	0.000123	0.000781	0.875308	0.000471	0.000864	0.585957
52689	0.703157	0.117717	2.335e-06	0.519804	1-(1-enyl-palmitoyl)-2-arachidonoyl-GPC (P-16:0/20:4)*	Lipid	Plasmalogen				HMDB11220	-6e-05	0.00049	0.900731	-0.00975	0.006789	0.151063	0.000575	0.000597	0.335595	-0.00115	0.00086	0.18106	0.001941	0.000887	0.0286949
52690	0.170246	0.121227	0.1701	0.123333	1-linoleoyl-GPA (18:2)*	Lipid	Lysophospholipid				HMDB07856	0.000216	0.001291	0.867153	0.1276	0.01813	3.34807e-12	0.001295	0.001584	0.413854	-0.00221	0.002199	0.315255	0.004423	0.002507	0.0779605
52697	0.21329	0.120154	0.2841	0.0934935	1-oleoyl-2-docosahexaenoyl-GPC (18:1/22:6)*	Lipid	Phosphatidylcholine (PC)				HMDB08123	0.002305	0.000475	1.3771e-06	0.06004	0.006656	7.26254e-19	0.001941	0.000569	0.00067287	0.003203	0.000864	0.000243186	-0.00165	0.000902	0.067614
527	0.497368	0.112717	1.939e-06	0.5	lactate	Carbohydrate	Glycolysis, Gluconeogenesis, and Pyruvate Metabolism	79-33-4	612	C00186	HMDB00190	-0.00029	0.000478	0.549154	-0.03585	0.006594	6.62452e-08	0.000154	0.0006	0.797343	-0.00129	0.000772	0.095939	0.002123	0.0009	0.0184555
52710	0.16336	0.119917	0.5	0	1-linoleoyl-2-arachidonoyl-GPC (18:2/20:4n6)*	Lipid	Phosphatidylcholine (PC)				HMDB08147	-0.00178	0.000391	6.157e-06	0.01604	0.005588	0.00417978	-0.00125	0.000486	0.010156	-0.00279	0.000674	4.35636e-05	0.001683	0.000771	0.0292703
52713	0.372209	0.118382	0.0008238	0.35967	1-(1-enyl-palmitoyl)-2-palmitoleoyl-GPC (P-16:0/16:1)*	Lipid	Plasmalogen				HMDB11207	0.001967	0.000529	0.000208148	0.06753	0.007405	3.18475e-19	0.00183	0.000644	0.00457848	0.002279	0.000912	0.0128875	-0.00022	0.000933	0.817478
52716	0.474974	0.120384	0.0007884	0.390781	1-(1-enyl-palmitoyl)-2-palmitoyl-GPC (P-16:0/16:0)*	Lipid	Plasmalogen		11146967		HMDB11206	0.001776	0.000391	6.03115e-06	-0.00712	0.005451	0.191916	0.001637	0.000481	0.000693221	0.00212	0.000658	0.00139321	-0.00045	0.000712	0.529972
52747	0.536979	0.119993	0.04721	0.253647	phenol glucuronide	Amino Acid	Tyrosine Metabolism	17685-05-1	87235		HMDB60014	0.006185	0.002155	0.00418613	0.02002	0.03013	0.506539	0.01081	0.002608	3.74922e-05	-0.00377	0.003821	0.324469	0.01298	0.004186	0.00196871
52748	0.358188	0.116122	0.0004401	0.373724	1-(1-enyl-stearoyl)-2-linoleoyl-GPE (P-18:0/18:2)*	Lipid	Plasmalogen				HMDB11376	0.00112	0.000566	0.0480502	0.01369	0.007892	0.0831719	0.00135	0.000689	0.0505582	0.000505	0.000998	0.612774	0.002138	0.001081	0.0481435
52769	0.377691	0.121131	0.003031	0.375159	X - 24452	Unknown						0.004711	0.000545	1.71482e-17	-0.02731	0.007498	0.000281837	0.005802	0.000686	1.29428e-16	0.00277	0.000873	0.00165067	0.003042	0.001016	0.00281083
52772	0.134992	0.103058	0.162	0.121659	X - 24455	Unknown						0.001913	0.001037	0.0654513	-0.04698	0.01464	0.00136732	0.001334	0.001283	0.298491	0.00301	0.001756	0.0873578	-0.0024	0.002047	0.241734
52773	0.202787	0.123155	0.1019	0.198797	X - 24456	Unknown						0.005243	0.001502	0.000499162	-0.04787	0.02101	0.0228836	0.005749	0.001787	0.00135006	0.004947	0.002793	0.0773013	0.000697	0.002893	0.809535
52779	0.693529	0.110551	4.285e-06	0.552651	X - 24462	Unknown						0.001534	0.001439	0.286577	0.007984	0.0199	0.68835	0.002558	0.001756	0.145509	-8e-05	0.002513	0.975396	0.001715	0.002637	0.515663
52788	0.496688	0.117012	0.009916	0.339921	X - 24471	Unknown						0.000476	0.000248	0.0551064	-0.05794	0.003469	1.81346e-56	0.000679	0.000307	0.0270177	0.000217	0.000418	0.603167	0.000569	0.000464	0.220151
52790	0.482266	0.108228	0.01077	0.250519	X - 24473	Unknown						0.01158	0.001819	2.89224e-10	0.06281	0.02529	0.0131461	0.01317	0.00227	9.63471e-09	0.008847	0.003041	0.00385511	0.004957	0.003542	0.161834
52797	0.244018	0.129851	0.278	0.122468	X - 12111	Unknown						0.01192	0.002349	4.60179e-07	-0.01877	0.03269	0.565944	0.01582	0.002816	2.7124e-08	0.004589	0.004241	0.27993	0.01089	0.004586	0.0177696
528	0.131667	0.109846	0.5	0	alpha-ketoglutarate	Energy	TCA Cycle	305-72-6;328-50-7;22202-68-2	51	C00026	HMDB00208	0.001493	0.000632	0.0182977	0.01637	0.008971	0.0682938	0.001011	0.000686	0.140804	0.00171	0.001259	0.175159	0.000694	0.001233	0.573258
52809	0.242204	0.134884	0.1538	0.160627	X - 24490	Unknown						0.006927	0.001568	1.09697e-05	0.04635	0.0218	0.0337279	0.008567	0.001971	1.58098e-05	0.003726	0.002546	0.144255	0.004794	0.003031	0.113918
52813	0.465085	0.113579	0.01108	0.350052	X - 24494	Unknown						0.00384	0.001669	0.0215737	-0.07004	0.02303	0.00240637	0.004379	0.002014	0.0299926	0.00107	0.002995	0.721005	0.003111	0.003054	0.308514
52835	0.506367	0.123387	0.04704	0.281177	X - 24514	Unknown						0.009388	0.000923	2.96196e-23	-0.06079	0.01292	2.82667e-06	0.01062	0.001162	5.57164e-19	0.006739	0.001478	6.96336e-06	0.004176	0.00178	0.0190975
52848				0.316983	X - 24527	Unknown						0.00818	0.001288	3.09432e-10	0.03597	0.01789	0.0446119	0.00837	0.001626	3.31003e-07	0.00756	0.00208	0.000317761	0.000701	0.002418	0.771776
52862	0.185718	0.130465	0.5	0	X - 24541	Unknown						-0.00361	0.001633	0.0271645	-0.1244	0.02289	6.71437e-08	-0.00358	0.001884	0.0575411	-0.00394	0.003242	0.225061	-0.00045	0.003253	0.890131
52863	0.31798	0.129068	0.05048	0.209332	X - 24542	Unknown						0.001671	0.001701	0.326343	0.04674	0.02388	0.0505745	0.003692	0.002085	0.0770376	-0.00139	0.002942	0.63682	0.006329	0.003336	0.0579713
52865	0.548575	0.113304	1.376e-05	0.47902	X - 24544	Unknown						-0.00919	0.001429	1.8956e-10	-0.217	0.01976	8.91448e-27	-0.00863	0.001837	3.06832e-06	-0.01097	0.002186	8.07011e-07	0.001078	0.002632	0.68216
52867	0.419922	0.112956	5.775e-05	0.421409	X - 24546	Unknown						-0.01539	0.002131	9.11983e-13	-0.3178	0.02963	1.07748e-25	-0.01596	0.002644	2.43696e-09	-0.01578	0.003531	1.05235e-05	-0.00039	0.003923	0.920645
52870	0.410016	0.109262	0.000737	0.302942	X - 24549	Unknown						-0.00948	0.002031	3.43199e-06	0.009829	0.02826	0.728035	-0.00853	0.002449	0.000524118	-0.00995	0.003676	0.00713325	0.001614	0.003874	0.676944
52871	0.183995	0.109743	0.297	0.106954	X - 24550	Unknown						0.004979	0.00213	0.0195738	0.1048	0.02991	0.000473203	0.001356	0.002644	0.608338	0.01095	0.003533	0.00208779	-0.0091	0.004167	0.0291797
52872	0.026908	0.107093	0.4858	0.054071	X - 24551	Unknown						0.007586	0.002667	0.00454544	0.2359	0.03771	5.59308e-10	0.005873	0.00344	0.0882798	0.01048	0.004091	0.0107961	-0.00508	0.005263	0.334477
52873	0.379601	0.116091	0.5	0.0573835	X - 24552	Unknown						0.003691	0.001796	0.0400626	0.08542	0.02535	0.000776699	0.000872	0.002225	0.69534	0.008415	0.002965	0.00480743	-0.0073	0.00356	0.040541
52876	0.501045	0.113735	0.5	0.16799	X - 24555	Unknown						0.003677	0.00213	0.0846074	0.08	0.02994	0.00765083	-0.00101	0.002626	0.701945	0.01161	0.003581	0.00130509	-0.01367	0.004167	0.00106182
52877	0.257176	0.115229	0.08474	0.136681	X - 24556	Unknown						0.003461	0.000993	0.000512404	-0.00697	0.0139	0.616283	0.004275	0.001191	0.000351962	0.002254	0.00183	0.218812	0.001653	0.001923	0.3901
52878	0.107111	0.110725	0.5	0.0162299	X - 24557	Unknown						0.006765	0.002396	0.00484399	0.2137	0.03389	4.06981e-10	0.006174	0.003099	0.0467579	0.007605	0.003659	0.0383635	-0.00093	0.004736	0.844011
52879	0.118118	0.109116	0.4999	0.0179484	X - 24558	Unknown						0.003954	0.002171	0.0688815	0.1086	0.03062	0.000407045	0.000657	0.002689	0.807059	0.009905	0.003684	0.00751143	-0.0089	0.004263	0.0370258
52880	0.435565	0.117664	0.5	0.0920382	X - 24559	Unknown						0.002316	0.002147	0.281006	0.08225	0.03021	0.00658697	-0.00125	0.002664	0.639089	0.008127	0.003595	0.0243901	-0.00906	0.004246	0.0329902
52881	0.104545	0.105778	0.5	0.0225396	X - 24560	Unknown						0.004632	0.002053	0.0242607	0.09747	0.02902	0.000806841	0.002107	0.002561	0.411009	0.009096	0.003471	0.00916239	-0.00645	0.004049	0.111198
52909	0.358891	0.129265	0.005887	0.27734	X - 24588	Unknown						0.001411	0.000685	0.0395158	-0.0821	0.009509	1.89081e-17	0.001658	0.000827	0.0452836	0.000718	0.001234	0.560753	0.001146	0.001278	0.370224
52914	0.372413	0.126241	0.003602	0.326878	5-hydroxyindole sulfate	Amino Acid	Tryptophan Metabolism					0.001159	0.001695	0.494331	-0.04373	0.02354	0.063463	-4e-05	0.002018	0.983456	0.002971	0.003107	0.339566	-0.00387	0.003238	0.231934
52916	0.050609	0.119012	0.5	0	2-hydroxylaurate	Lipid	Fatty Acid, Monohydroxy	2984-55-6	97783			-0.00455	0.001535	0.00307339	-0.08075	0.02163	0.000197218	-0.00212	0.0019	0.265809	-0.00991	0.00268	0.000250319	0.005728	0.00296	0.0531423
52925	0.180481	0.121317	0.2402	0.0842844	phenylacetylglutamate	Peptide	Acetylated Peptides		11579826		HMDB59772	0.01021	0.001691	2.21013e-09	0.1877	0.02375	6.45561e-15	0.01027	0.002082	9.9407e-07	0.0107	0.002929	0.000297838	2.2e-05	0.003279	0.994654
52929	0.299267	0.124215	0.08976	0.242341	3,4-methyleneheptanoylcarnitine	Lipid	Fatty Acid Metabolism(Acyl Carnitine)					0.003566	0.001729	0.0394107	-0.05818	0.02422	0.0164378	0.00679	0.002125	0.00145662	-0.00315	0.002968	0.289964	0.009028	0.003351	0.00713363
52944	0.379382	0.120124	0.007109	0.39946	palmitoylcholine	Lipid	Fatty Acid Metabolism (Acyl Choline)		151731			0.001011	0.001065	0.342796	0.06837	0.01488	4.84824e-06	0.001407	0.001313	0.284365	-0.00049	0.001815	0.786449	0.00079	0.002078	0.703974
52974	0.580217	0.114716	0.5	0.217058	glycochenodeoxycholate sulfate	Lipid	Primary Bile Acid Metabolism					0.000404	0.002116	0.848786	-0.1012	0.02955	0.000633469	-0.00286	0.002594	0.27075	0.007444	0.003625	0.04078	-0.00897	0.004142	0.0305707
52975	0.29741	0.124322	0.02333	0.37911	glycodeoxycholate sulfate	Lipid	Secondary Bile Acid Metabolism					0.001734	0.002179	0.426387	0.02798	0.03016	0.353808	-0.00117	0.002664	0.660272	0.00783	0.003747	0.0373864	-0.00928	0.004198	0.0272808
52977	0.214999	0.120099	0.1682	0.123306	glycocholate glucuronide (1)	Lipid	Primary Bile Acid Metabolism					0.00846	0.002379	0.000394428	0.1437	0.03364	2.09502e-05	0.007748	0.002993	0.00982068	0.01017	0.003956	0.0105463	-0.00463	0.004567	0.311059
52983	0.370466	0.112848	0.5	0.159254	glycochenodeoxycholate glucuronide (1)	Lipid	Primary Bile Acid Metabolism					0.001362	0.002011	0.498364	-0.1929	0.0281	1.07354e-11	-0.00061	0.00261	0.816203	0.005214	0.002931	0.0760629	-0.00423	0.003827	0.269575
52984	0.21595	0.117011	0.0537	0.134953	3-hydroxybutyrylcarnitine (2)	Lipid	Fatty Acid Metabolism(Acyl Carnitine)				HMDB13127	0.006957	0.000946	3.93559e-13	0.04532	0.01329	0.000673521	0.007504	0.001169	2.47468e-10	0.005381	0.001634	0.00109126	0.002084	0.00182	0.252438
52988	0.001548	0.101443	0.5	0	adipoylcarnitine (C6-DC)	Lipid	Fatty Acid Metabolism(Acyl Carnitine)		71296139		HMDB61677	0.007935	0.001102	1.14985e-12	-0.02906	0.01547	0.0606093	0.009534	0.001389	1.37732e-11	0.004827	0.001799	0.00764428	0.004907	0.002124	0.021046
53	0.343032	0.110908	0.0004509	0.373636	glutamine	Amino Acid	Glutamate Metabolism	56-85-9	5961	C00064	HMDB00641	0.000528	0.000197	0.00750398	-0.00459	0.002745	0.0945103	0.000666	0.000237	0.0050662	0.000279	0.000356	0.433215	0.000312	0.000374	0.403353
53010	0.45337	0.12033	6.462e-05	0.440388	lactosyl-N-palmitoyl-sphingosine (d18:1/16:0)	Lipid	Ceramides	4201-62-1				-0.00019	0.000423	0.652436	-0.00876	0.005857	0.134799	-0.00077	0.000512	0.134695	0.000732	0.000738	0.322063	-0.00174	0.000771	0.0242241
53013	0.568999	0.142037	0.5	0.411786	glycosyl-N-palmitoyl-sphingosine (d18:1/16:0)	Lipid	Ceramides					0.000894	0.000483	0.0643618	0.01311	0.006699	0.0506283	0.000692	0.000587	0.239075	0.000899	0.000847	0.288955	-0.00034	0.000908	0.707415
53026	0.249013	0.133335	0.5	0	3,4-methyleneheptanoate	Xenobiotics	Food Component/Plant					-0.00121	0.001674	0.469129	0.01325	0.02339	0.571149	-0.00083	0.002027	0.682992	-0.00348	0.002991	0.245367	0.00251	0.003325	0.450444
53031	0.490584	0.115193	1.555e-05	0.478186	methylsuccinoylcarnitine	Amino Acid	Leucine, Isoleucine and Valine Metabolism					0.01078	0.002567	2.89816e-05	-0.01118	0.0356	0.753534	0.01271	0.003151	6.04896e-05	0.00758	0.004426	0.0876257	0.004034	0.00486	0.406701
53065				0.358587	X - 24637	Unknown						-0.0033	0.002616	0.207015	-0.03662	0.03651	0.316008	-0.00131	0.003206	0.68306	-0.00888	0.004512	0.0497659	0.004845	0.005157	0.347664
53097	0.199269	0.125109	0.2825	0.206735	X - 24669	Unknown						0.003413	0.001783	0.0559254	-0.06575	0.02487	0.00831893	0.002256	0.002107	0.284572	0.00655	0.003259	0.0451832	-0.00432	0.00346	0.212465
531	0.309804	0.117531	0.04491	0.25625	3-hydroxy-3-methylglutarate	Lipid	Mevalonate Metabolism	503-49-1	1662	C03761	HMDB00355	0.003794	0.000589	1.82458e-10	0.01226	0.008208	0.13568	0.003149	0.000676	3.76291e-06	0.004766	0.001129	3.16773e-05	-0.00089	0.001137	0.434282
53114	0.347564	0.126126	0.05383	0.145287	X - 24686	Unknown						0.001192	0.000714	0.0951964	-0.1204	0.01003	2.27939e-31	0.001293	0.000902	0.152228	0.000866	0.001149	0.451175	0.001299	0.001415	0.358919
53127	0.328381	0.115818	0.09621	0.162889	X - 24699	Unknown						0.003082	0.000492	5.57834e-10	-0.07731	0.006913	1.14984e-27	0.003672	0.000607	2.26237e-09	0.002091	0.000838	0.013089	0.001083	0.000958	0.258494
53157	0.292161	0.123801	0.5	0.061453	X - 24728	Unknown						0.006184	0.000734	1.21484e-16	-0.03694	0.01029	0.000342208	0.006795	0.000948	1.89871e-12	0.004965	0.001123	1.29725e-05	0.001525	0.001441	0.289983
53172	0.18307	0.116481	0.1319	0.0678605	X - 24736	Unknown						0.008613	0.001939	9.84715e-06	0.1104	0.02723	5.39865e-05	0.00984	0.002351	3.17325e-05	0.005854	0.003502	0.0955182	0.003017	0.003784	0.425389
53176	0.132684	0.096319	0.1201	0.17196	1-linoleoyl-2-linolenoyl-GPC (18:2/18:3)*	Lipid	Phosphatidylcholine (PC)				HMDB08141	0.003359	0.001246	0.00712396	0.0671	0.01747	0.000129897	0.00459	0.001522	0.00264915	0.001043	0.002184	0.633428	0.002668	0.002457	0.277671
53180	0.228645	0.126323	0.5	0.127526	1-palmitoleoyl-2-linolenoyl-GPC (16:1/18:3)*	Lipid	Phosphatidylcholine (PC)				HMDB08008	0.004537	0.002532	0.0734604	0.08685	0.03582	0.0154914	0.006898	0.00322	0.0324826	0.001515	0.004206	0.718857	0.005018	0.005042	0.31976
53195	0.224116	0.134029	0.3359	0.122947	1-myristoyl-2-arachidonoyl-GPC (14:0/20:4)*	Lipid	Phosphatidylcholine (PC)				HMDB07883	-0.00164	0.000808	0.0425998	0.08569	0.01143	1.30762e-13	-0.00014	0.000954	0.881569	-0.00505	0.001506	0.000888906	0.004914	0.001555	0.00160984
53209	0.823581	0.098274	4.123e-06	0.685947	1-oleoyl-2-docosahexaenoyl-GPE (18:1/22:6)*	Lipid	Phosphatidylethanolamine (PE)					0.004683	0.001725	0.00673764	0.162	0.02375	1.43634e-11	0.005933	0.002094	0.00472124	0.001833	0.002977	0.538505	0.00505	0.003186	0.113156
53223	0.569574	0.13025	0.08066	0.212041	palmitoleoylcarnitine (C16:1)*	Lipid	Fatty Acid Metabolism(Acyl Carnitine)		71464547			0.005426	0.0007	2.19056e-14	0.05009	0.009712	2.93707e-07	0.006148	0.000852	1.35022e-12	0.003789	0.001228	0.00220205	0.002255	0.001327	0.089422
53224	0.137335	0.117332	0.5	0.148982	pimeloylcarnitine/3-methyladipoylcarnitine (C7-DC)	Lipid	Fatty Acid Metabolism(Acyl Carnitine)					0.009465	0.001431	5.96441e-11	0.0497	0.02018	0.0139321	0.01013	0.001755	1.16863e-08	0.008435	0.002479	0.000743124	0.00169	0.002799	0.546173
53230	0.152742	0.110103	0.1496	0.176608	3-hydroxyhexanoate	Lipid	Fatty Acid, Monohydroxy	10191-24-9	151492			0.003329	0.000659	5.08418e-07	-0.00028	0.009259	0.976157	0.002927	0.000805	0.000297533	0.003885	0.001146	0.000776874	-0.00139	0.001291	0.283353
53231	0.625759	0.111099	0.5	0.195487	thioproline	Xenobiotics	Chemical	34592-47-4	93176			0.000656	0.00049	0.181305	-0.03732	0.006919	8.3061e-08	0.000807	0.000593	0.173845	0.000436	0.000881	0.62056	0.001602	0.000947	0.0909927
53242	0.506327	0.123477	0.08434	0.179329	5-bromotryptophan	Amino Acid	Tryptophan Metabolism		96735			-0.0011	0.000597	0.0659291	-0.02801	0.008312	0.000776267	-0.00094	0.000713	0.189074	-0.0011	0.001101	0.316448	-0.00032	0.001134	0.780072
53254	0.3838	0.119836	0.00566	0.3894	caffeic acid sulfate	Xenobiotics	Xanthine Metabolism				HMDB41708	0.005221	0.002146	0.0151359	-0.07447	0.0297	0.0122883	0.00571	0.002568	0.0264692	0.004379	0.003909	0.263449	0.002363	0.004125	0.566784
53258	0.311191	0.122225	0.01177	0.255725	eicosapentaenoylcholine	Lipid	Fatty Acid Metabolism (Acyl Choline)					0.004845	0.001637	0.00314216	0.1307	0.02289	1.42176e-08	0.006694	0.002107	0.00154429	0.001725	0.002496	0.49003	0.004042	0.003169	0.202343
53260	0.40956	0.122024	0.004517	0.416023	oleoylcholine	Lipid	Fatty Acid Metabolism (Acyl Choline)					0.000929	0.001145	0.41743	0.08349	0.016	2.16454e-07	0.001207	0.001398	0.388191	-0.00029	0.002004	0.886942	0.000749	0.00224	0.738139
53261	0.416226	0.119908	0.02473	0.389968	arachidonoylcholine	Lipid	Fatty Acid Metabolism (Acyl Choline)					-0.00032	0.001084	0.768225	0.08637	0.01515	1.51133e-08	3.3e-05	0.001338	0.980595	-0.0016	0.001851	0.388634	0.000746	0.002103	0.722731
53262	0.253403	0.118303	0.03858	0.235994	dihomo-linolenoyl-choline	Lipid	Fatty Acid Metabolism (Acyl Choline)					-0.00052	0.001466	0.720406	0.1011	0.02063	1.08889e-06	0.000627	0.001814	0.729727	-0.00375	0.002506	0.135917	0.002768	0.002898	0.339689
53263	0.327902	0.116268	0.04091	0.385242	docosahexaenoylcholine	Lipid	Fatty Acid Metabolism (Acyl Choline)					0.00595	0.001437	3.74164e-05	0.1342	0.02004	3.26849e-11	0.00569	0.001754	0.00122897	0.006361	0.00251	0.0117037	-0.00185	0.002775	0.50498
53266	0.529392	0.121586	0.1127	0.325438	X - 24747	Unknown						-0.00458	0.002581	0.0763607	-0.08749	0.03582	0.0147342	-0.00766	0.00317	0.0159115	0.001758	0.004435	0.691988	-0.0066	0.004939	0.181945
53267	0.587077	0.13248	0.5	0.375577	X - 24748	Unknown						-0.00104	0.000807	0.197875	0.006999	0.01114	0.530037	-0.00033	0.000984	0.739499	-0.00267	0.001413	0.0596553	0.002206	0.001543	0.153016
54	0.43461	0.120236	0.00149	0.385	tryptophan	Amino Acid	Tryptophan Metabolism	73-22-3	6305	C00078	HMDB00929	-0.00074	0.000272	0.00638852	-0.0423	0.003789	1.43984e-27	-0.00072	0.000338	0.0328021	-0.00079	0.000455	0.0846019	0.000261	0.000527	0.620395
541	0.300402	0.128902	0.1105	0.232	4-hydroxyphenylacetate	Amino Acid	Phenylalanine Metabolism	156-38-7	127	C00642	HMDB00020	0.002233	0.00126	0.0766073	-0.03881	0.01763	0.0279265	0.001911	0.001474	0.195351	0.003227	0.002427	0.184676	0.000591	0.002495	0.81292
542	0.25698	0.130885	0.5	0.0868356	3-hydroxybutyrate (BHBA)	Lipid	Ketone Bodies	625-72-9	441	C01089	HMDB00357	0.00449	0.001394	0.0013181	0.0061	0.01967	0.75657	0.003895	0.001749	0.0262421	0.005667	0.002322	0.0151379	-0.00346	0.00275	0.208342
54695	0.246708	0.137803	0.1275	0.106564	X - 24757	Unknown						0.00446	0.001706	0.00910036	0.0487	0.02407	0.0432746	0.00473	0.002106	0.0250407	0.004618	0.002968	0.120616	0.001606	0.00339	0.635627
54703	0.309505	0.108931	0.5	0.0904319	X - 24765	Unknown						0.00115	0.000633	0.0694956	-0.01287	0.009008	0.153237	0.000764	0.000816	0.349097	0.002134	0.000993	0.0325188	-0.00164	0.001289	0.204178
54704	0.291197	0.121087	0.02852	0.288319	X - 24766	Unknown						0.003483	0.000453	3.29508e-14	-0.01937	0.006265	0.00204062	0.003502	0.000575	1.76363e-09	0.003739	0.000719	3.38587e-07	-4e-05	0.000849	0.966349
54805	0.449582	0.119548	0.1776	0.20134	3beta-hydroxy-5-cholestenoate	Lipid	Sterol	6561-58-6	165511	C17333		0.000689	0.000589	0.242612	-0.04694	0.008203	1.33898e-08	0.000357	0.000701	0.610756	0.001354	0.001079	0.210349	-0.00142	0.001125	0.206906
54837	0.862317	0.077988	5.551e-17	0.892659	X - 24809	Unknown						0.008044	0.00229	0.000460207	0.09913	0.03165	0.0017792	0.009993	0.00275	0.000295053	0.005791	0.004173	0.166009	0.002334	0.003127	0.455569
54839	0.680888	0.099431	2.867e-09	0.607111	X - 24811	Unknown						0.004942	0.002098	0.0186515	-0.05757	0.02891	0.0466761	0.004042	0.00251	0.10771	0.005775	0.003831	0.132523	-9e-05	0.003793	0.980804
54840	0.324275	0.121505	0.3894	0.0803517	X - 24812	Unknown						0.003789	0.001339	0.00475212	-0.03527	0.01883	0.0612993	0.00364	0.001668	0.0293517	0.004022	0.00227	0.0771956	0.000547	0.00258	0.832061
54841	0.160968	0.120978	0.5	0.0143802	X - 24813	Unknown						0.000256	0.000308	0.406104	0.005445	0.004345	0.21037	0.000491	0.000349	0.160654	-0.00054	0.000603	0.371774	0.001091	0.000617	0.0773958
54873	0.36418	0.116412	0.04448	0.258354	X - 24845	Unknown						-0.01412	0.002065	1.29472e-11	-0.1022	0.0289	0.000421986	-0.01564	0.002514	8.28586e-10	-0.01122	0.003657	0.00231108	-0.00418	0.003961	0.291003
54877	0.376413	0.113555	0.006265	0.298219	X - 24849	Unknown						0.002291	0.000945	0.0155028	-0.1197	0.0132	4.64972e-19	0.002649	0.001145	0.0209789	0.001427	0.001699	0.401681	0.000241	0.00181	0.893922
54885	0.388768	0.132317	0.03143	0.289985	1-linoleoyl-GPG (18:2)*	Lipid	Lysophospholipid					0.000114	0.000698	0.870761	-0.01041	0.009645	0.280619	0.000629	0.000866	0.467667	-0.00074	0.001179	0.533247	0.001007	0.001352	0.45644
54907	0.330459	0.126711	0.007115	0.331427	hexanoylglutamine	Lipid	Fatty Acid Metabolism (Acyl Glutamine)					0.007256	0.001498	1.43703e-06	0.01261	0.02073	0.543041	0.007051	0.00181	0.000105894	0.007811	0.00268	0.00378356	-0.00133	0.002845	0.6414
54910	0.155085	0.111141	0.1588	0.215308	vanillactate	Amino Acid	Tyrosine Metabolism	2475-56-1	160637		HMDB00913	0.009349	0.001291	8.34332e-13	-0.00302	0.01801	0.866779	0.0122	0.001641	2.78272e-13	0.004581	0.002035	0.0250329	0.00934	0.002495	0.000189405
54923	0.619984	0.113512	0.002233	0.367915	beta-citrylglutamate	Amino Acid	Glutamate Metabolism	73590-26-8	72715786	C20775		0.003442	0.00062	3.46096e-08	-0.00755	0.008577	0.379194	0.00347	0.000745	3.69739e-06	0.003053	0.001117	0.00654867	0.000174	0.001164	0.881491
54945	0.167535	0.128189	0.4594	0	oleoyl-oleoyl-glycerol (18:1/18:1) [1]*	Lipid	Diacylglycerol				HMDB07218	0.000136	0.001614	0.932675	-0.01666	0.02281	0.465205	0.000694	0.002012	0.730298	-0.001	0.002753	0.715786	0.00403	0.003118	0.196302
54946	0.515896	0.128133	0.005698	0.214522	oleoyl-oleoyl-glycerol (18:1/18:1) [2]*	Lipid	Diacylglycerol				HMDB07218	-0.00049	0.001004	0.625052	0.001271	0.01398	0.927605	0.000878	0.001183	0.45819	-0.00324	0.001902	0.0890982	0.00475	0.001917	0.013322
54955	0.166446	0.123799	0.3499	0.02516	linoleoyl-arachidonoyl-glycerol (18:2/20:4) [1]*	Lipid	Diacylglycerol				HMDB07257	-0.00376	0.001723	0.0294234	-0.05507	0.02416	0.0228272	-0.00364	0.002145	0.0902588	-0.00536	0.002913	0.0664733	0.000828	0.00338	0.80661
54956	0.684139	0.136628	0.5	0.506706	linoleoyl-arachidonoyl-glycerol (18:2/20:4) [2]*	Lipid	Diacylglycerol				HMDB07257	-0.00207	0.001391	0.136885	-0.01191	0.01922	0.535479	-0.00163	0.001679	0.333469	-0.00282	0.002515	0.263315	0.003477	0.002685	0.195617
54960	0.377783	0.114045	0.5	0.0182237	oleoyl-arachidonoyl-glycerol (18:1/20:4) [1]*	Lipid	Diacylglycerol				HMDB07228	-0.00182	0.001448	0.208449	0.0235	0.02065	0.25536	-0.00033	0.001742	0.850975	-0.00496	0.002721	0.0691648	0.004964	0.00288	0.0849999
54961	0.325741	0.128103	0.01676	0.171313	oleoyl-arachidonoyl-glycerol (18:1/20:4) [2]*	Lipid	Diacylglycerol				HMDB07228	-0.00182	0.001257	0.14787	0.02513	0.01744	0.149958	0.000626	0.001487	0.673978	-0.00667	0.002321	0.00428062	0.009238	0.002386	0.000113224
54967	0.425795	0.131537	0.003987	0.252552	palmitoleoyl-linoleoyl-glycerol (16:1/18:2) [1]*	Lipid	Diacylglycerol				HMDB07132	-0.00351	0.001609	0.0292134	0.01314	0.02269	0.562764	-0.00293	0.001975	0.138918	-0.00478	0.002819	0.0910208	0.002161	0.003139	0.491352
54968	0.45011	0.129524	0.009157	0.191413	linoleoyl-linoleoyl-glycerol (18:2/18:2) [1]*	Lipid	Diacylglycerol				HMDB07248	-0.00201	0.001178	0.0879314	-0.05476	0.01652	0.000940973	-0.00174	0.001437	0.22539	-0.00319	0.002072	0.124971	0.000394	0.002293	0.863475
54977				0.570264	X - 24870	Unknown						0.001794	0.000402	8.91074e-06	0.04819	0.005558	1.41583e-17	0.00141	0.000497	0.00465074	0.002447	0.000682	0.000377727	-0.00039	0.000718	0.583053
54979	0.507683	0.107165	3.435e-06	0.428849	N-stearoyl-sphingosine (d18:1/18:0)*	Lipid	Ceramides	104404-17-3	5283565		HMDB04950	0.003052	0.000626	1.21669e-06	0.04437	0.008663	3.54028e-07	0.004737	0.000753	5.15744e-10	-0.00031	0.001106	0.778823	0.005047	0.001143	1.08081e-05
55	0.605698	0.10941	0.009792	0.329	beta-alanine	Nucleotide	Pyrimidine Metabolism, Uracil containing	56-41-7;107-95-9	239	C00099	HMDB00056	0.000696	0.000401	0.0825896	-0.01619	0.005563	0.00368877	0.001217	0.00048	0.0114852	-0.00036	0.000726	0.622732	0.001472	0.000779	0.0589769
55015	0.542614	0.11743	9.546e-07	0.499609	gamma-glutamyl-alpha-lysine	Peptide	Gamma-glutamyl Amino Acid		65254			0.001504	0.000357	2.74433e-05	-0.0077	0.004928	0.118274	0.001754	0.000436	6.27293e-05	0.001067	0.000632	0.0922021	0.0008	0.000682	0.240769
55017	0.387361	0.10684	0.002703	0.319788	4-hydroxyphenylacetylglutamine	Peptide	Acetylated Peptides					0.007953	0.001569	4.70254e-07	-0.06314	0.0219	0.00401142	0.007719	0.00194	7.5828e-05	0.008861	0.002663	0.000967758	0.000424	0.003017	0.888301
55072	0.261683	0.127634	0.04901	0.241652	2-oxoarginine*	Amino Acid	Urea cycle; Arginine and Proline Metabolism	663193	558	C03771	HMDB04225	8.1e-05	0.001051	0.938567	-0.1121	0.01473	5.7044e-14	0.00099	0.001261	0.432453	-0.00148	0.001931	0.444817	0.003665	0.002065	0.0762306
554	0.025535	0.105511	0.4928	0.0137047	adenine	Nucleotide	Purine Metabolism, Adenine containing	73-24-5	190	C00147	HMDB00034	0.003041	0.000597	4.13168e-07	0.005793	0.00846	0.493628	0.003436	0.000725	2.56809e-06	0.001811	0.001055	0.0868674	0.001426	0.001188	0.23016
555	0.241204	0.110018	0.02867	0.198715	adenosine	Nucleotide	Purine Metabolism, Adenine containing	58-61-7	60961	C00212	HMDB00050	0.000554	0.00089	0.534002	0.01443	0.01242	0.245538	0.000989	0.001105	0.370987	0.000206	0.001489	0.889781	8e-05	0.001683	0.962098
56	0.426682	0.123808	0.005812	0.289	cystine	Amino Acid	Methionine, Cysteine, SAM and Taurine Metabolism	56-89-3	67678	C00491	HMDB00192	0.003505	0.00061	1.20717e-08	-0.01234	0.008478	0.145855	0.003554	0.000739	1.83148e-06	0.003214	0.001093	0.0035055	0.00016	0.001203	0.893929
566	0.621316	0.09961	0.5	0.311723	phenylpyruvate	Amino Acid	Phenylalanine Metabolism	156-06-9	997	C00166	HMDB00205	-0.00275	0.000651	2.58325e-05	-0.08969	0.009019	1.9592e-22	-0.00304	0.000831	0.000266196	-0.00183	0.001003	0.0692497	-0.00058	0.001273	0.65007
569	0.426541	0.100111	0.001958	0.263393	caffeine	Xenobiotics	Xanthine Metabolism	58-08-2	2519	C07481	HMDB01847	-0.00418	0.003038	0.169065	-0.03508	0.04266	0.411028	-0.00622	0.003644	0.0884691	0.000688	0.005555	0.90151	-0.00774	0.005714	0.175507
57	0.645439	0.105506	5.301e-08	0.487	glutamate	Amino Acid	Glutamate Metabolism	56-86-0	611	C00025	HMDB00148	0.001419	0.000742	0.056122	-0.1284	0.01034	2.29001e-33	0.001814	0.000944	0.0550796	0.000695	0.001148	0.545501	0.001911	0.001406	0.174193
573	0.273386	0.118434	0.05309	0.178686	cytosine	Nucleotide	Pyrimidine Metabolism, Cytidine containing	71-30-7	597	C00380	HMDB00630	0.003215	0.001449	0.026704	-0.05897	0.02033	0.0038011	0.003448	0.001706	0.0436257	0.003256	0.00274	0.235474	-0.00049	0.002897	0.866482
57330	0.195013	0.118055	0.1053	0.224283	lignoceroyl sphingomyelin (d18:1/24:0)	Lipid	Sphingolipid Metabolism	60037-60-7				-0.0008	0.000428	0.0626482	0.01733	0.005985	0.00386034	-0.00026	0.000522	0.619457	-0.00209	0.00076	0.00635744	0.002552	0.000807	0.00158879
57331	0.531725	0.110589	6.977e-07	0.544891	behenoyl dihydrosphingomyelin (d18:0/22:0)*	Lipid	Sphingolipid Metabolism				HMDB12091	-0.00163	0.000752	0.0301004	0.01858	0.01038	0.0737505	-0.00037	0.000904	0.682297	-0.00402	0.001337	0.00281908	0.005053	0.001362	0.000213484
57365	0.420199	0.128937	0.1357	0.258738	myristoyl dihydrosphingomyelin (d18:0/14:0)*	Lipid	Sphingolipid Metabolism				HMDB12085	-9e-05	0.000502	0.853313	0.0468	0.006946	2.53204e-11	0.000423	0.000612	0.489393	-0.00075	0.00088	0.397368	0.002067	0.000943	0.0285597
57370	0.553972	0.117586	7.654e-06	0.541806	lactosyl-N-nervonoyl-sphingosine (d18:1/24:1)*	Lipid	Ceramides					0.001197	0.000568	0.0353656	0.03431	0.007874	1.43048e-05	0.001257	0.000702	0.07394	0.000742	0.000947	0.434264	0.000948	0.000995	0.340773
57407	0.304606	0.12904	0.1254	0.238671	myristoyl-linoleoyl-glycerol (14:0/18:2) [1]*	Lipid	Diacylglycerol					-0.0034	0.002278	0.135949	-0.09746	0.03219	0.00251756	-0.00148	0.002781	0.594482	-0.00862	0.004072	0.0350726	0.007354	0.004419	0.0963198
57417	0.340478	0.127647	0.002975	0.177472	N-stearoyl-sphingadienine (d18:2/18:0)*	Lipid	Ceramides					0.00251	0.001386	0.0704564	0.146	0.01946	1.2439e-13	0.004818	0.001646	0.00352395	-0.00156	0.002538	0.538765	0.00489	0.002691	0.069379
57421	0.546683	0.116973	0.002622	0.346951	glycosyl-N-behenoyl-sphingadienine (d18:2/22:0)*	Lipid	Ceramides					0.002532	0.000558	6.23138e-06	0.06683	0.007734	1.79449e-17	0.003338	0.000677	1.00161e-06	0.000489	0.000956	0.609246	0.002684	0.001002	0.00748386
57422	0.292295	0.121188	0.1706	0.16659	lactosyl-N-behenoyl-sphingosine (d18:1/22:0)*	Lipid	Sphingolipid Metabolism					0.002206	0.000802	0.00603923	0.06665	0.01121	3.60076e-09	0.002536	0.000946	0.00753056	0.00086	0.001501	0.567205	0.000815	0.001528	0.594124
57428	0.154522	0.10722	0.1096	0.164832	hexadecasphingosine (d16:1)*	Lipid	Sphingolipid Metabolism					-7e-05	0.001071	0.946392	0.03234	0.01493	0.0304837	0.000316	0.001329	0.812031	-0.00119	0.00182	0.514783	0.002711	0.002083	0.193369
57430	0.516779	0.111511	0.04581	0.234523	N-palmitoyl-heptadecasphingosine (d17:1/16:0)*	Lipid	Sphingolipid Metabolism					0.003995	0.001086	0.000244571	0.03668	0.01516	0.0157062	0.004606	0.00135	0.000682464	0.002623	0.001795	0.144786	0.004102	0.002082	0.0490758
57443	0.425518	0.113476	7.106e-05	0.412299	ceramide (d18:2/24:1, d18:1/24:2)*	Lipid	Ceramides					0.002743	0.000531	2.76918e-07	0.05005	0.007334	1.40624e-11	0.003796	0.000637	3.76676e-09	0.000297	0.000954	0.755454	0.002903	0.000984	0.0032194
57448	0.099902	0.118334	0.5	0	glycosyl ceramide (d18:1/23:1, d17:1/24:1)*	Lipid	Ceramides					0.005472	0.001955	0.00521631	0.04644	0.02784	0.0955407	0.003644	0.002422	0.132901	0.009952	0.003409	0.00373094	-0.00484	0.003948	0.220382
57453	0.574436	0.121288	2.152e-05	0.483364	glycosyl ceramide (d18:2/24:1, d18:1/24:2)*	Lipid	Ceramides					0.00307	0.000624	9.82965e-07	0.09174	0.00865	3.66995e-25	0.003357	0.000733	5.43827e-06	0.002021	0.001152	0.0800557	0.000112	0.001124	0.920632
57461	0.394401	0.121356	0.2427	0.249857	argininate*	Amino Acid	Urea cycle; Arginine and Proline Metabolism	157-07-3	160437		HMDB03148	0.001105	0.000771	0.152528	-0.1019	0.01077	1.61187e-20	0.00178	0.000956	0.0628939	-0.00028	0.001308	0.832735	0.002666	0.001489	0.0735491
57463	0.44627	0.118974	0.004741	0.418068	linoleoylcholine*	Lipid	Fatty Acid Metabolism (Acyl Choline)					0.000484	0.001085	0.655755	0.08462	0.01518	3.10051e-08	0.000744	0.001334	0.577081	-0.00078	0.001859	0.673435	0.000537	0.002118	0.79991
57464	0.500914	0.113835	0.003037	0.488024	stearoylcholine*	Lipid	Fatty Acid Metabolism (Acyl Choline)					0.00036	0.001255	0.774126	0.1138	0.01754	1.27559e-10	0.00078	0.001528	0.610175	-0.00094	0.002178	0.667001	0.000243	0.002459	0.921309
57473	0.517303	0.107169	1.039e-07	0.467906	sphingomyelin (d18:0/18:0, d19:0/17:0)*	Lipid	Sphingolipid Metabolism				HMDB12087	0.001182	0.000749	0.114603	0.05541	0.01042	1.24121e-07	0.002581	0.000896	0.00407258	-0.00133	0.001323	0.314586	0.00421	0.001398	0.00265203
57474	0.371587	0.125236	0.001781	0.303138	sphingomyelin (d18:2/18:1)*	Lipid	Sphingolipid Metabolism					0.000348	0.000526	0.508599	0.08145	0.007393	6.13643e-27	0.000606	0.000646	0.348473	-0.00043	0.000916	0.640613	0.000736	0.000999	0.461703
57475	0.318903	0.138787	0.05247	0.200301	sphingomyelin (d18:1/19:0, d19:1/18:0)*	Lipid	Sphingolipid Metabolism					0.002087	0.000482	1.64331e-05	0.09625	0.006795	3.6467e-42	0.003069	0.000582	1.78733e-07	0.000179	0.000843	0.831852	0.002982	0.000892	0.000848794
57476	0.472793	0.116448	6.312e-05	0.453265	sphingomyelin (d18:0/20:0, d16:0/22:0)*	Lipid	Sphingolipid Metabolism					-0.00033	0.000787	0.678783	0.04945	0.0109	6.3141e-06	0.000955	0.000938	0.308519	-0.00236	0.001418	0.0972357	0.004861	0.001453	0.000842639
57477	0.517477	0.128062	0.000318	0.341495	sphingomyelin (d18:1/22:2, d18:2/22:1, d16:1/24:2)*	Lipid	Sphingolipid Metabolism					0.001922	0.000476	5.68389e-05	0.08732	0.006604	2.71794e-37	0.001811	0.000586	0.00206885	0.001819	0.000802	0.0238752	-0.00026	0.000887	0.769411
57478	0.525147	0.128548	0.001143	0.465958	sphingomyelin (d18:1/25:0, d19:0/24:1, d20:1/23:0, d19:1/24:0)*	Lipid	Sphingolipid Metabolism					0.000245	0.000696	0.725395	0.003941	0.009652	0.683145	0.000949	0.000841	0.259233	-0.00099	0.001243	0.428005	0.004256	0.001243	0.0006323
57479	0.460874	0.125609	0.0006551	0.354933	sphingomyelin (d18:2/24:2)*	Lipid	Sphingolipid Metabolism					0.001614	0.000513	0.00168222	0.09422	0.007145	3.8983e-37	0.001246	0.000636	0.0504326	0.001963	0.000852	0.0217479	-0.00126	0.000942	0.182549
57480	0.32905	0.12569	0.007633	0.248562	sphingomyelin (d18:2/21:0, d16:2/23:0)*	Lipid	Sphingolipid Metabolism					0.001994	0.00048	3.53776e-05	0.166	0.006763	7.55125e-108	0.002742	0.00059	3.92459e-06	0.000227	0.000808	0.778986	0.002233	0.000873	0.0105672
57481	0.363807	0.133817	0.03284	0.165916	sphingomyelin (d18:1/20:2, d18:2/20:1, d16:1/22:2)*	Lipid	Sphingolipid Metabolism					0.001343	0.000607	0.0271349	0.1137	0.008503	4.90675e-38	0.001371	0.000735	0.0626196	0.00114	0.00108	0.291559	-0.00094	0.001168	0.418723
57482	0.499724	0.126713	0.0007303	0.331438	sphingomyelin (d18:2/23:1)*	Lipid	Sphingolipid Metabolism					0.002547	0.000508	6.37042e-07	0.1362	0.0071	1.19214e-71	0.003078	0.000618	7.67702e-07	0.001232	0.000887	0.165645	0.00135	0.000945	0.153319
57483	0.636559	0.108807	0.005844	0.430856	sphingomyelin (d17:2/16:0, d18:2/15:0)*	Lipid	Sphingolipid Metabolism					0.003098	0.000554	2.75325e-08	0.1713	0.007771	1.43943e-90	0.004127	0.000688	2.99713e-09	0.000912	0.000912	0.318139	0.003519	0.000996	0.000419491
575	0.085729	0.13256	0.5	0	arabinose	Carbohydrate	Pentose Metabolism	28697-53-2	66308	C00216	HMDB00646	0.003755	0.001341	0.00520407	-0.00149	0.01908	0.93762	0.003939	0.001636	0.0162939	0.003249	0.002525	0.199168	0.001432	0.002729	0.599746
57511	0.255436	0.133487	0.09384	0.118505	linolenoylcarnitine (C18:3)*	Lipid	Fatty Acid Metabolism(Acyl Carnitine)					0.003496	0.000602	8.33583e-09	-0.04295	0.008374	3.41253e-07	0.004135	0.000743	3.63609e-08	0.002139	0.001015	0.0356611	0.001462	0.00115	0.203683
57512	0.335966	0.142759	0.1138	0.158657	margaroylcarnitine (C17)*	Lipid	Fatty Acid Metabolism(Acyl Carnitine)	106182-29-0			HMDB06210	0.002891	0.00073	7.94995e-05	-0.04869	0.01018	1.93746e-06	0.003936	0.00092	2.15119e-05	0.000889	0.00119	0.455623	0.003541	0.001389	0.0108904
57513	0.515824	0.125595	0.01797	0.219929	arachidoylcarnitine (C20)*	Lipid	Fatty Acid Metabolism(Acyl Carnitine)				HMDB06460	0.003374	0.000704	1.92074e-06	-0.05363	0.009933	8.091e-08	0.004609	0.000868	1.44528e-07	0.00104	0.001248	0.405558	0.004389	0.001349	0.00116685
57514	0.362811	0.12354	0.05357	0.226888	behenoylcarnitine (C22)*	Lipid	Fatty Acid Metabolism(Acyl Carnitine)					0.000357	0.001085	0.74187	-0.01798	0.01516	0.235937	0.001134	0.001292	0.380579	-0.00175	0.002001	0.381247	0.003248	0.002109	0.123692
57515	0.631621	0.111325	0.00102	0.262598	lignoceroylcarnitine (C24)*	Lipid	Fatty Acid Metabolism(Acyl Carnitine)					0.000472	0.00067	0.481152	-0.0083	0.00931	0.373004	0.00126	0.000792	0.111968	-0.00153	0.001227	0.212682	0.003444	0.001262	0.00644131
57516	0.548026	0.12312	0.0001372	0.371815	cerotoylcarnitine (C26)*	Lipid	Fatty Acid Metabolism(Acyl Carnitine)				HMDB06347	0.00179	0.000605	0.00315965	-0.09032	0.008416	1.05487e-25	0.002846	0.000731	0.0001061	-0.00053	0.001082	0.625538	0.004089	0.001084	0.000167561
57517	0.562396	0.124442	6.847e-05	0.444034	ximenoylcarnitine (C26:1)*	Lipid	Fatty Acid Metabolism(Acyl Carnitine)					0.003325	0.000578	1.11145e-08	-0.05753	0.008023	1.32718e-12	0.004234	0.0007	2.29499e-09	0.001096	0.001022	0.284183	0.002849	0.001054	0.00691485
57518	0.848711	0.10503	7.061e-09	0.588527	arachidonoylcarnitine (C20:4)	Lipid	Fatty Acid Metabolism(Acyl Carnitine)					0.001492	0.000702	0.0338896	-0.1225	0.009656	1.18061e-34	0.001947	0.000848	0.0218973	0.000407	0.001257	0.74593	0.001697	0.001258	0.177522
57519	0.319877	0.122746	0.5	0.101729	eicosenoylcarnitine (C20:1)*	Lipid	Fatty Acid Metabolism(Acyl Carnitine)					0.005659	0.000603	3.91197e-20	-0.03696	0.00851	1.52572e-05	0.006329	0.000736	5.15209e-17	0.004018	0.001056	0.000165214	0.001934	0.001179	0.101283
57520	0.51179	0.128257	0.02363	0.248719	dihomo-linoleoylcarnitine (C20:2)*	Lipid	Fatty Acid Metabolism(Acyl Carnitine)					0.003425	0.00073	3.08635e-06	-0.08091	0.01019	4.69715e-15	0.003169	0.000909	0.000514806	0.003479	0.001221	0.00461904	-0.0009	0.001398	0.520621
57521	0.739657	0.112325	5.051e-09	0.56096	dihomo-linolenoylcarnitine (20:3n3 or 6)*	Lipid	Fatty Acid Metabolism(Acyl Carnitine)					0.000892	0.000639	0.163309	-0.09924	0.008851	8.48503e-28	0.001699	0.00076	0.025585	-0.00121	0.001183	0.308487	0.002954	0.001162	0.0111077
57528				0.450358	adrenoylcarnitine (C22:4)*	Lipid	Fatty Acid Metabolism(Acyl Carnitine)					0.001764	0.00126	0.16171	-0.1611	0.01744	1.16714e-19	0.000558	0.001492	0.70841	0.004208	0.002362	0.0755764	-0.00291	0.00234	0.213361
57531	0.235105	0.140018	0.5	0	nervonoylcarnitine (C24:1)*	Lipid	Fatty Acid Metabolism(Acyl Carnitine)					0.00382	0.000649	5.25651e-09	-0.02092	0.009262	0.0240724	0.004992	0.000821	1.96754e-09	0.000927	0.001114	0.406248	0.003565	0.001291	0.00582315
57547	0.247554	0.121441	0.1236	0.178358	2,3-dihydroxy-2-methylbutyrate	Amino Acid	Leucine, Isoleucine and Valine Metabolism	14868-24-7	301941		HMDB29576	0.006842	0.001795	0.000145947	-0.09941	0.02508	7.83541e-05	0.008808	0.002202	6.93531e-05	0.004209	0.003139	0.180816	0.004158	0.003495	0.234281
57554	0.387268	0.126122	0.00643	0.357619	2'-O-methylcytidine	Nucleotide	Pyrimidine Metabolism, Cytidine containing	2140-72-9	150971			0.000341	0.000382	0.372264	-0.01423	0.005293	0.00726916	0.000118	0.000462	0.798176	0.000914	0.000695	0.189683	-0.00116	0.000726	0.109865
57564	0.542409	0.123409	0.0002601	0.518985	perfluorooctanesulfonic acid (PFOS)	Xenobiotics	Chemical	1763-23-1	74483	C18142	HMDB59586	0.01126	0.001249	7.88682e-19	-0.1558	0.01758	2.83177e-18	0.01339	0.001504	3.55036e-18	0.007102	0.002209	0.0014141	0.005094	0.00188	0.00678377
57577	0.348426	0.121672	0.5	0.0518259	isoursodeoxycholate	Lipid	Secondary Bile Acid Metabolism	78919-26-3	127601	C17662	HMDB00686	-0.00078	0.002057	0.703285	0.05471	0.02924	0.0615965	0.001767	0.002482	0.476711	-0.00578	0.003678	0.117101	0.008421	0.003989	0.0349253
57591	0.5321	0.121074	2.233e-05	0.29087	beta-cryptoxanthin	Cofactors and Vitamins	Vitamin A Metabolism	472-70-8	6384256		HMDB33844	0.000339	0.001305	0.795014	0.03802	0.01813	0.0362292	0.002244	0.001621	0.166655	-0.00349	0.002186	0.111107	0.004406	0.002411	0.0677942
57595	0.332593	0.127155	0.009817	0.239982	glycosyl ceramide (d18:1/20:0, d16:1/22:0)*	Lipid	Ceramides					0.002468	0.000531	3.74634e-06	0.04305	0.007333	5.67405e-09	0.003339	0.00064	2.28731e-07	0.000178	0.000926	0.847503	0.00306	0.000948	0.00127169
57635	0.683119	0.109913	2.293e-05	0.451384	carotene diol (1)	Cofactors and Vitamins	Vitamin A Metabolism					0.003173	0.00084	0.000165822	0.02944	0.01172	0.0121482	0.004481	0.001021	1.29061e-05	0.000457	0.001476	0.756718	0.00467	0.001545	0.00253963
57636	0.630041	0.115085	1.57e-07	0.574017	carotene diol (2)	Cofactors and Vitamins	Vitamin A Metabolism					0.00377	0.000904	3.29659e-05	0.04934	0.01259	9.37655e-05	0.004654	0.001098	2.53618e-05	0.002119	0.001587	0.182632	0.00233	0.001686	0.167237
57637	0.53277	0.124051	0.0001771	0.41705	carotene diol (3)	Cofactors and Vitamins	Vitamin A Metabolism					-0.00128	0.001135	0.258618	-0.00111	0.01596	0.944791	0.00083	0.001421	0.559161	-0.00589	0.001884	0.0019169	0.00558	0.00221	0.0116738
57652	0.28545	0.122965	0.02608	0.347357	hexadecadienoate (16:2n6)	Lipid	Polyunsaturated Fatty Acid (n3 and n6)	28290-73-5			HMDB00477	0.002294	0.00085	0.00705616	0.1428	0.01189	2.14824e-31	0.002542	0.001051	0.0158136	0.002265	0.001436	0.115533	2.6e-05	0.001661	0.987394
57655	0.031832	0.119698	0.4882	0.0520009	2'-O-methyluridine	Nucleotide	Pyrimidine Metabolism, Uracil containing	2140-76-3	102212			-0.00068	0.000709	0.340603	-0.05056	0.009846	3.28156e-07	-0.00119	0.000861	0.165949	0.000218	0.001241	0.860741	-0.00137	0.001377	0.318493
57658	0.476546	0.122101	0.0001336	0.462711	heneicosapentaenoate (21:5n3)	Lipid	Polyunsaturated Fatty Acid (n3 and n6)	24257-10-1	11998573			0.01546	0.002607	4.05796e-09	0.1618	0.03656	1.05394e-05	0.01781	0.003272	7.02367e-08	0.01164	0.004197	0.00581713	0.002232	0.004795	0.64168
57664	0.27624	0.118869	0.1646	0.204793	N-oleoylserine	Lipid	Endocannabinoid					0.001979	0.000926	0.0328877	0.05131	0.01286	6.99115e-05	0.002068	0.001127	0.0667775	0.001906	0.001604	0.235484	-0.00074	0.001807	0.6832
57687	0.879874	0.092274	2.602e-11	0.728364	N-trimethyl 5-aminovalerate	Amino Acid	Lysine Metabolism					0.002985	0.000732	4.80877e-05	0.04377	0.01011	1.62831e-05	0.003418	0.000905	0.000171033	0.002602	0.001222	0.0339864	0.002697	0.001297	0.0378067
57711	0.393597	0.12492	0.01564	0.281955	HWESASXX*	Peptide	Polypeptide					-0.00112	0.002102	0.595249	0.01586	0.02938	0.589485	-0.00017	0.002581	0.948873	-0.00291	0.003652	0.426505	-0.00041	0.004042	0.919931
57714	0.446263	0.118101	0.0009427	0.409875	X - 24947	Unknown						-0.00624	0.001971	0.00157064	-0.182	0.02748	5.32096e-11	-0.00743	0.002414	0.00215426	-0.00392	0.003361	0.244088	-0.00579	0.00345	0.093744
57715	0.680494	0.099186	1.169e-08	0.646075	X - 24948	Unknown						-0.00763	0.001045	5.23865e-13	-0.2693	0.01455	2.36988e-67	-0.00771	0.001368	2.40168e-08	-0.00834	0.001478	3.38225e-08	0.000378	0.00185	0.838154
57716	0.590952	0.114563	0.03238	0.272068	X - 24949	Unknown						0.000664	0.001318	0.614332	0.003121	0.01845	0.865712	-0.00079	0.001616	0.626192	0.002896	0.002283	0.20537	-0.00479	0.002495	0.055183
57718	0.625681	0.122185	0.001961	0.29594	X - 24951	Unknown						-0.00473	0.001122	2.69087e-05	-0.1201	0.0157	4.10621e-14	-0.00509	0.001382	0.000245824	-0.00474	0.001913	0.0136806	0.000246	0.002146	0.908907
57719	0.22765	0.120204	0.05316	0.175527	X - 24952	Unknown						-0.00048	0.000656	0.468318	0.008884	0.009177	0.333166	-0.00071	0.000795	0.374162	0.000227	0.001168	0.846002	-0.00078	0.001314	0.554382
57720	0.244016	0.121536	0.04258	0.219187	X - 24953	Unknown						-0.00461	0.002249	0.0406523	-0.1953	0.03153	7.95465e-10	-0.0045	0.002725	0.099345	-0.00541	0.003968	0.173506	0.001683	0.004228	0.690688
57741	0.536408	0.116027	0.006145	0.453058	glycocholenate sulfate*	Lipid	Secondary Bile Acid Metabolism					0.000395	0.000786	0.615691	-0.0682	0.011	7.84749e-10	-3e-05	0.000974	0.972392	0.001115	0.001305	0.393625	-0.00105	0.001442	0.464729
57745	0.308835	0.123331	0.01221	0.228148	phenylacetate	Amino Acid	Phenylalanine Metabolism	103-82-2	999	C07086	HMDB00209	0.00587	0.001686	0.000518507	0.1457	0.02364	9.83925e-10	0.004313	0.002069	0.0374045	0.009977	0.002966	0.00085602	-0.00552	0.003246	0.0892419
57746	0.516996	0.113526	0.4476	0.219756	anthranilate	Amino Acid	Tryptophan Metabolism	118-92-3	227	C00108	HMDB01123	0.005676	0.001803	0.00168582	0.05451	0.02517	0.0305609	0.004464	0.002203	0.0431046	0.007627	0.00316	0.0162925	-0.0056	0.003527	0.112849
57747	0.365625	0.123019	0.003904	0.359997	3-methylglutaconate	Amino Acid	Leucine, Isoleucine and Valine Metabolism	5746-90-7	1551553		HMDB00522	0.003983	0.000768	2.57232e-07	0.06555	0.01078	1.63648e-09	0.004432	0.000985	7.79836e-06	0.003996	0.00117	0.000705118	0.000522	0.001379	0.704804
57754	0.453702	0.110447	4.389e-07	0.42927	X - 24970	Unknown						-0.00205	0.001449	0.157872	-0.01617	0.02027	0.425106	-0.00121	0.001786	0.498145	-0.00322	0.002458	0.190365	0.001391	0.002901	0.631721
57756	0.118931	0.108933	0.2368	0.110148	X - 24972	Unknown						-0.01142	0.002204	2.60478e-07	0.3006	0.03086	1.30445e-21	-0.01257	0.002733	5.01741e-06	-0.008	0.003758	0.0338827	-0.00356	0.004292	0.406815
57783	0.388586	0.119425	0.0008023	0.497606	1H-indole-7-acetic acid	Xenobiotics	Bacterial/Fungal	39689-63-9				0.0054	0.001894	0.00443687	-0.00249	0.02648	0.92508	0.003618	0.002285	0.11373	0.008651	0.003361	0.0104479	-0.00574	0.003562	0.107515
57810	0.185902	0.129262	0.1835	0.184482	nisinate (24:6n3)	Lipid	Polyunsaturated Fatty Acid (n3 and n6)	68378-49-4	11792612		HMDB02007	0.001277	0.001792	0.476295	-0.03845	0.02561	0.133487	0.004003	0.002235	0.0737371	-0.00597	0.003147	0.0586048	0.006401	0.003508	0.0682614
57814	0.260855	0.118774	0.1323	0.125475	(N(1) + N(8))-acetylspermidine	Amino Acid	Polyamine Metabolism					0.005415	0.000908	3.31006e-09	-0.07787	0.0126	8.86169e-10	0.004693	0.001146	4.67966e-05	0.007485	0.001446	3.70967e-07	-0.001	0.001747	0.567663
57839	0.689062	0.089441	1.61e-14	0.745445	X - 24983	Unknown						0.006276	0.001037	1.89299e-09	-0.01349	0.01423	0.343506	0.006863	0.001268	8.13524e-08	0.00589	0.001869	0.00174968	0.003789	0.001624	0.019778
58	0.716633	0.110017	1.911e-06	0.589	glycine	Amino Acid	Glycine, Serine and Threonine Metabolism	56-40-6	750	C00037	HMDB00123	0.000418	0.000485	0.388797	0.0844	0.006739	7.01937e-34	0.001021	0.000647	0.115177	-0.00042	0.000623	0.501433	0.00136	0.000816	0.0958819
587	0.103582	0.108822	0.5	0.0213716	gluconate	Xenobiotics	Food Component/Plant	527-07-1	10690	C00257	HMDB00625	0.003367	0.000537	5.48975e-10	0.08196	0.007603	6.951e-26	0.00341	0.000629	8.31806e-08	0.002892	0.000991	0.00373589	0.001239	0.001039	0.233365
59	0.306264	0.113049	0.002645	0.283	histidine	Amino Acid	Histidine Metabolism	5934-29-2	6274	C00135	HMDB00177	-0.00109	0.000231	2.77741e-06	-0.00633	0.003222	0.0497298	-0.00133	0.000279	2.29814e-06	-0.00067	0.000411	0.105911	-0.00084	0.000443	0.0589854
590	0.2077	0.120156	0.08047	0.245609	hypotaurine	Amino Acid	Methionine, Cysteine, SAM and Taurine Metabolism	300-84-5	107812	C00519	HMDB00965	0.006496	0.001205	8.62728e-08	-0.05688	0.01692	0.000798695	0.005633	0.001461	0.000124843	0.00856	0.002169	9.54246e-05	-0.00237	0.002307	0.304117
594	0.125382	0.102856	0.2855	0.108299	nicotinamide	Cofactors and Vitamins	Nicotinate and Nicotinamide Metabolism	98-92-0	936	C00153	HMDB01406	-0.00423	0.000813	2.30329e-07	-0.06678	0.01141	6.32079e-09	-0.00448	0.000948	2.67851e-06	-0.00355	0.001598	0.0270986	-0.00012	0.001604	0.939969
598	0.524401	0.13055	0.0003131	0.449792	phytanate	Xenobiotics	Food Component/Plant	14721-66-5	26840	C01607	HMDB00801	0.00219	0.000865	0.0114625	-0.03191	0.01201	0.00798925	0.00295	0.00103	0.00429053	0.000978	0.001591	0.539096	0.002607	0.001668	0.118197
5983	0.578115	0.119788	5.111e-06	0.504074	corticosterone	Lipid	Corticosteroids	50-22-6	5753	C02140	HMDB01547	0.000367	0.001634	0.822425	0.05625	0.02263	0.0130581	9.6e-05	0.002016	0.962163	0.001004	0.002811	0.721255	-0.00146	0.003144	0.641966
60	0.501692	0.125121	0.0003802	0.337	leucine	Amino Acid	Leucine, Isoleucine and Valine Metabolism	61-90-5	6106	C00123	HMDB00687	-0.00059	0.000244	0.0155661	-0.07127	0.003405	1.08055e-82	-0.00043	0.000302	0.15528	-0.00101	0.000419	0.0162401	0.000628	0.000464	0.175903
601	0.289406	0.112622	0.05945	0.210135	dihydroorotate	Nucleotide	Pyrimidine Metabolism, Orotate containing	155-54-4	648	C00337	HMDB03349	0.001399	0.000858	0.103379	-0.04993	0.01193	3.06431e-05	0.00232	0.001056	0.0282896	-0.00029	0.00149	0.843326	0.002451	0.001632	0.133215
605	0.508525	0.121639	0.5	0.11318	uracil	Nucleotide	Pyrimidine Metabolism, Uracil containing	66-22-8	1174	C00106	HMDB00300	-0.0004	0.000817	0.620818	-0.04543	0.01137	6.87184e-05	0.000565	0.001002	0.57304	-0.00235	0.001397	0.0929352	0.003341	0.001598	0.0367214
606	0.359954	0.127411	0.007546	0.229595	uridine	Nucleotide	Pyrimidine Metabolism, Uracil containing	58-96-8	6029	C00299	HMDB00296	-0.00089	0.000367	0.0155531	-0.01374	0.005129	0.00748637	-0.00033	0.000438	0.45561	-0.0021	0.000668	0.00178563	0.001986	0.000706	0.00496173
607	0.488728	0.114259	0.5	0.14917	trans-urocanate	Amino Acid	Histidine Metabolism	104-98-3	736715	C00785	HMDB00301	-0.00046	0.000909	0.611661	0.03519	0.0127	0.00568646	-0.00039	0.001148	0.735227	-0.00087	0.001499	0.563162	0.000596	0.001766	0.735893
6146	0.026073	0.10788	0.4853	0.0920443	2-aminoadipate	Amino Acid	Lysine Metabolism	542-32-5;1118-90-7	469	C00956	HMDB00510	-0.00063	0.001277	0.622863	-0.1436	0.01806	4.24369e-15	-0.00106	0.001579	0.501573	0.000607	0.002192	0.781826	-0.00277	0.002374	0.243118
61505	0.309053	0.122399	0.01571	0.351394	1-cerotoyl-GPC (26:0)*	Lipid	Lysophospholipid				HMDB29205	-0.0025	0.0012	0.0377077	-0.00142	0.01677	0.932534	-0.00315	0.001471	0.0327385	-0.00089	0.002091	0.670222	-0.00261	0.002336	0.264515
61702	0.461974	0.127988	0.0006875	0.495366	2-hydroxyphytanate*	Lipid	Fatty Acid, Monohydroxy	14721-68-7	189026			0.000297	0.000887	0.73833	0.001803	0.01219	0.882456	0.001176	0.001082	0.27756	-0.00113	0.001557	0.469798	0.003042	0.001645	0.0646062
61769				0.247861	5-dodecenoylcarnitine (C12:1)	Lipid	Fatty Acid Metabolism(Acyl Carnitine)					0.004399	0.000773	1.67881e-08	0.03355	0.01078	0.00190515	0.005391	0.000922	7.67729e-09	0.002031	0.001385	0.143301	0.002659	0.001478	0.0722664
61833	0.527621	0.118457	8.306e-05	0.420886	5,6-dihydrouridine	Nucleotide	Pyrimidine Metabolism, Uracil containing	1361384	94312			0.002518	0.000415	1.80315e-09	0.02426	0.00575	2.64969e-05	0.002973	0.000525	2.04645e-08	0.001488	0.000649	0.0224363	0.001153	0.000758	0.128507
61843	0.077473	0.134257	0.5	0	3-hydroxyoleate*	Lipid	Fatty Acid, Monohydroxy					0.00352	0.000958	0.000253339	0.0236	0.01353	0.0812626	0.003494	0.00115	0.00248818	0.003707	0.001784	0.0384031	-0.00042	0.001899	0.823201
61846	0.265397	0.117453	0.03517	0.141837	androsterone glucuronide	Lipid	Androgenic Steroids	1852-43-3	114833	C11135	HMDB02829	-0.01328	0.001876	2.58883e-12	-0.367	0.02633	5.52862e-41	-0.01503	0.002323	1.71799e-10	-0.00989	0.003178	0.00200388	-0.0031	0.003384	0.359369
61858	0.25159	0.11952	0.06976	0.264524	ribulonate/xylulonate*	Carbohydrate	Pentose Metabolism					0.004884	0.000758	1.75946e-10	0.02336	0.01064	0.0283974	0.005262	0.000925	1.87676e-08	0.004114	0.001305	0.00177052	0.00093	0.001466	0.525951
61861	0.321349	0.121094	0.01769	0.329262	octadecenedioate (C18:1-DC)*	Lipid	Fatty Acid, Dicarboxylate					0.003204	0.000891	0.000336567	-0.02234	0.01241	0.0720643	0.003529	0.00111	0.00153352	0.00256	0.00148	0.0845663	1.2e-05	0.001694	0.994572
61862	0.691685	0.107281	0.5	0.300372	hexadecenedioate (C16:1-DC)*	Lipid	Fatty Acid, Dicarboxylate					0.00113	0.001005	0.261397	-0.03209	0.01395	0.0215696	0.001123	0.00124	0.365442	0.000834	0.001724	0.628957	-0.0011	0.001945	0.571977
61865	0.552252	0.117449	0.003803	0.34668	octadecenedioylcarnitine (C18:1-DC)*	Lipid	Fatty Acid Metabolism(Acyl Carnitine)	251981-06-3				0.006399	0.001019	4.79883e-10	-0.04871	0.0142	0.000621931	0.006793	0.001225	3.99815e-08	0.004947	0.001819	0.00684487	0.001758	0.001935	0.363705
61866	0.140386	0.120825	0.393	0.0576238	heptenedioate (C7:1-DC)*	Lipid	Fatty Acid, Dicarboxylate					0.004607	0.000841	5.36862e-08	-0.00576	0.01183	0.626655	0.004576	0.00102	8.41708e-06	0.004019	0.00152	0.00856375	0.001572	0.001634	0.336025
61867	0.372019	0.124451	0.007044	0.288441	octadecanedioylcarnitine (C18-DC)*	Lipid	Fatty Acid Metabolism(Acyl Carnitine)	123233-50-1				0.005043	0.000994	4.5997e-07	-0.06507	0.01385	2.95027e-06	0.005614	0.001208	3.95645e-06	0.003325	0.001735	0.0560571	0.002555	0.001875	0.173164
61868	0.645801	0.105992	7.115e-06	0.449513	1-ribosyl-imidazoleacetate*	Amino Acid	Histidine Metabolism	29605-99-0	5117448	C05131	HMDB02331	0.004498	0.000684	7.34616e-11	-0.0708	0.009553	2.35238e-13	0.004921	0.000827	3.91755e-09	0.004024	0.001195	0.000835623	0.000971	0.001238	0.433058
61871	0.166116	0.118547	0.2341	0.194159	3-carboxy-4-methyl-5-pentyl-2-furanpropionate (3-Cmpfp)**	Lipid	Fatty Acid, Dicarboxylate		194501			0.002276	0.000729	0.0018504	0.01473	0.01025	0.15076	0.002647	0.000904	0.00350113	0.001446	0.001245	0.246196	0.001319	0.001405	0.348054
61881	0.140075	0.114811	0.2056	0.122243	glucuronide of C10H18O2 (1)*	Partially Characterized Molecules	Partially Characterized Molecules					0.003774	0.001567	0.0161723	-0.06029	0.0219	0.00599167	0.004787	0.001854	0.0100349	0.002843	0.002948	0.335619	0.002359	0.003089	0.44529
61887	0.178076	0.117976	0.1371	0.179953	glucuronide of C10H18O2 (7)*	Partially Characterized Molecules	Partially Characterized Molecules					0.009885	0.002156	5.07859e-06	-0.05206	0.03014	0.0844537	0.01083	0.002639	4.5352e-05	0.009383	0.003792	0.0138226	0.001007	0.004225	0.81169
61970	0.403561	0.118094	0.002488	0.243586	glucuronide of C14H22O4 (2)*	Partially Characterized Molecules	Partially Characterized Molecules					0.002908	0.001771	0.100932	-0.1083	0.0247	1.26094e-05	0.004971	0.00209	0.0176415	-0.00077	0.00327	0.814136	0.007837	0.003365	0.0200074
62059	0.426402	0.119451	0.001943	0.258528	N-acetyl-2-aminooctanoate*	Lipid	Fatty Acid, Amino		95555		HMDB59745	0.002711	0.000911	0.00298681	-0.1451	0.01269	9.30183e-29	0.002359	0.001134	0.0379037	0.003801	0.001531	0.0135306	-0.00011	0.001745	0.947494
62060	0.586847	0.111219	0.0003962	0.38908	hydroxyasparagine**	Amino Acid	Alanine and Aspartate Metabolism					0.005251	0.000368	1.06489e-42	0.01412	0.005102	0.00573868	0.005712	0.000465	5.83765e-32	0.004607	0.000583	3.14022e-14	0.001164	0.000653	0.0746314
62062	0.222264	0.121116	0.07538	0.240888	3-hydroxystachydrine*	Xenobiotics	Food Component/Plant		442640			0.01824	0.003928	3.84791e-06	-0.07832	0.05485	0.153609	0.02347	0.004714	7.98549e-07	0.006703	0.007165	0.350153	0.01408	0.007695	0.0675754
62064	0.481562	0.129347	0.008997	0.310806	3-hydroxybutyroylglycine**	Lipid	Fatty Acid Metabolism(Acyl Glycine)					0.006522	0.001255	2.37901e-07	0.2016	0.01749	3.41375e-29	0.007863	0.001551	4.95477e-07	0.003719	0.002173	0.0878895	0.001706	0.002394	0.476322
62065	0.250449	0.126518	0.5	0.0802644	glyco-alpha-muricholate**	Lipid	Primary Bile Acid Metabolism					0.000426	0.001782	0.811102	-0.01361	0.02523	0.589779	-0.001	0.00215	0.643611	0.003379	0.003161	0.285795	-0.00572	0.003489	0.101425
62066	0.277976	0.121408	0.03201	0.284557	glyco-beta-muricholate**	Lipid	Primary Bile Acid Metabolism					0.005899	0.002151	0.00620924	0.08786	0.03036	0.00387483	0.004676	0.002655	0.0786587	0.008014	0.003715	0.0316475	-0.00636	0.00414	0.124835
62068	0.330624	0.121692	0.1694	0.249018	N-methylhydroxyproline**	Amino Acid	Urea cycle; Arginine and Proline Metabolism					0.01272	0.002114	2.41252e-09	0.02658	0.0295	0.36782	0.01557	0.002493	7.09957e-10	0.007764	0.004002	0.0531551	0.007823	0.004149	0.059599
62069	0.081528	0.118053	0.5	0	3-hydroxyadipate*	Lipid	Fatty Acid, Dicarboxylate		151913		HMDB00345	0.004981	0.00159	0.00178427	-0.02318	0.02272	0.30784	0.001887	0.001962	0.336507	0.01081	0.002762	0.000108633	-0.00454	0.002968	0.126445
62071	0.420016	0.121612	0.04592	0.357334	perfluorooctanoate (PFOA)*	Xenobiotics	Chemical		9554		HMDB59587	0.003735	0.000941	7.59298e-05	-0.02136	0.01332	0.109134	0.006485	0.001215	1.24016e-07	-0.00204	0.001364	0.134859	0.006295	0.001451	1.49133e-05
62101	0.337894	0.121707	0.05983	0.148191	alpha-ketoglutaramate**	Amino Acid	Glutamate Metabolism	18465-19-5				0.001502	0.000406	0.00022318	-0.0435	0.005676	3.78694e-14	0.002081	0.00048	1.65182e-05	0.000259	0.000746	0.728999	0.001336	0.000781	0.0874843
62103				0.41842	cysteinylglycine disulfide*	Amino Acid	Glutathione Metabolism	70555-24-7			HMDB00709	0.001149	0.000457	0.0119659	-0.02814	0.006293	8.57115e-06	0.002159	0.000553	0.000103772	-0.00094	0.000808	0.247705	0.002979	0.000885	0.000782404
62104	0.546901	0.109161	0.05143	0.251428	gamma-glutamylcitrulline*	Peptide	Gamma-glutamyl Amino Acid					0.002607	0.000644	5.54844e-05	0.008514	0.009012	0.344977	0.0035	0.000784	9.21866e-06	0.000401	0.00114	0.725178	0.003136	0.001225	0.0105501
62145	0.417169	0.119433	0.004151	0.282021	glycine conjugate of C10H12O2*	Partially Characterized Molecules	Partially Characterized Molecules					0.005312	0.001494	0.000394505	-0.01105	0.02089	0.596874	0.008665	0.001826	2.46667e-06	-0.00125	0.0026	0.631039	0.007819	0.002885	0.00679922
62146	0.231614	0.126584	0.08327	0.104947	glycine conjugate of C10H14O2 (1)*	Partially Characterized Molecules	Partially Characterized Molecules					0.004562	0.001343	0.000704659	-0.02759	0.01884	0.143332	0.006652	0.001665	7.06913e-05	0.000472	0.00228	0.836025	0.004995	0.002629	0.0575716
62151	0.253012	0.130923	0.5	0.0052589	X - 25172	Unknown						-0.00384	0.004506	0.394605	0.01841	0.06374	0.772788	0.000186	0.005443	0.972715	-0.01268	0.008225	0.123991	0.009754	0.008674	0.260989
62152	0.593584	0.129809	0.006938	0.235741	sphingomyelin (d17:1/14:0, d16:1/15:0)*	Lipid	Sphingolipid Metabolism					0.00204	0.000671	0.00241454	0.155	0.009362	1.57173e-55	0.003471	0.000835	3.6066e-05	-0.00093	0.001092	0.397249	0.00519	0.001262	4.09745e-05
63	0.212586	0.119649	0.08803	0.237	cholesterol	Lipid	Sterol	57-88-5	11025495	C00187	HMDB00067	0.000744	0.000376	0.0480923	0.04147	0.00527	8.31576e-15	0.001717	0.000449	0.000143663	-0.00128	0.000684	0.0614082	0.003113	0.000714	1.40471e-05
64	0.521725	0.127563	0.0415	0.388	phenylalanine	Amino Acid	Phenylalanine Metabolism	63-91-2	6140	C00079	HMDB00159	0.000423	0.000205	0.0395465	-0.02706	0.002843	9.64371e-21	0.000537	0.000256	0.0360607	0.000311	0.000344	0.367649	0.000373	0.00039	0.339127

## Sheet: Legend
compID	Compound ID
h2	Heritability
SE_h2	Heritability standard error
p_h2	Heritability P-value
BIOCHEMICAL	Biochemical name
SUPER.PATHWAY	Super pathway name
SUB.PATHWAY	Sub pathway name
CAS	Cas name
PUBCHEM	PUBCHEM ID
KEGG	KEGG ID
HMDB	HMDB ID
B_age	Beta: Age
SE_age	Standard error: Age
p_age	P-value: Age
B_sex	Beta: Sex
SE_sex	Standard error: Sex
p_sex	P-value: Sex
B_age_F	Beta: Age in women
SE_age_F	Standard error: Age in women
p_age_F	P-value: Age in women
B_age_M	Beta: Age in men
SE_age_M	Standard error: Age in men
p_age_M	P-value: Age in men
B_age_BySex	Beta: Age-by-sex
SE_age_BySex	Standard error: Age-by-sex
p_age_BySex	P-value: Age-by-sex
