# Supplementary material for: Longitudinal plasma metabolomics of aging and sex
Source: Aging (Albany NY). 2019 Feb 24;11(4):1262–82. doi: 10.18632/aging.101837 (PMC6402508; doi:10.18632/aging.101837)
Supplement: Supplementary Table S2 [file aging-11-101837-s004.xlsx]

## Sheet: Results
compID	BIOCHEMICAL	SUPER.PATHWAY	SUB.PATHWAY	HMDB	B_age	p_age	Menni2013_B_age	Menni2013_p_age
33971	10-heptadecenoate (17:1n7)	Lipid	Long Chain Fatty Acid	HMDB60038	0.003546	4.44112e-05	0.015	1.05e-43
33972	10-nonadecenoate (19:1n9)	Lipid	Long Chain Fatty Acid	HMDB13622	0.003246	7.32203e-05	0.013	3.36e-31
35675	2-hydroxypalmitate	Lipid	Fatty Acid, Monohydroxy	HMDB31057	0.001472	0.000116743	0.009	4.55e-19
31787	3-carboxy-4-methyl-5-propyl-2-furanpropanoate (CMPF)	Lipid	Fatty Acid, Dicarboxylate	HMDB61112	0.01949	2.710535e-15	0.026	3.21e-137
542	3-hydroxybutyrate (BHBA)	Lipid	Ketone Bodies	HMDB00357	0.00449	0.0013181033	0.011	1.55e-23
15676	3-methyl-2-oxovalerate	Amino Acid	Leucine, Isoleucine and Valine Metabolism	HMDB03736	-0.00136	0.0005511665	-0.005	1.81e-05
1558	4-acetamidobutanoate	Amino Acid	Polyamine Metabolism	HMDB03681	0.005257	1.013741e-12	0.015	1.11e-43
22116	4-methyl-2-oxopentanoate	Amino Acid	Leucine, Isoleucine and Valine Metabolism	HMDB00695	-0.00177	8.1470703e-06	-0.006	6.52e-07
33968	5-dodecenoate (12:1n7)	Lipid	Medium Chain Fatty Acid	HMDB00529	0.002254	0.016374158	0.009	1.1e-15
36776	7-alpha-hydroxy-3-oxo-4-cholestenoate (7-Hoca)	Lipid	Sterol	HMDB12458	0.002036	3.70493e-05	0.007	2.34e-12
1107	allantoin	Nucleotide	Purine Metabolism, (Hypo)Xanthine/Inosine containing	HMDB00462	0.001239	9.6497674e-06	0.013	4.41e-37
528	alpha-ketoglutarate	Energy	TCA Cycle	HMDB00208	0.001493	0.0182976722	0.011	4.01e-31
1561	alpha-tocopherol	Cofactors and Vitamins	Tocopherol Metabolism	HMDB01893	0.002039	4.7582293e-06	0.018	6.72e-61
31591	androsterone sulfate	Lipid	Androgenic Steroids	HMDB02759	-0.01478	9.798839e-16	-0.023	2.63e-94
575	arabinose	Carbohydrate	Pentose Metabolism	HMDB00646	0.003755	0.0052040678	0.017	3.76e-70
2137	biliverdin	Cofactors and Vitamins	Hemoglobin and Porphyrin Metabolism	HMDB01008	0.003442	1.35018e-05	0.01	5.51e-25
1642	caprate (10:0)	Lipid	Medium Chain Fatty Acid	HMDB00511	0.001861	0.0103894516	0.012	6.59e-29
1564	citrate	Energy	TCA Cycle	HMDB00094	0.001816	8.180952e-15	0.019	9.97e-93
2132	citrulline	Amino Acid	Urea cycle; Arginine and Proline Metabolism	HMDB00904	0.001662	2.3988762e-06	0.025	1.06e-115
17805	dihomo-linoleate (20:2n6)	Lipid	Polyunsaturated Fatty Acid (n3 and n6)	HMDB05060	0.00262	0.0007340683	0.005	3.28e-06
36808	dimethylarginine (SDMA + ADMA)	Amino Acid	Urea cycle; Arginine and Proline Metabolism	HMDB01539	0.001661	1.29369e-05	-0.005	1.18e-08
44675	docosahexaenoate (DHA; 22:6n3)	Lipid	Polyunsaturated Fatty Acid (n3 and n6)	HMDB02183	0.006017	4.472609e-10	0.016	2.23e-55
32504	docosapentaenoate (n3 DPA; 22:5n3)	Lipid	Polyunsaturated Fatty Acid (n3 and n6)	HMDB06528	0.004601	2.1987817e-06	0.018	3.02e-61
18467	eicosapentaenoate (EPA; 20:5n3)	Lipid	Polyunsaturated Fatty Acid (n3 and n6)	HMDB01999	0.005261	1.49745e-05	0.019	1.6e-71
33973	epiandrosterone sulfate	Lipid	Androgenic Steroids		-0.01382	2.510614e-14	-0.021	6.67e-85
20699	erythritol	Xenobiotics	Food Component/Plant	HMDB02994	0.004834	9.6275804e-09	0.023	2.35e-123
42420	erythronate*	Carbohydrate	Aminosugar Metabolism	HMDB00613	0.003301	6.245928e-23	0.017	4.36e-73
18369	gamma-glutamylleucine	Peptide	Gamma-glutamyl Amino Acid	HMDB11171	0.001036	0.0117826719	0.015	4.95e-51
33422	gamma-glutamylphenylalanine	Peptide	Gamma-glutamyl Amino Acid	HMDB00594	0.00281	7.670778e-10	0.018	3.02e-73
2734	gamma-glutamyltyrosine	Peptide	Gamma-glutamyl Amino Acid	HMDB11741	0.002362	9.3321272e-06	0.022	8.52e-113
43829	gamma-glutamylvaline	Peptide	Gamma-glutamyl Amino Acid	HMDB11172	0.003786	5.1106782e-08	0.015	3.13e-48
48152	glucose	Carbohydrate	Glycolysis, Gluconeogenesis, and Pyruvate Metabolism	HMDB00122	0.000606	0.0030405722	0.017	8.78e-73
53	glutamine	Amino Acid	Glutamate Metabolism	HMDB00641	0.000528	0.0075039763	0.015	4.56e-48
1572	glycerate	Carbohydrate	Glycolysis, Gluconeogenesis, and Pyruvate Metabolism	HMDB00139	0.002387	2.0280124e-06	0.011	6.42e-30
15122	glycerol	Lipid	Glycerolipid Metabolism	HMDB00131	0.003218	2.5331934e-06	0.017	3.92e-75
15753	hippurate	Xenobiotics	Benzoate Metabolism	HMDB00714	0.005124	0.0003101231	0.015	5.62e-44
59	histidine	Amino Acid	Histidine Metabolism	HMDB00177	-0.00109	2.7774134e-06	-0.013	2.98e-36
15140	kynurenine	Amino Acid	Tryptophan Metabolism	HMDB00684	0.001525	0.0003302496	0.018	8.93e-78
60	leucine	Amino Acid	Leucine, Isoleucine and Valine Metabolism	HMDB00687	-0.00059	0.0155660553	0.009	1.31e-19
1105	linoleate (18:2n6)	Lipid	Polyunsaturated Fatty Acid (n3 and n6)	HMDB00673	0.002264	0.0006151937	0.008	5.08e-12
34035	linolenate [alpha or gamma; (18:3n3 or 6)]	Lipid	Polyunsaturated Fatty Acid (n3 and n6)	HMDB03073	0.003402	9.48464e-05	0.005	1.94e-06
1303	malate	Energy	TCA Cycle	HMDB00156	0.001796	1.7001246e-06	0.013	4.56e-45
48153	mannose	Carbohydrate	Fructose, Mannose and Galactose Metabolism	HMDB00169	0.000921	0.0122471443	0.015	1.2e-58
1121	margarate (17:0)	Lipid	Long Chain Fatty Acid	HMDB02259	0.003106	1.5632757e-06	0.014	2.85e-41
1124	myo-inositol	Lipid	Inositol Metabolism	HMDB00211	0.004965	9.023059e-12	0.023	3.87e-114
1365	myristate (14:0)	Lipid	Long Chain Fatty Acid	HMDB00806	0.002388	0.0011443981	0.014	2.25e-36
32418	myristoleate (14:1n5)	Lipid	Long Chain Fatty Acid	HMDB02000	0.002523	0.0061783049	0.01	2.63e-18
1585	N-acetylalanine	Amino Acid	Alanine and Aspartate Metabolism	HMDB00766	0.001982	7.046441e-12	0.017	5.8e-68
27710	N-acetylglycine	Amino Acid	Glycine, Serine and Threonine Metabolism	HMDB00532	0.002194	0.0146211062	0.014	7.64e-48
33939	N-acetylthreonine	Amino Acid	Glycine, Serine and Threonine Metabolism		0.002315	3.842443e-10	0.011	1e-27
15650	N1-methyladenosine	Nucleotide	Purine Metabolism, Adenine containing	HMDB03331	0.001742	2.3971585e-08	0.008	1.05e-14
1356	nonadecanoate (19:0)	Lipid	Long Chain Fatty Acid	HMDB00772	0.001664	0.0001671893	0.013	6.09e-35
1493	ornithine	Amino Acid	Urea cycle; Arginine and Proline Metabolism	HMDB03374	0.0016	1.88376e-05	0.013	1.37e-43
36103	p-cresol sulfate	Xenobiotics	Benzoate Metabolism	HMDB11635	0.004631	0.0007190616	0.015	1.35e-46
1336	palmitate (16:0)	Lipid	Long Chain Fatty Acid	HMDB00220	0.001802	0.0002550283	0.009	1.25e-15
33447	palmitoleate (16:1n7)	Lipid	Long Chain Fatty Acid	HMDB03229	0.003057	0.0030318456	0.01	2.38e-20
1508	pantothenate	Cofactors and Vitamins	Pantothenate and CoA Metabolism	HMDB00210	0.004123	5.1666519e-06	0.016	2.95e-59
1361	pentadecanoate (15:0)	Lipid	Long Chain Fatty Acid	HMDB00826	0.001899	0.0001005955	0.017	1.79e-67
35126	phenylacetylglutamine	Peptide	Acetylated Peptides	HMDB06344	0.006936	2.573969e-11	0.02	8.13e-89
33442	pseudouridine	Nucleotide	Pyrimidine Metabolism, Uracil containing	HMDB00767	0.002531	1.541918e-11	0.011	1.04e-27
31555	pyridoxate	Cofactors and Vitamins	Vitamin B6 Metabolism	HMDB00017	0.004809	0.0001582619	0.013	3.62e-38
1648	serine	Amino Acid	Glycine, Serine and Threonine Metabolism	HMDB00187	-0.00092	0.0085081869	0.007	3.55e-14
1358	stearate (18:0)	Lipid	Long Chain Fatty Acid	HMDB00827	0.001449	0.0001771625	0.009	2.77e-16
33969	stearidonate (18:4n3)	Lipid	Polyunsaturated Fatty Acid (n3 and n6)	HMDB06547	0.003948	0.0003657921	0.015	1.11e-45
18394	theophylline	Xenobiotics	Xanthine Metabolism	HMDB01889	-0.00579	0.0192366726	0.009	2.45e-17
27738	threonate	Cofactors and Vitamins	Ascorbate and Aldarate Metabolism	HMDB00943	0.002506	0.0007324872	0.009	4.84e-19
32306	trans-4-hydroxyproline	Amino Acid	Urea cycle; Arginine and Proline Metabolism	HMDB00725	0.001458	0.0111150315	0.007	3.01e-13
54	tryptophan	Amino Acid	Tryptophan Metabolism	HMDB00929	-0.00074	0.0063885214	0.004	3.77e-05
1299	tyrosine	Amino Acid	Tyrosine Metabolism	HMDB00158	0.000712	0.0253152712	0.017	1.29e-62
1604	urate	Nucleotide	Purine Metabolism, (Hypo)Xanthine/Inosine containing	HMDB00289	0.000955	0.0103208384	0.012	1.28e-32
1670	urea	Amino Acid	Urea cycle; Arginine and Proline Metabolism	HMDB00294	0.004105	2.291282e-19	0.021	4.78e-102
606	uridine	Nucleotide	Pyrimidine Metabolism, Uracil containing	HMDB00296	-0.00089	0.0155531421	0.008	6.65e-16

## Sheet: Legend
compID	Compound ID
BIOCHEMICAL	Biochemical name
SUPER.PATHWAY	Super pathway name
SUB.PATHWAY	Sub pathway name
HMDB	HMDB ID
B_age	Beta: Age (Darst et al.)
p_age	P-value: Age (Darst et al.)
Menni2013_B_age	Beta: Age (Menni et al.)
Menni2013_p_age	P-value: Age (Menni et al.)
Reference: Menni C, Kastenmüller G, Petersen AK, et al. Metabolomic markers reveal novel pathways of ageing and early development in human populations. International Journal of Epidemiology. 2013;42(4):1111-1119. doi:10.1093/ije/dyt094.
