# Supplementary material for: Longitudinal plasma metabolomics of aging and sex
Source: Aging (Albany NY). 2019 Feb 24;11(4):1262–82. doi: 10.18632/aging.101837 (PMC6402508; doi:10.18632/aging.101837)
Supplement: Supplementary Table S3 [file aging-11-101837-s005.xlsx]

## Sheet: Results
compID	BIOCHEMICAL	SUPER.PATHWAY	SUB.PATHWAY	HMDB	B_sex	p_sex	Krumsiek2015_B_sex	Krumsiek2015_p_sex
32197	3-(4-hydroxyphenyl)lactate	Amino Acid	Tyrosine Metabolism	HMDB00755	-0.1187	3.22408e-48	-0.489	2.68e-97
32397	3-hydroxy-2-ethylpropionate	Amino Acid	Leucine, Isoleucine and Valine Metabolism	HMDB00396	-0.04991	2.029247e-11	-0.135	8.78e-05
44526	3-methyl-2-oxobutyrate	Amino Acid	Leucine, Isoleucine and Valine Metabolism	HMDB00019	-0.03681	1.332747e-14	-0.165	1.41e-32
15676	3-methyl-2-oxovalerate	Amino Acid	Leucine, Isoleucine and Valine Metabolism	HMDB03736	-0.09249	5.574726e-58	-0.369	1.04e-117
22116	4-methyl-2-oxopentanoate	Amino Acid	Leucine, Isoleucine and Valine Metabolism	HMDB00695	-0.09514	8.413803e-60	-0.359	3.21e-102
36098	4-vinylphenol sulfate	Xenobiotics	Benzoate Metabolism	HMDB04072	-0.1302	4.0670155e-08	-0.764	6.43e-35
33968	5-dodecenoate (12:1n7)	Lipid	Medium Chain Fatty Acid	HMDB00529	0.2009	5.764703e-48	0.367	1.13e-28
1494	5-oxoproline	Amino Acid	Glutathione Metabolism	HMDB00267	-0.02172	1.1355424e-06	-0.082	1.48e-13
37190	5alpha-androstan-3beta,17beta-diol disulfate	Lipid	Androgenic Steroids	HMDB00493	-0.584	1.635208e-83	-1.752	1.71e-193
36776	7-alpha-hydroxy-3-oxo-4-cholestenoate (7-Hoca)	Lipid	Sterol	HMDB12458	-0.02766	6.1656e-05	-0.119	1.56e-09
1107	allantoin	Nucleotide	Purine Metabolism, (Hypo)Xanthine/Inosine containing	HMDB00462	-0.03063	9.436653e-15	-0.261	6.84e-08
33937	alpha-hydroxyisovalerate	Amino Acid	Leucine, Isoleucine and Valine Metabolism	HMDB00407	-0.1117	1.202759e-20	-0.591	4.78e-75
31591	androsterone sulfate	Lipid	Androgenic Steroids	HMDB02759	-0.2272	2.27758e-18	-0.482	2.41e-21
12129	beta-hydroxyisovalerate	Amino Acid	Leucine, Isoleucine and Valine Metabolism	HMDB00754	-0.09546	1.628729e-37	-0.243	1.41e-20
3141	betaine	Amino Acid	Glycine, Serine and Threonine Metabolism	HMDB00043	-0.04762	6.083893e-20	-0.213	2.5e-32
2137	biliverdin	Cofactors and Vitamins	Hemoglobin and Porphyrin Metabolism	HMDB01008	-0.1275	4.755141e-30	-0.205	1.08e-08
1642	caprate (10:0)	Lipid	Medium Chain Fatty Acid	HMDB00511	0.08759	4.421129e-17	0.072	3.93e-08
22842	cholate	Lipid	Primary Bile Acid Metabolism	HMDB00619	-0.1823	3.4952149e-07	-0.513	2.15e-09
63	cholesterol	Lipid	Sterol	HMDB00067	0.04147	8.315755e-15	0.078	8.78e-09
15506	choline	Lipid	Phospholipid Metabolism	HMDB00097	-0.02675	2.2118038e-09	-0.087	1.5e-20
27718	creatine	Amino Acid	Creatine Metabolism	HMDB00064	0.1707	4.291574e-57	0.623	3.65e-87
513	creatinine	Amino Acid	Creatine Metabolism	HMDB00562	-0.06912	1.425648e-70	-0.211	9.62e-50
35159	cysteine-glutathione disulfide	Amino Acid	Glutathione Metabolism	HMDB00656	0.06617	0.0005595592	0.24	1.5e-11
32425	dehydroisoandrosterone sulfate (DHEA-S)	Lipid	Androgenic Steroids	HMDB01032	-0.1938	2.557504e-26	-0.58	1.62e-47
34457	gamma-glutamylisoleucine*	Peptide	Gamma-glutamyl Amino Acid	HMDB11170	-0.09762	3.200783e-28	-0.285	2.44e-19
18369	gamma-glutamylleucine	Peptide	Gamma-glutamyl Amino Acid	HMDB11171	-0.08927	2.533431e-49	-0.319	3.92e-99
33422	gamma-glutamylphenylalanine	Peptide	Gamma-glutamyl Amino Acid	HMDB00594	-0.04393	7.272044e-12	-0.158	1.2e-22
2734	gamma-glutamyltyrosine	Peptide	Gamma-glutamyl Amino Acid	HMDB11741	-0.03759	3.8304106e-07	-0.119	2.93e-14
43829	gamma-glutamylvaline	Peptide	Gamma-glutamyl Amino Acid	HMDB11172	-0.06545	1.432527e-11	-0.277	7.56e-56
48152	glucose	Carbohydrate	Glycolysis, Gluconeogenesis, and Pyruvate Metabolism	HMDB00122	-0.01068	0.0002152304	-0.09	1.25e-12
57	glutamate	Amino Acid	Glutamate Metabolism	HMDB00148	-0.1284	2.290007e-33	-0.243	2.19e-21
15122	glycerol	Lipid	Glycerolipid Metabolism	HMDB00131	0.21	3.164163e-89	0.389	1.01e-73
58	glycine	Amino Acid	Glycine, Serine and Threonine Metabolism	HMDB00123	0.0844	7.019373e-34	0.25	1.49e-40
27513	indoleacetate	Amino Acid	Tryptophan Metabolism	HMDB00197	-0.0699	2.1859421e-09	-0.196	2.1e-10
18349	indolelactate	Amino Acid	Tryptophan Metabolism	HMDB00671	-0.1163	2.214639e-46	-0.269	1.12e-26
1125	isoleucine	Amino Acid	Leucine, Isoleucine and Valine Metabolism	HMDB00172	-0.07596	6.641702e-83	-0.278	4.54e-127
15140	kynurenine	Amino Acid	Tryptophan Metabolism	HMDB00684	-0.02848	1.2359295e-06	-0.121	1.17e-15
527	lactate	Carbohydrate	Glycolysis, Gluconeogenesis, and Pyruvate Metabolism	HMDB00190	-0.03585	6.6245248e-08	-0.098	4.03e-10
1645	laurate (12:0)	Lipid	Medium Chain Fatty Acid	HMDB00638	0.1309	4.162425e-30	0.159	4.48e-20
60	leucine	Amino Acid	Leucine, Isoleucine and Valine Metabolism	HMDB00687	-0.07127	1.080551e-82	-0.229	2.79e-123
1105	linoleate (18:2n6)	Lipid	Polyunsaturated Fatty Acid (n3 and n6)	HMDB00673	0.09411	1.808299e-23	0.165	2.46e-19
1303	malate	Energy	TCA Cycle	HMDB00156	-0.02767	9.6942348e-08	-0.104	3.29e-05
48153	mannose	Carbohydrate	Fructose, Mannose and Galactose Metabolism	HMDB00169	-0.02096	5.05709e-05	-0.142	8.57e-16
1121	margarate (17:0)	Lipid	Long Chain Fatty Acid	HMDB02259	0.04465	8.0054164e-07	0.128	7.92e-10
1302	methionine	Amino Acid	Methionine, Cysteine, SAM and Taurine Metabolism	HMDB00696	-0.05132	5.322187e-39	-0.152	5.37e-55
1365	myristate (14:0)	Lipid	Long Chain Fatty Acid	HMDB00806	0.1119	4.313918e-26	0.222	5.65e-26
32418	myristoleate (14:1n5)	Lipid	Long Chain Fatty Acid	HMDB02000	0.2321	5.075624e-64	0.491	3.64e-70
27710	N-acetylglycine	Amino Acid	Glycine, Serine and Threonine Metabolism	HMDB00532	0.1176	2.069569e-20	0.304	2.65e-14
33447	palmitoleate (16:1n7)	Lipid	Long Chain Fatty Acid	HMDB03229	0.2162	2.385405e-46	0.338	8.21e-33
1361	pentadecanoate (15:0)	Lipid	Long Chain Fatty Acid	HMDB00826	0.0595	1.280141e-17	0.204	4.45e-22
64	phenylalanine	Amino Acid	Phenylalanine Metabolism	HMDB00159	-0.02706	9.643709e-21	-0.081	3.72e-23
22130	phenyllactate (PLA)	Amino Acid	Phenylalanine Metabolism	HMDB00779	-0.1306	2.067847e-54	-0.271	1.41e-21
42109	phosphate	Energy	Oxidative Phosphorylation	HMDB01429	0.05111	5.603985e-21	0.155	4.46e-45
1444	pipecolate	Amino Acid	Lysine Metabolism	HMDB00070	-0.05661	1.6437e-05	-0.228	2.99e-16
35127	pro-hydroxy-pro	Amino Acid	Urea cycle; Arginine and Proline Metabolism	HMDB06695	0.05322	1.0619072e-08	0.116	4.1e-08
1898	proline	Amino Acid	Urea cycle; Arginine and Proline Metabolism	HMDB00162	-0.05613	4.083967e-20	-0.214	1.78e-36
46225	pyroglutamine*	Amino Acid	Glutamate Metabolism		-0.2955	1.552392e-93	-0.955	6.21e-152
1648	serine	Amino Acid	Glycine, Serine and Threonine Metabolism	HMDB00187	0.02876	4.0536469e-09	0.088	3.38e-08
33969	stearidonate (18:4n3)	Lipid	Polyunsaturated Fatty Acid (n3 and n6)	HMDB06547	0.1774	4.853121e-29	0.147	4.16e-06
27738	threonate	Cofactors and Vitamins	Ascorbate and Aldarate Metabolism	HMDB00943	0.05025	1.5626546e-06	0.278	1.52e-20
32306	trans-4-hydroxyproline	Amino Acid	Urea cycle; Arginine and Proline Metabolism	HMDB00725	-0.03937	8.9995564e-07	-0.204	8.79e-11
54	tryptophan	Amino Acid	Tryptophan Metabolism	HMDB00929	-0.0423	1.439836e-27	-0.114	6.96e-33
1299	tyrosine	Amino Acid	Tyrosine Metabolism	HMDB00158	-0.03027	1.08804e-11	-0.082	6.98e-13
1604	urate	Nucleotide	Purine Metabolism, (Hypo)Xanthine/Inosine containing	HMDB00289	-0.08497	1.222705e-54	-0.284	7.04e-114
1670	urea	Amino Acid	Urea cycle; Arginine and Proline Metabolism	HMDB00294	-0.03106	7.4329965e-07	-0.113	9.17e-09
1649	valine	Amino Acid	Leucine, Isoleucine and Valine Metabolism	HMDB00883	-0.0582	1.127247e-39	-0.152	1.41e-67
46459	X-01911	Unknown			-0.1938	1.742558e-08	-0.522	3.57e-26
46599	X-11440	Unknown			-0.2704	1.130399e-42	-0.842	7.46e-89
46360	X-11441	Unknown			-0.134	1.5406829e-08	-0.237	1.2e-10
46443	X-11442	Unknown			-0.1259	4.8718705e-08	-0.266	2.41e-13
46460	X-11444	Unknown			-0.09846	2.744631e-16	-0.32	8.04e-35
46600	X-11452	Unknown			-0.203	2.742754e-13	-0.407	1.63e-18
46601	X-11470	Unknown			-0.06654	1.65417e-05	-0.21	2.47e-14
47901	X-11485	Unknown			-0.2955	1.190359e-20	-0.424	1.07e-23
47651	X-11491	Unknown			-0.1917	2.150039e-10	-0.239	9.56e-07
46603	X-11530	Unknown			-0.1213	1.087715e-18	-0.201	4.99e-11
33132	X-11787	Unknown			-0.02321	1.0881807e-06	-0.113	5e-19
33140	X-11795	Unknown			-0.1293	6.790527e-16	-0.215	7.95e-18
46607	X-11849	Unknown			0.1083	0.0178078651	0.356	5.69e-05
46588	X-12063	Unknown			-0.1411	8.124869e-11	-0.261	3.8e-11
46510	X-12544	Unknown			-0.1572	2.4336714e-07	-0.373	1.59e-05
46364	X-12847	Unknown			-0.2379	8.31009e-14	-0.249	5.4e-05
46733	X-13435	Unknown			-0.2421	9.898996e-18	-0.281	5.27e-20
46656	X-14662	Unknown			-0.1223	0.0024444921	-0.313	1.08e-05

## Sheet: Legend
compID	Compound ID
BIOCHEMICAL	Biochemical name
SUPER.PATHWAY	Super pathway name
SUB.PATHWAY	Sub pathway name
HMDB	HMDB ID
B_sex	Beta: Age (Darst et al.)
p_sex	P-value: Age (Darst et al.)
Krumsiek2015_B_sex	Beta: Sex (Krumsiek et al., 2015 )
Krumsiek2015_p_sex	P-value: Sex (Krumsiek et al.)
Reference: Krumsiek J, Mittelstrass K, Do KT, et al. Gender-specific pathway differences in the human serum metabolome. Metabolomics. 2015;11(6):1815-1833. doi:10.1007/s11306-015-0829-0.
