# Supplementary material for: Longitudinal plasma metabolomics of aging and sex
Source: Aging (Albany NY). 2019 Feb 24;11(4):1262–82. doi: 10.18632/aging.101837 (PMC6402508; doi:10.18632/aging.101837)
Supplement: Supplementary Table S4 [file aging-11-101837-s006.xlsx]

## Sheet: Results
compID	BIOCHEMICAL	h2	SUPER.PATHWAY	SUB.PATHWAY	HMDB	B_age	p_age	gene	SNP	Shin2014_B_snp	Shin2014_p_snp
15676	3-methyl-2-oxovalerate	0.688584	Amino Acid	Leucine, Isoleucine and Valine Metabolism	HMDB03736	-0.00136	0.000551167	PPM1K	rs1440581	-0.014	1.21E-16
1558	4-acetamidobutanoate	0.449889	Amino Acid	Polyamine Metabolism	HMDB03681	0.005257	1.01374e-12	NAT2	rs721399	-0.029	3.95E-58
1558	4-acetamidobutanoate	0.449889	Amino Acid	Polyamine Metabolism	HMDB03681	0.005257	1.01374e-12	NAT2	rs4921913	-0.036	2.80E-47
1558	4-acetamidobutanoate	0.449889	Amino Acid	Polyamine Metabolism	HMDB03681	0.005257	1.01374e-12	ABP1	rs1005390	-0.035	2.61E-16
1494	5-oxoproline	0.49018	Amino Acid	Glutathione Metabolism	HMDB00267	0.000739	0.0218075	OPLAH	rs12550729	0.064	5.97E-110
37190	5alpha-androstan-3beta,17beta-diol disulfate	0.411474	Lipid	Androgenic Steroids	HMDB00493	-0.01274	2.05593e-10	CYP3A5	rs10278040	-0.19	1.17E-29
37190	5alpha-androstan-3beta,17beta-diol disulfate	0.411474	Lipid	Androgenic Steroids	HMDB00493	-0.01274	2.05593e-10	SULT2A1	rs2547231	0.081	3.35E-22
37190	5alpha-androstan-3beta,17beta-diol disulfate	0.411474	Lipid	Androgenic Steroids	HMDB00493	-0.01274	2.05593e-10	ZCWPW1	rs13222543	-0.263	1.18E-20
31591	androsterone sulfate	0.334868	Lipid	Androgenic Steroids	HMDB02759	-0.01478	9.79884e-16	CYP3A5	rs10278040	-0.361	8.82E-113
31591	androsterone sulfate	0.334868	Lipid	Androgenic Steroids	HMDB02759	-0.01478	9.79884e-16	ZCWPW1	rs13222543	-0.477	6.80E-74
31591	androsterone sulfate	0.334868	Lipid	Androgenic Steroids	HMDB02759	-0.01478	9.79884e-16	ZCWPW1	rs13222543	-0.49	4.49E-104
31591	androsterone sulfate	0.334868	Lipid	Androgenic Steroids	HMDB02759	-0.01478	9.79884e-16	CYP3A5	rs7809615	-0.249	7.98E-139
31591	androsterone sulfate	0.334868	Lipid	Androgenic Steroids	HMDB02759	-0.01478	9.79884e-16	AKR1C4	rs17134585	0.043	2.95E-38
31591	androsterone sulfate	0.334868	Lipid	Androgenic Steroids	HMDB02759	-0.01478	9.79884e-16	SULT2A1	rs182420	0.051	6.24E-12
32586	bilirubin (E,E)*	0.714709	Cofactors and Vitamins	Hemoglobin and Porphyrin Metabolism		0.003394	0.000248555	UGT1A1	rs887829	0.128	3.76E-95
47886	bilirubin (E,Z or Z,E)*	0.770506	Cofactors and Vitamins	Hemoglobin and Porphyrin Metabolism	HMDB00488	0.002353	0.000438202	UGT1A1	rs887829	0.081	1.79E-56
43807	bilirubin (Z,Z)	0.745513	Cofactors and Vitamins	Hemoglobin and Porphyrin Metabolism	HMDB00054	0.001883	0.00185935	UGT1A1	rs887829	0.168	2.15E-152
2137	biliverdin	0.671411	Cofactors and Vitamins	Hemoglobin and Porphyrin Metabolism	HMDB01008	0.003442	1.35018e-05	UGT1A1	rs887829	0.113	2.50E-168
1564	citrate	0.388624	Energy	TCA Cycle	HMDB00094	0.001816	8.18095e-15	ANKH	rs835154*	-0.012	1.02E-10
1564	citrate	0.388624	Energy	TCA Cycle	HMDB00094	0.001816	8.18095e-15	SLC13A5	rs1509123	-0.025	5.20E-09
1564	citrate	0.388624	Energy	TCA Cycle	HMDB00094	0.001816	8.18095e-15	SLC13A5	rs170149	0.026	1.42E-13
2132	citrulline	0.415201	Amino Acid	Urea cycle; Arginine and Proline Metabolism	HMDB00904	0.001662	2.39888e-06	ALDH18A1	rs56322409*	-0.011	7.81E-11
32425	dehydroisoandrosterone sulfate (DHEA-S)	0.457925	Lipid	Androgenic Steroids	HMDB01032	-0.01477	1.78067e-29	SULT2A1	rs296396	-0.046	1.17E-12
32425	dehydroisoandrosterone sulfate (DHEA-S)	0.457925	Lipid	Androgenic Steroids	HMDB01032	-0.01477	1.78067e-29	SLC17A3	rs1185567	-0.028	1.07E-26
32504	docosapentaenoate (n3 DPA; 22:5n3)	0.383651	Lipid	Polyunsaturated Fatty Acid (n3 and n6)	HMDB06528	0.004601	2.19878e-06	ELOVL2	rs9393915	0.042	1.42E-22
32504	docosapentaenoate (n3 DPA; 22:5n3)	0.383651	Lipid	Polyunsaturated Fatty Acid (n3 and n6)	HMDB06528	0.004601	2.19878e-06	FADS1	rs174538	-0.026	8.90E-14
18467	eicosapentaenoate (EPA; 20:5n3)	0.522076	Lipid	Polyunsaturated Fatty Acid (n3 and n6)	HMDB01999	0.005261	1.49745e-05	FADS1	rs174556	-0.036	1.97E-22
33973	epiandrosterone sulfate	0.350554	Lipid	Androgenic Steroids		-0.01382	2.51061e-14	CYP3A5	rs11974702	0.184	2.80E-75
33973	epiandrosterone sulfate	0.350554	Lipid	Androgenic Steroids		-0.01382	2.51061e-14	ZCWPW1	rs13222543	-0.347	3.31E-47
20699	erythritol	0.302702	Xenobiotics	Food Component/Plant	HMDB02994	0.004834	9.62758e-09	NASP	rs1053941	-0.017	4.99E-11
20699	erythritol	0.302702	Xenobiotics	Food Component/Plant	HMDB02994	0.004834	9.62758e-09	DMBX1	rs7542172	-0.024	1.98E-12
42420	erythronate*	0.484738	Carbohydrate	Aminosugar Metabolism	HMDB00613	0.003301	6.24593e-23	TKT	rs4687717	0.013	1.07E-13
2730	gamma-glutamylglutamine	0.504298	Peptide	Gamma-glutamyl Amino Acid	HMDB11738	0.001118	0.00381029	GLS2	rs2657879	0.024	5.85E-19
48152	glucose	0.625254	Carbohydrate	Glycolysis, Gluconeogenesis, and Pyruvate Metabolism	HMDB00122	0.000606	0.00304057	GCKR	rs1260326	0.041	2.50E-148
53	glutamine	0.343032	Amino Acid	Glutamate Metabolism	HMDB00641	0.000528	0.00750398	GLS2	rs2657879	0.015	6.15E-18
53	glutamine	0.343032	Amino Acid	Glutamate Metabolism	HMDB00641	0.000528	0.00750398	GLS2	rs2694917	0.018	1.64E-29
59	histidine	0.306264	Amino Acid	Histidine Metabolism	HMDB00177	-0.00109	2.77741e-06	SLC2A9	rs16868246	0.01	1.78E-14
22138	homocitrulline	0.258341	Amino Acid	Urea cycle; Arginine and Proline Metabolism	HMDB00679	0.004271	0.000479483	SLC7A9	rs8101881	0.033	1.43E-16
33009	homostachydrine*	0.625955	Xenobiotics	Food Component/Plant	HMDB33433	0.002719	0.0258589	SLC22A4	rs11950562	0.03	6.75E-11
18349	indolelactate	0.504672	Amino Acid	Tryptophan Metabolism	HMDB00671	-0.00144	0.00988144	CCBL1	rs15676	0.019	1.33E-12
15140	kynurenine	0.591056	Amino Acid	Tryptophan Metabolism	HMDB00684	0.001525	0.00033025	SLC7A5	rs8051149	0.026	9.07E-26
15140	kynurenine	0.591056	Amino Acid	Tryptophan Metabolism	HMDB00684	0.001525	0.00033025	SH2B3	rs3184504	0.015	6.05E-18
60	leucine	0.501692	Amino Acid	Leucine, Isoleucine and Valine Metabolism	HMDB00687	-0.00059	0.0155661	PPM1K	rs1440581	-0.008	1.44E-19
1105	linoleate (18:2n6)	0.292531	Lipid	Polyunsaturated Fatty Acid (n3 and n6)	HMDB00673	0.002264	0.000615194	THEM4	rs6693388	-0.041	3.72E-38
1105	linoleate (18:2n6)	0.292531	Lipid	Polyunsaturated Fatty Acid (n3 and n6)	HMDB00673	0.002264	0.000615194	PDXDC1	rs2740	-0.022	5.29E-32
48153	mannose	0.552137	Carbohydrate	Fructose, Mannose and Galactose Metabolism	HMDB00169	0.000921	0.0122471	GCKR	rs1260326	-0.044	1.30E-77
1121	margarate (17:0)	0.303012	Lipid	Long Chain Fatty Acid	HMDB02259	0.003106	1.56328e-06	SCD	rs603424	0.029	1.56E-14
1124	myo-inositol	0.054429	Lipid	Inositol Metabolism	HMDB00211	0.004965	9.02306e-12	ISYNA1	rs4808136	0.013	5.42E-14
1124	myo-inositol	0.054429	Lipid	Inositol Metabolism	HMDB00211	0.004965	9.02306e-12	SLC5A11	rs4788439	-0.027	6.59E-13
1365	myristate (14:0)	0.118609	Lipid	Long Chain Fatty Acid	HMDB00806	0.002388	0.0011444	SCD	rs603424	0.054	1.21E-115
32418	myristoleate (14:1n5)	0.235005	Lipid	Long Chain Fatty Acid	HMDB02000	0.002523	0.0061783	SCD	rs603424	-0.037	7.16E-16
27710	N-acetylglycine	0.54241	Amino Acid	Glycine, Serine and Threonine Metabolism	HMDB00532	0.002194	0.0146211	CPS1	rs715	-0.091	6.66E-58
33447	palmitoleate (16:1n7)	0.286673	Lipid	Long Chain Fatty Acid	HMDB03229	0.003057	0.00303185	SCD	rs603424	-0.037	1.31E-14
1508	pantothenate		Cofactors and Vitamins	Pantothenate and CoA Metabolism	HMDB00210	0.004123	5.16665e-06	SLC5A6	rs1395	0.017	8.14E-11
46225	pyroglutamine*	0.66419	Amino Acid	Glutamate Metabolism		0.003167	0.000875018	SLC6A13	rs11613331	0.037	2.23E-25
46225	pyroglutamine*	0.66419	Amino Acid	Glutamate Metabolism		0.003167	0.000875018	SLC6A20	rs17279437	0.059	1.25E-20
46225	pyroglutamine*	0.66419	Amino Acid	Glutamate Metabolism		0.003167	0.000875018	CPS1	rs715	0.036	2.46E-16
1648	serine	0.608478	Amino Acid	Glycine, Serine and Threonine Metabolism	HMDB00187	-0.00092	0.00850819	CPS1	rs715	-0.022	2.69E-21
1648	serine	0.608478	Amino Acid	Glycine, Serine and Threonine Metabolism	HMDB00187	-0.00092	0.00850819	PHGDH	rs1163251	0.019	7.05E-27
1648	serine	0.608478	Amino Acid	Glycine, Serine and Threonine Metabolism	HMDB00187	-0.00092	0.00850819	PSPH	rs4947534	-0.018	1.96E-14
1358	stearate (18:0)	0.439701	Lipid	Long Chain Fatty Acid	HMDB00827	0.001449	0.000177163	SCD	rs603424	0.023	6.06E-21
33969	stearidonate (18:4n3)	0.511035	Lipid	Polyunsaturated Fatty Acid (n3 and n6)	HMDB06547	0.003948	0.000365792	FADS1	rs174601	-0.034	7.93E-16
54	tryptophan	0.43461	Amino Acid	Tryptophan Metabolism	HMDB00929	-0.00074	0.00638852	SLC16A10	rs6901004	-0.006	1.08E-11
54	tryptophan	0.43461	Amino Acid	Tryptophan Metabolism	HMDB00929	-0.00074	0.00638852	TDO2	rs13122250	0.006	8.95E-12
1299	tyrosine	0.393534	Amino Acid	Tyrosine Metabolism	HMDB00158	0.000712	0.0253153	SLC16A10	rs9400467	-0.012	6.54E-14
1604	urate	0.393447	Nucleotide	Purine Metabolism, (Hypo)Xanthine/Inosine containing	HMDB00289	0.000955	0.0103208	SLC2A9	rs938554	-0.035	5.85E-93
1604	urate	0.393447	Nucleotide	Purine Metabolism, (Hypo)Xanthine/Inosine containing	HMDB00289	0.000955	0.0103208	SLC2A9	rs6838021	-0.043	6.36E-68
606	uridine	0.359954	Nucleotide	Pyrimidine Metabolism, Uracil containing	HMDB00296	-0.00089	0.0155531	TYMP	rs131794	0.015	4.37E-16
33973	epiandrosterone sulfate	0.350554	Lipid	Androgenic Steroids		-0.01382	2.51061e-14	AKR1C4	rs17134585	0.043	2.95E-38
42420	erythronate*	0.484738	Carbohydrate	Aminosugar Metabolism	HMDB00613	0.003301	6.24593e-23	TKT	rs4687717	-0.018	8.85E-23
59	histidine	0.306264	Amino Acid	Histidine Metabolism	HMDB00177	-0.00109	2.77741e-06	GLS2	rs2694917	0.018	1.64E-29
59	histidine	0.306264	Amino Acid	Histidine Metabolism	HMDB00177	-0.00109	2.77741e-06	SLC2A9	rs6838021	-0.043	6.36E-68
48153	mannose	0.552137	Carbohydrate	Fructose, Mannose and Galactose Metabolism	HMDB00169	0.000921	0.0122471	GCKR	rs1260326	0.041	2.50E-148
1124	myo-inositol	0.054429	Lipid	Inositol Metabolism	HMDB00211	0.004965	9.02306e-12	NAT8	rs13538	0.223	5.02E-498
32418	myristoleate (14:1n5)	0.235005	Lipid	Long Chain Fatty Acid	HMDB02000	0.002523	0.0061783	SCD	rs603424	0.054	1.21E-115
15650	N1-methyladenosine	0.456579	Nucleotide	Purine Metabolism, Adenine containing	HMDB03331	0.001742	2.39716e-08	NAT2	rs4921913	-0.036	2.80E-47
35137	N2,N2-dimethylguanosine	0.900143	Nucleotide	Purine Metabolism, Guanine containing	HMDB04824	0.003391	7.87413e-17	DDC	rs7809234	0.049	5.57E-14
46225	pyroglutamine*	0.66419	Amino Acid	Glutamate Metabolism		0.003167	0.000875018	SLC6A13	rs7969761	-0.045	1.01E-27
46225	pyroglutamine*	0.66419	Amino Acid	Glutamate Metabolism		0.003167	0.000875018	SLC6A20	rs17279437	-0.094	1.78E-35

## Sheet: Legend
compID	Compound ID
BIOCHEMICAL	Biochemical name
h2	Metabolite heritability
HMDB	HMDB ID
SUPER.PATHWAY	Super pathway name
SUB.PATHWAY	Sub pathway name
B_age	Beta: Metabolite association with age (Darst et al.)
p_age	P-value: Metabolite association with age (Darst et al.)
Gene	SNP gene
SNP	Single nucleotide polymorphism (genetic variant)
Shin2014_B_snp	Beta: Metabolite association with SNP (Shin et al.)
Shin2014_p_snp	P-value: Metabolite association with SNP (Shin et al.)
Reference: Shin SY, Fauman EB, Petersen AK, et al. An atlas of genetic influences on human blood metabolites. Nat Gen. 2014;46(6):543-550. doi:10.1038/ng.2982.
