# Supplementary material for: Longitudinal plasma metabolomics of aging and sex
Source: Aging (Albany NY). 2019 Feb 24;11(4):1262–82. doi: 10.18632/aging.101837 (PMC6402508; doi:10.18632/aging.101837)
Supplement: Supplementary Table S5 [file aging-11-101837-s007.xlsx]

## Sheet: Results
compID	BIOCHEMICAL	h2	SUPER.PATHWAY	SUB.PATHWAY	HMDB	B_sex	p_sex	gene	SNP	Shin2014_B_snp	Shin2014_p_snp
34395	1-methylurate	0.381498	Xenobiotics	Xanthine Metabolism	HMDB03099	-0.09736	0.00299441	NAT2	rs1495741	0.057	1.04E-27
20675	1,5-anhydroglucitol (1,5-AG)	0.517434	Carbohydrate	Glycolysis, Gluconeogenesis, and Pyruvate Metabolism	HMDB02712	-0.04843	4.37187e-05	MGAM	rs3800993	0.029	1.53E-15
20675	1,5-anhydroglucitol (1,5-AG)	0.517434	Carbohydrate	Glycolysis, Gluconeogenesis, and Pyruvate Metabolism	HMDB02712	-0.04843	4.37187e-05	RAB3GAP1	rs7570971	-0.037	7.86E-45
42374	2-aminobutyrate	0.564662	Amino Acid	Glutathione Metabolism	HMDB00650	-0.0189	0.00416131	PPM1K	rs10022462	-0.012	4.55E-11
42374	2-aminobutyrate	0.564662	Amino Acid	Glutathione Metabolism	HMDB00650	-0.0189	0.00416131	SLC1A4	rs10211524	0.019	5.59E-16
32197	3-(4-hydroxyphenyl)lactate		Amino Acid	Tyrosine Metabolism	HMDB00755	-0.1187	3.22408e-48	CCDC57	rs4625783	-0.019	3.90E-13
32197	3-(4-hydroxyphenyl)lactate		Amino Acid	Tyrosine Metabolism	HMDB00755	-0.1187	3.22408e-48	HPS5	rs4150581	-0.043	2.47E-37
15676	3-methyl-2-oxovalerate	0.688584	Amino Acid	Leucine, Isoleucine and Valine Metabolism	HMDB03736	-0.09249	5.57473e-58	PPM1K	rs1440581	-0.014	1.21E-16
1558	4-acetamidobutanoate	0.449889	Amino Acid	Polyamine Metabolism	HMDB03681	0.02564	0.0116133	NAT2	rs4921913	-0.036	2.80E-47
1558	4-acetamidobutanoate	0.449889	Amino Acid	Polyamine Metabolism	HMDB03681	0.02564	0.0116133	ABP1	rs1005390	-0.035	2.61E-16
1558	4-acetamidobutanoate	0.449889	Amino Acid	Polyamine Metabolism	HMDB03681	0.02564	0.0116133	NAT2	rs721399	-0.029	3.95E-58
1494	5-oxoproline	0.49018	Amino Acid	Glutathione Metabolism	HMDB00267	-0.02172	1.13554e-06	OPLAH	rs12550729	0.064	5.97E-110
37190	5alpha-androstan-3beta,17beta-diol disulfate	0.411474	Lipid	Androgenic Steroids	HMDB00493	-0.584	1.63521e-83	ZCWPW1	rs13222543	-0.263	1.18E-20
37190	5alpha-androstan-3beta,17beta-diol disulfate	0.411474	Lipid	Androgenic Steroids	HMDB00493	-0.584	1.63521e-83	CYP3A5	rs10278040	-0.19	1.17E-29
37190	5alpha-androstan-3beta,17beta-diol disulfate	0.411474	Lipid	Androgenic Steroids	HMDB00493	-0.584	1.63521e-83	SULT2A1	rs2547231	0.081	3.35E-22
32980	adrenate (22:4n6)	0.402416	Lipid	Polyunsaturated Fatty Acid (n3 and n6)	HMDB02226	0.05051	6.40929e-05	FADS1	rs174550	0.035	6.79E-24
1126	alanine	0.484605	Amino Acid	Alanine and Aspartate Metabolism	HMDB00161	-0.02369	1.37481e-07	GCKR	rs1260326	0.013	5.56E-14
33937	alpha-hydroxyisovalerate	0.160837	Amino Acid	Leucine, Isoleucine and Valine Metabolism	HMDB00407	-0.1117	1.20276e-20	HPS5	rs2403254	-0.041	1.26E-30
33937	alpha-hydroxyisovalerate	0.160837	Amino Acid	Leucine, Isoleucine and Valine Metabolism	HMDB00407	-0.1117	1.20276e-20	HAO2	rs12141041	-0.025	1.77E-12
31591	androsterone sulfate	0.334868	Lipid	Androgenic Steroids	HMDB02759	-0.2272	2.27758e-18	CYP3A5	rs10278040	-0.361	8.82E-113
31591	androsterone sulfate	0.334868	Lipid	Androgenic Steroids	HMDB02759	-0.2272	2.27758e-18	SULT2A1	rs182420	0.051	6.24E-12
31591	androsterone sulfate	0.334868	Lipid	Androgenic Steroids	HMDB02759	-0.2272	2.27758e-18	AKR1C4	rs17134585	0.043	2.95E-38
31591	androsterone sulfate	0.334868	Lipid	Androgenic Steroids	HMDB02759	-0.2272	2.27758e-18	ZCWPW1	rs13222543	-0.49	4.49E-104
31591	androsterone sulfate	0.334868	Lipid	Androgenic Steroids	HMDB02759	-0.2272	2.27758e-18	CYP3A5	rs7809615	-0.249	7.98E-139
31591	androsterone sulfate	0.334868	Lipid	Androgenic Steroids	HMDB02759	-0.2272	2.27758e-18	ZCWPW1	rs13222543	-0.477	6.80E-74
1110	arachidonate (20:4n6)	0.317167	Lipid	Polyunsaturated Fatty Acid (n3 and n6)	HMDB01043	0.04565	3.71708e-08	FADS1	rs174548	0.049	1.43E-84
1110	arachidonate (20:4n6)	0.317167	Lipid	Polyunsaturated Fatty Acid (n3 and n6)	HMDB01043	0.04565	3.71708e-08	FADS1	rs174548	0.071	1.53E-361
1110	arachidonate (20:4n6)	0.317167	Lipid	Polyunsaturated Fatty Acid (n3 and n6)	HMDB01043	0.04565	3.71708e-08	MBOAT7	rs2576452	0.028	2.39E-29
512	asparagine	0.464844	Amino Acid	Alanine and Aspartate Metabolism	HMDB00168	-0.01704	6.80317e-07	ASPG	rs4144027	0.012	1.33E-11
3141	betaine	0.459438	Amino Acid	Glycine, Serine and Threonine Metabolism	HMDB00043	-0.04762	6.08389e-20	CPS1	rs715	0.022	2.08E-19
3141	betaine	0.459438	Amino Acid	Glycine, Serine and Threonine Metabolism	HMDB00043	-0.04762	6.08389e-20	CBS	rs2851391	-0.012	1.15E-11
3141	betaine	0.459438	Amino Acid	Glycine, Serine and Threonine Metabolism	HMDB00043	-0.04762	6.08389e-20	SLC6A13	rs7969761	-0.045	1.01E-27
3141	betaine	0.459438	Amino Acid	Glycine, Serine and Threonine Metabolism	HMDB00043	-0.04762	6.08389e-20	SLC6A12	rs499368	-0.019	8.14E-13
3141	betaine	0.459438	Amino Acid	Glycine, Serine and Threonine Metabolism	HMDB00043	-0.04762	6.08389e-20	BHMT	rs16876394	0.03	1.49E-19
32586	bilirubin (E,E)*	0.714709	Cofactors and Vitamins	Hemoglobin and Porphyrin Metabolism		-0.08732	1.29468e-11	UGT1A1	rs887829	0.128	3.76E-95
47886	bilirubin (E,Z or Z,E)*	0.770506	Cofactors and Vitamins	Hemoglobin and Porphyrin Metabolism	HMDB00488	-0.09501	7.43938e-24	UGT1A1	rs887829	0.081	1.79E-56
43807	bilirubin (Z,Z)	0.745513	Cofactors and Vitamins	Hemoglobin and Porphyrin Metabolism	HMDB00054	-0.08172	6.6499e-22	UGT1A1	rs887829	0.168	2.15E-152
2137	biliverdin	0.671411	Cofactors and Vitamins	Hemoglobin and Porphyrin Metabolism	HMDB01008	-0.1275	4.75514e-30	UGT1A1	rs887829	0.113	2.50E-168
15500	carnitine	0.719368	Lipid	Carnitine Metabolism	HMDB00062	-0.02215	3.48709e-07	PEX5L	rs9842133	0.006	4.20E-12
15500	carnitine	0.719368	Lipid	Carnitine Metabolism	HMDB00062	-0.02215	3.48709e-07	SLC16A9	rs1171615	0.077	2.40E-95
15500	carnitine	0.719368	Lipid	Carnitine Metabolism	HMDB00062	-0.02215	3.48709e-07	SLC16A9	rs12356193	0.027	3.69E-63
15500	carnitine	0.719368	Lipid	Carnitine Metabolism	HMDB00062	-0.02215	3.48709e-07	ALX3	rs1466788	-0.007	3.05E-16
15500	carnitine	0.719368	Lipid	Carnitine Metabolism	HMDB00062	-0.02215	3.48709e-07	SLC22A4	rs419291	0.008	3.10E-18
1564	citrate	0.388624	Energy	TCA Cycle	HMDB00094	0.009961	0.00212985	SLC13A5	rs1509123	-0.025	5.20E-09
1564	citrate	0.388624	Energy	TCA Cycle	HMDB00094	0.009961	0.00212985	ANKH	rs835154*	-0.012	1.02E-10
1564	citrate	0.388624	Energy	TCA Cycle	HMDB00094	0.009961	0.00212985	SLC13A5	rs170149	0.026	1.42E-13
27718	creatine	0.761279	Amino Acid	Creatine Metabolism	HMDB00064	0.1707	4.29157e-57	CPS1	rs715	-0.045	9.63E-25
35159	cysteine-glutathione disulfide	0.603531	Amino Acid	Glutathione Metabolism	HMDB00656	0.06617	0.000559559	GGT1	rs2330809*	-0.055	1.76E-13
32425	dehydroisoandrosterone sulfate (DHEA-S)	0.457925	Lipid	Androgenic Steroids	HMDB01032	-0.1938	2.5575e-26	SULT2A1	rs296396	-0.046	1.17E-12
32425	dehydroisoandrosterone sulfate (DHEA-S)	0.457925	Lipid	Androgenic Steroids	HMDB01032	-0.1938	2.5575e-26	SLC17A3	rs1185567	-0.028	1.07E-26
35718	dihomo-linolenate (20:3n3 or n6)	0.152637	Lipid	Polyunsaturated Fatty Acid (n3 and n6)	HMDB02925	0.06144	6.36956e-13	PDXDC1	rs6498540	0.017	2.55E-11
35718	dihomo-linolenate (20:3n3 or n6)	0.152637	Lipid	Polyunsaturated Fatty Acid (n3 and n6)	HMDB02925	0.06144	6.36956e-13	FADS1	rs968567	0.033	2.14E-21
32504	docosapentaenoate (n3 DPA; 22:5n3)	0.383651	Lipid	Polyunsaturated Fatty Acid (n3 and n6)	HMDB06528	0.1078	3.57063e-15	ELOVL2	rs9393915	0.042	1.42E-22
32504	docosapentaenoate (n3 DPA; 22:5n3)	0.383651	Lipid	Polyunsaturated Fatty Acid (n3 and n6)	HMDB06528	0.1078	3.57063e-15	FADS1	rs174538	-0.026	8.90E-14
18467	eicosapentaenoate (EPA; 20:5n3)	0.522076	Lipid	Polyunsaturated Fatty Acid (n3 and n6)	HMDB01999	0.08487	5.94207e-07	FADS1	rs174556	-0.036	1.97E-22
33973	epiandrosterone sulfate	0.350554	Lipid	Androgenic Steroids		-0.3098	8.32367e-33	CYP3A5	rs11974702	0.184	2.80E-75
33973	epiandrosterone sulfate	0.350554	Lipid	Androgenic Steroids		-0.3098	8.32367e-33	ZCWPW1	rs13222543	-0.347	3.31E-47
48152	glucose	0.625254	Carbohydrate	Glycolysis, Gluconeogenesis, and Pyruvate Metabolism	HMDB00122	-0.01068	0.00021523	GCKR	rs1260326	0.041	2.50E-148
58	glycine	0.716633	Amino Acid	Glycine, Serine and Threonine Metabolism	HMDB00123	0.0844	7.01937e-34	CPS1	rs715	-0.076	1.58E-147
27513	indoleacetate	0.309066	Amino Acid	Tryptophan Metabolism	HMDB00197	-0.0699	2.18594e-09	DDC	rs7809234	0.049	5.57E-14
18349	indolelactate	0.504672	Amino Acid	Tryptophan Metabolism	HMDB00671	-0.1163	2.21464e-46	CCBL1	rs15676	0.019	1.33E-12
1125	isoleucine	0.610595	Amino Acid	Leucine, Isoleucine and Valine Metabolism	HMDB00172	-0.07596	6.6417e-83	SLCO1B1	rs4149056	0.3	6.16E-328
15140	kynurenine	0.591056	Amino Acid	Tryptophan Metabolism	HMDB00684	-0.02848	1.23593e-06	SLC7A5	rs8051149	0.026	9.07E-26
15140	kynurenine	0.591056	Amino Acid	Tryptophan Metabolism	HMDB00684	-0.02848	1.23593e-06	SH2B3	rs3184504	0.015	6.05E-18
60	leucine	0.501692	Amino Acid	Leucine, Isoleucine and Valine Metabolism	HMDB00687	-0.07127	1.08055e-82	PPM1K	rs1440581	-0.008	1.44E-19
1105	linoleate (18:2n6)	0.292531	Lipid	Polyunsaturated Fatty Acid (n3 and n6)	HMDB00673	0.09411	1.8083e-23	PDXDC1	rs2740	-0.022	5.29E-32
1105	linoleate (18:2n6)	0.292531	Lipid	Polyunsaturated Fatty Acid (n3 and n6)	HMDB00673	0.09411	1.8083e-23	THEM4	rs6693388	-0.041	3.72E-38
48153	mannose	0.552137	Carbohydrate	Fructose, Mannose and Galactose Metabolism	HMDB00169	-0.02096	5.05709e-05	GCKR	rs1260326	-0.044	1.30E-77
1121	margarate (17:0)	0.303012	Lipid	Long Chain Fatty Acid	HMDB02259	0.04465	8.00542e-07	SCD	rs603424	0.029	1.56E-14
1365	myristate (14:0)	0.118609	Lipid	Long Chain Fatty Acid	HMDB00806	0.1119	4.31392e-26	SCD	rs603424	0.054	1.21E-115
32418	myristoleate (14:1n5)	0.235005	Lipid	Long Chain Fatty Acid	HMDB02000	0.2321	5.07562e-64	SCD	rs603424	-0.037	7.16E-16
27710	N-acetylglycine	0.54241	Amino Acid	Glycine, Serine and Threonine Metabolism	HMDB00532	0.1176	2.06957e-20	CPS1	rs715	-0.091	6.66E-58
33447	palmitoleate (16:1n7)	0.286673	Lipid	Long Chain Fatty Acid	HMDB03229	0.2162	2.38541e-46	SCD	rs603424	-0.037	1.31E-14
64	phenylalanine	0.521725	Amino Acid	Phenylalanine Metabolism	HMDB00159	-0.02706	9.64371e-21	PAH	rs1498694	0.008	7.34E-11
22130	phenyllactate (PLA)	0.688866	Amino Acid	Phenylalanine Metabolism	HMDB00779	-0.1306	2.06785e-54	GOT2	rs4784054	0.035	2.31E-21
22130	phenyllactate (PLA)	0.688866	Amino Acid	Phenylalanine Metabolism	HMDB00779	-0.1306	2.06785e-54	GOT2	rs12709013	0.027	2.72E-24
42109	phosphate	0.535474	Energy	Oxidative Phosphorylation	HMDB01429	0.05111	5.60399e-21	TKT	rs4687717	-0.018	8.85E-23
1898	proline	0.75353	Amino Acid	Urea cycle; Arginine and Proline Metabolism	HMDB00162	-0.05613	4.08397e-20	PRODH	rs2540641	0.063	2.98E-59
46225	pyroglutamine*	0.66419	Amino Acid	Glutamate Metabolism		-0.2955	1.55239e-93	SLC6A13	rs11613331	0.037	2.23E-25
46225	pyroglutamine*	0.66419	Amino Acid	Glutamate Metabolism		-0.2955	1.55239e-93	CPS1	rs715	0.036	2.46E-16
46225	pyroglutamine*	0.66419	Amino Acid	Glutamate Metabolism		-0.2955	1.55239e-93	SLC6A20	rs17279437	0.059	1.25E-20
1648	serine	0.608478	Amino Acid	Glycine, Serine and Threonine Metabolism	HMDB00187	0.02876	4.05365e-09	PHGDH	rs1163251	0.019	7.05E-27
1648	serine	0.608478	Amino Acid	Glycine, Serine and Threonine Metabolism	HMDB00187	0.02876	4.05365e-09	PSPH	rs4947534	-0.018	1.96E-14
1648	serine	0.608478	Amino Acid	Glycine, Serine and Threonine Metabolism	HMDB00187	0.02876	4.05365e-09	CPS1	rs715	-0.022	2.69E-21
1358	stearate (18:0)	0.439701	Lipid	Long Chain Fatty Acid	HMDB00827	0.01641	0.00228031	SCD	rs603424	0.023	6.06E-21
33969	stearidonate (18:4n3)	0.511035	Lipid	Polyunsaturated Fatty Acid (n3 and n6)	HMDB06547	0.1774	4.85312e-29	FADS1	rs174601	-0.034	7.93E-16
54	tryptophan	0.43461	Amino Acid	Tryptophan Metabolism	HMDB00929	-0.0423	1.43984e-27	TDO2	rs13122250	0.006	8.95E-12
54	tryptophan	0.43461	Amino Acid	Tryptophan Metabolism	HMDB00929	-0.0423	1.43984e-27	SLC16A10	rs6901004	-0.006	1.08E-11
1299	tyrosine	0.393534	Amino Acid	Tyrosine Metabolism	HMDB00158	-0.03027	1.08804e-11	SLC16A10	rs9400467	-0.012	6.54E-14
1604	urate	0.393447	Nucleotide	Purine Metabolism, (Hypo)Xanthine/Inosine containing	HMDB00289	-0.08497	1.2227e-54	SLC2A9	rs6838021	-0.043	6.36E-68
1604	urate	0.393447	Nucleotide	Purine Metabolism, (Hypo)Xanthine/Inosine containing	HMDB00289	-0.08497	1.2227e-54	SLC2A9	rs938554	-0.035	5.85E-93
606	uridine	0.359954	Nucleotide	Pyrimidine Metabolism, Uracil containing	HMDB00296	-0.01374	0.00748637	TYMP	rs131794	0.015	4.37E-16
1649	valine	0.34813	Amino Acid	Leucine, Isoleucine and Valine Metabolism	HMDB00883	-0.0582	1.12725e-39	PPM1K	rs1440581	-0.008	2.56E-12
1649	valine	0.34813	Amino Acid	Leucine, Isoleucine and Valine Metabolism	HMDB00883	-0.0582	1.12725e-39	SLC22A4	rs272889	-0.039	2.56E-51
1649	valine	0.34813	Amino Acid	Leucine, Isoleucine and Valine Metabolism	HMDB00883	-0.0582	1.12725e-39	PRODH	rs2540647	-0.059	2.04E-70
33937	alpha-hydroxyisovalerate	0.160837	Amino Acid	Leucine, Isoleucine and Valine Metabolism	HMDB00407	-0.1117	1.20276e-20	HPS5	rs4150581	-0.043	2.47E-37
63	cholesterol	0.212586	Lipid	Sterol	HMDB00067	0.04147	8.31576e-15	SGPP1	rs7157785	0.065	1.39E-133
63	cholesterol	0.212586	Lipid	Sterol	HMDB00067	0.04147	8.31576e-15	APOE	rs445925	0.089	4.65E-23
35718	dihomo-linolenate (20:3n3 or n6)	0.152637	Lipid	Polyunsaturated Fatty Acid (n3 and n6)	HMDB02925	0.06144	6.36956e-13	FADS1	rs174548	0.071	1.53E-361
35718	dihomo-linolenate (20:3n3 or n6)	0.152637	Lipid	Polyunsaturated Fatty Acid (n3 and n6)	HMDB02925	0.06144	6.36956e-13	PDXDC1	rs2740	-0.022	5.29E-32
33973	epiandrosterone sulfate	0.350554	Lipid	Androgenic Steroids		-0.3098	8.32367e-33	AKR1C4	rs17134585	0.043	2.95E-38
48153	mannose	0.552137	Carbohydrate	Fructose, Mannose and Galactose Metabolism	HMDB00169	-0.02096	5.05709e-05	GCKR	rs1260326	0.041	2.50E-148
32418	myristoleate (14:1n5)	0.235005	Lipid	Long Chain Fatty Acid	HMDB02000	0.2321	5.07562e-64	SCD	rs603424	0.054	1.21E-115
35137	N2,N2-dimethylguanosine	0.900143	Nucleotide	Purine Metabolism, Guanine containing	HMDB04824	-0.0129	0.0204624	DDC	rs7809234	0.049	5.57E-14
64	phenylalanine	0.521725	Amino Acid	Phenylalanine Metabolism	HMDB00159	-0.02706	9.64371e-21	GOT2	rs12709013	0.027	2.72E-24
64	phenylalanine	0.521725	Amino Acid	Phenylalanine Metabolism	HMDB00159	-0.02706	9.64371e-21	SLC22A1	rs316020	-0.183	2.77E-286
1898	proline	0.75353	Amino Acid	Urea cycle; Arginine and Proline Metabolism	HMDB00162	-0.05613	4.08397e-20	PRODH	rs2540647	-0.059	2.04E-70
46225	pyroglutamine*	0.66419	Amino Acid	Glutamate Metabolism		-0.2955	1.55239e-93	SLC6A13	rs7969761	-0.045	1.01E-27
46225	pyroglutamine*	0.66419	Amino Acid	Glutamate Metabolism		-0.2955	1.55239e-93	SLC6A20	rs17279437	-0.094	1.78E-35

## Sheet: Legend
compID	Compound ID
BIOCHEMICAL	Biochemical name
h2	Metabolite heritability
HMDB	HMDB ID
SUPER.PATHWAY	Super pathway name
SUB.PATHWAY	Sub pathway name
B_sex	Beta: Metabolite association with sex (Darst et al.)
p_sex	P-value: Metabolite association with sex (Darst et al.)
Gene	SNP gene
SNP	Single nucleotide polymorphism (genetic variant)
Shin2014_B_snp	Beta: Metabolite association with SNP (Shin et al.)
Shin2014_p_snp	P-value: Metabolite association with SNP (Shin et al.)
Reference: Shin SY, Fauman EB, Petersen AK, et al. An atlas of genetic influences on human blood metabolites. Nat Gen. 2014;46(6):543-550. doi:10.1038/ng.2982.
